# Supplementary material
Source: MDPI journal article supplement (https://www.mdpi.com/2075-163X/9/3/174)
Supplement: s1 [file s1]

# Supplemental material – thin sections

| Samples   | Sampled lithologies                 |
|-----------|-------------------------------------|
| 5A-21D-4I | Dyke (meladiorite)                  |
| 5A-21D-4J | Dyke (quartz-diorite)               |
| 5A-32R-2C | Meladiorite and quartz-diorite      |
| 5G-35D-2B | Dyke (meladiorite)                  |
| 6C-8D-6   | Meladiorite and quartz-diorite      |
| 6C-15D-4G | Dyke (mafic)                        |
| 6E-22D-6A | Meladiorite                         |
| PLD-6-1   | Quartz-diorite and biotite-tonalite |
| PLD-29-8  | Quartz-diorite                      |
| PLD-30-5A | Quartz-diorite                      |
| PLD-31-6B | Meladiorite                         |
| PMD-8-4   | Quartz-diorite                      |
| PMD-9-5   | Biotite-tonalite                    |

## Elements of interest:

- Main phases (feldspar, quartz, amphibole, biotite);
- Porphyritic texture;
- Zoning in feldspar;
- Metamorphism and deformation (PMD samples).

Note on sample selection: only the freshest samples are shown; i.e., with preserved feldspar and biotite.

# Sample 5A-21D-4I

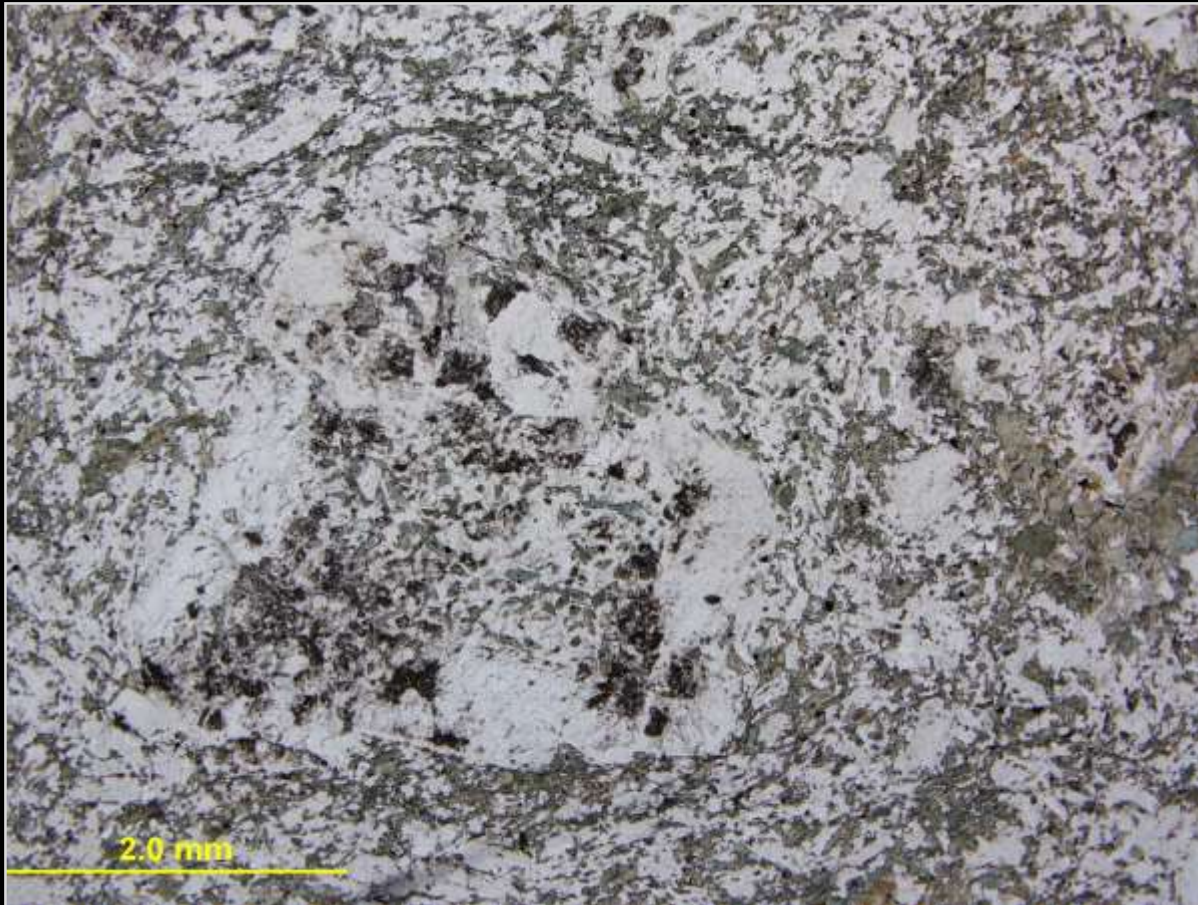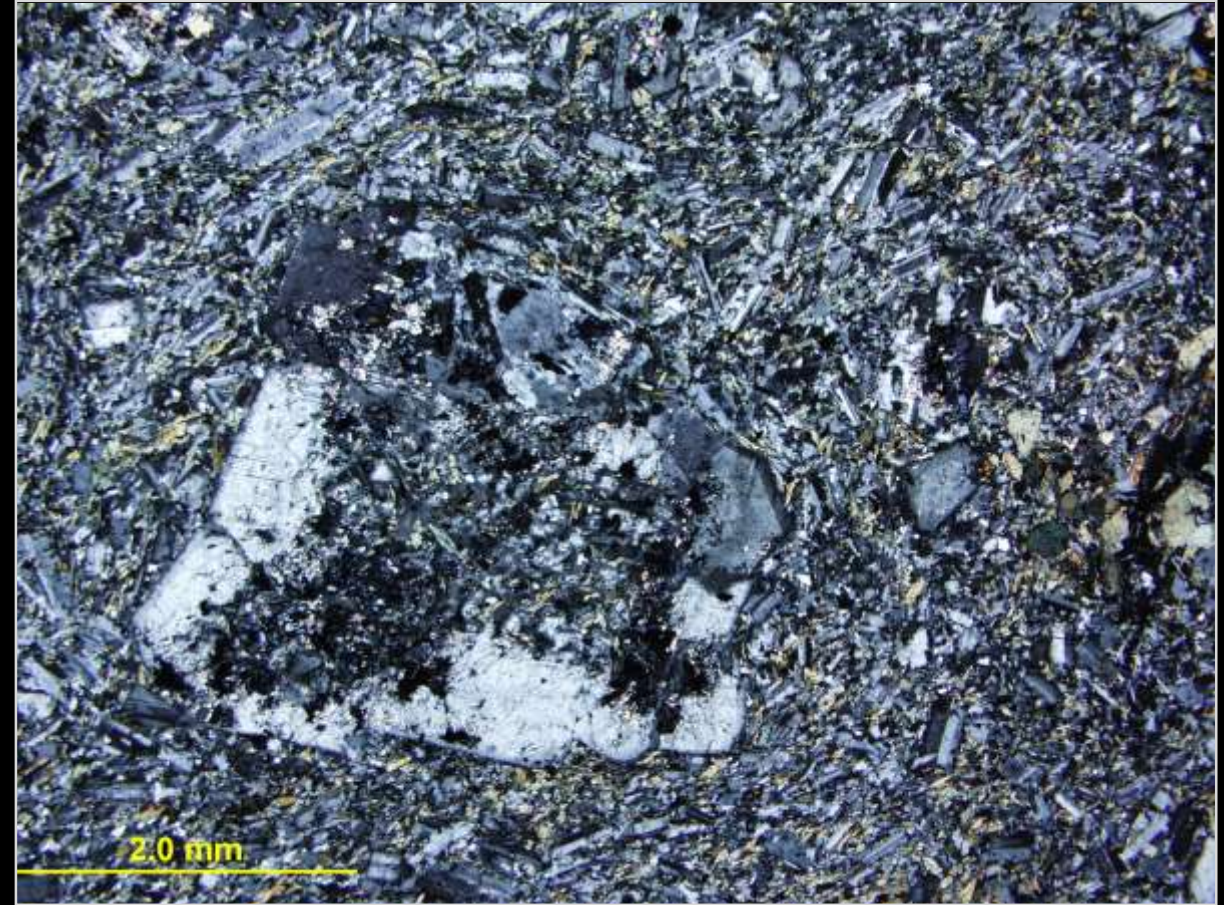

Plane transmitted and cross polarized light microphotographs

# Sample 5A-21D-4J

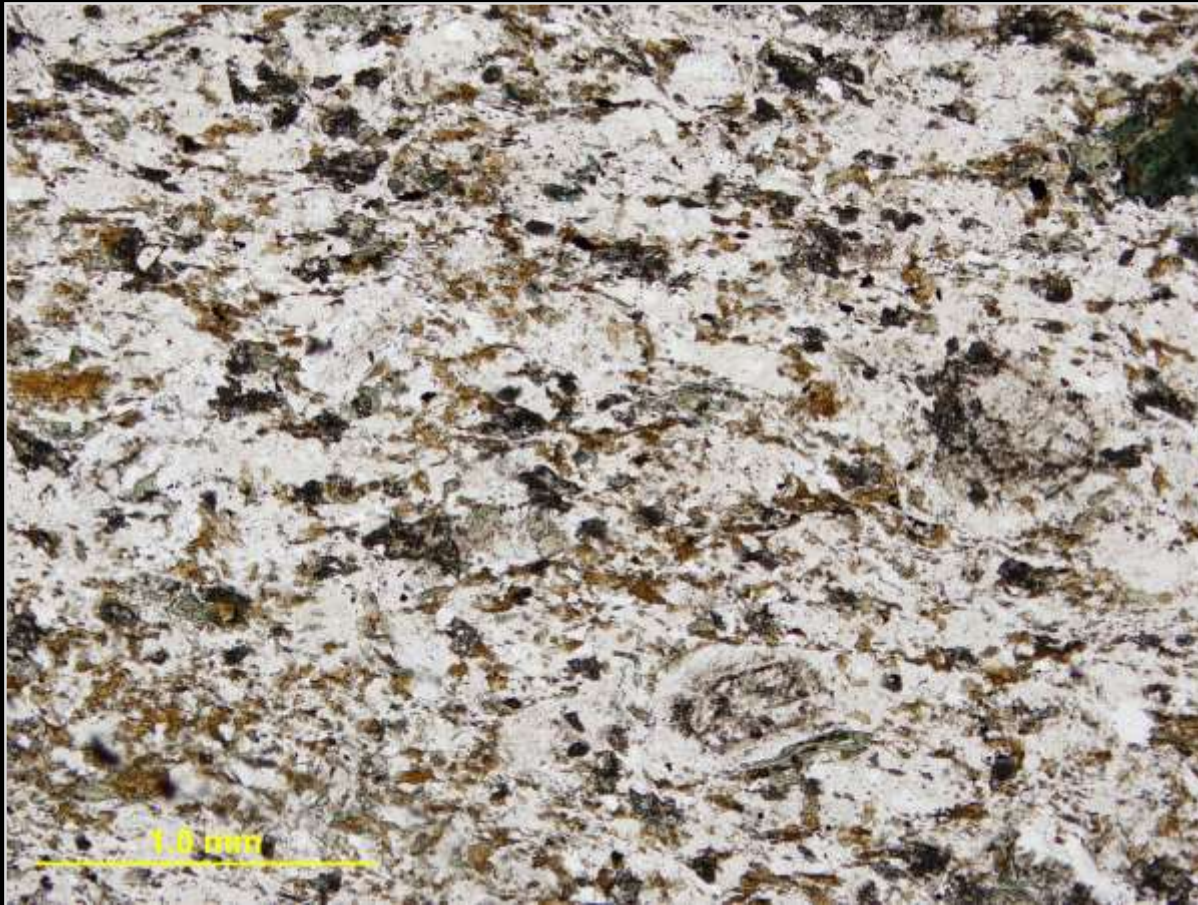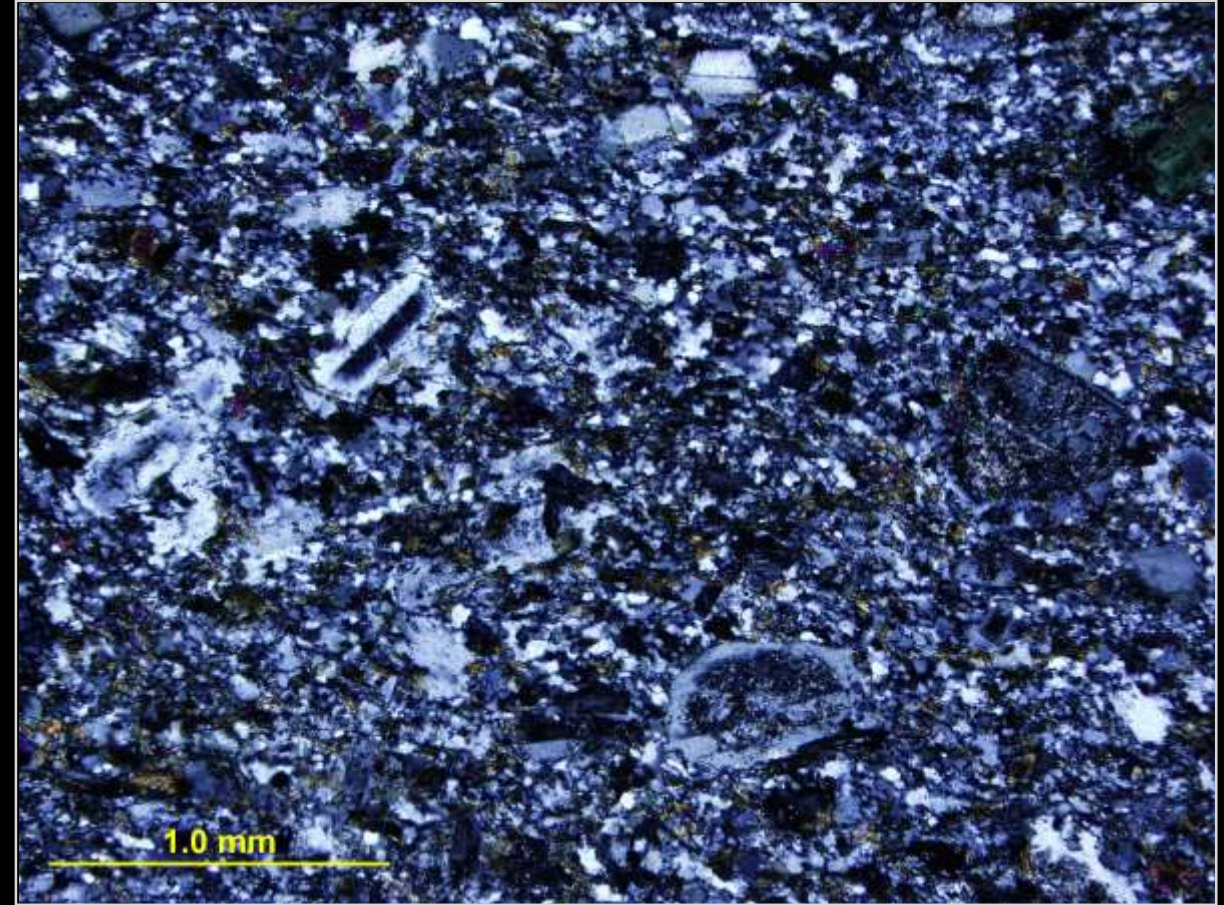

Plane transmitted and cross polarized light microphotographs

# Sample 5A-21D-4J

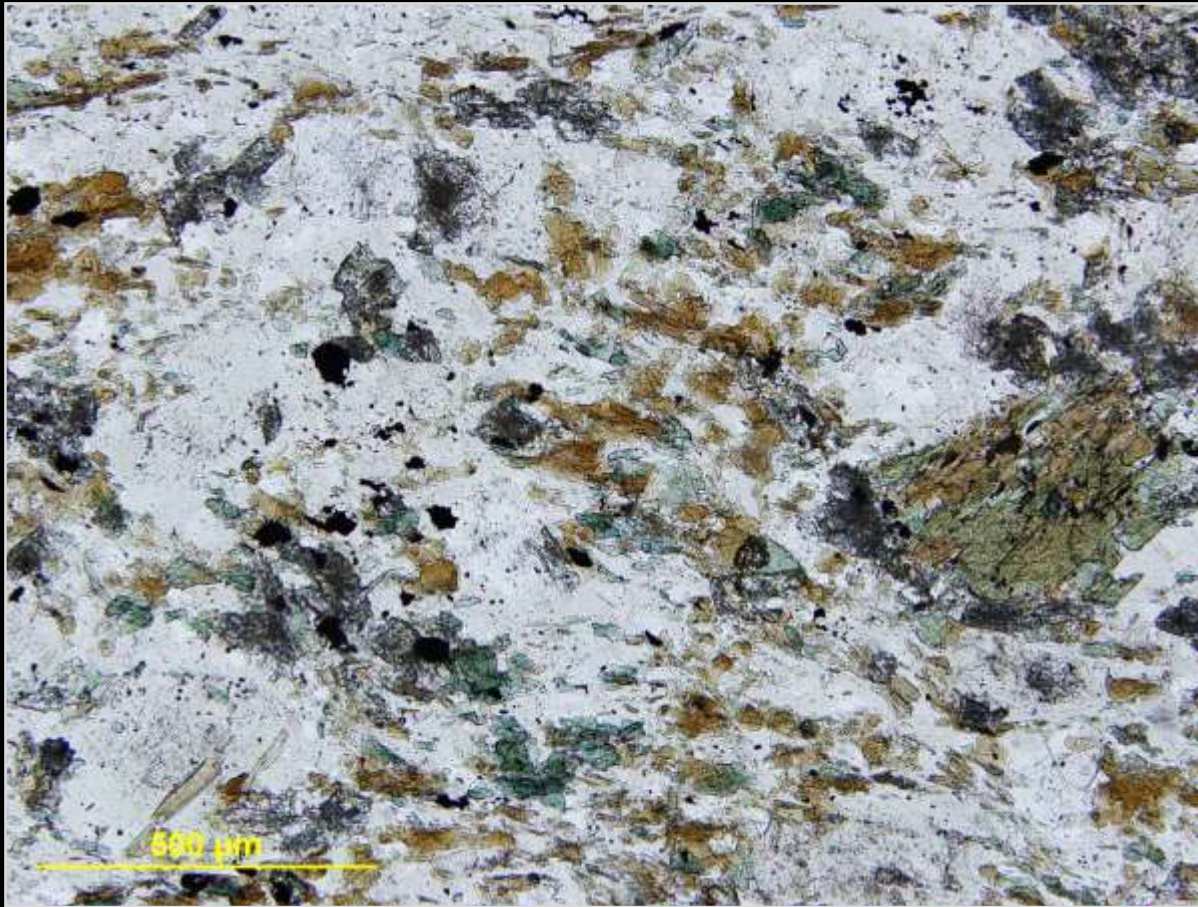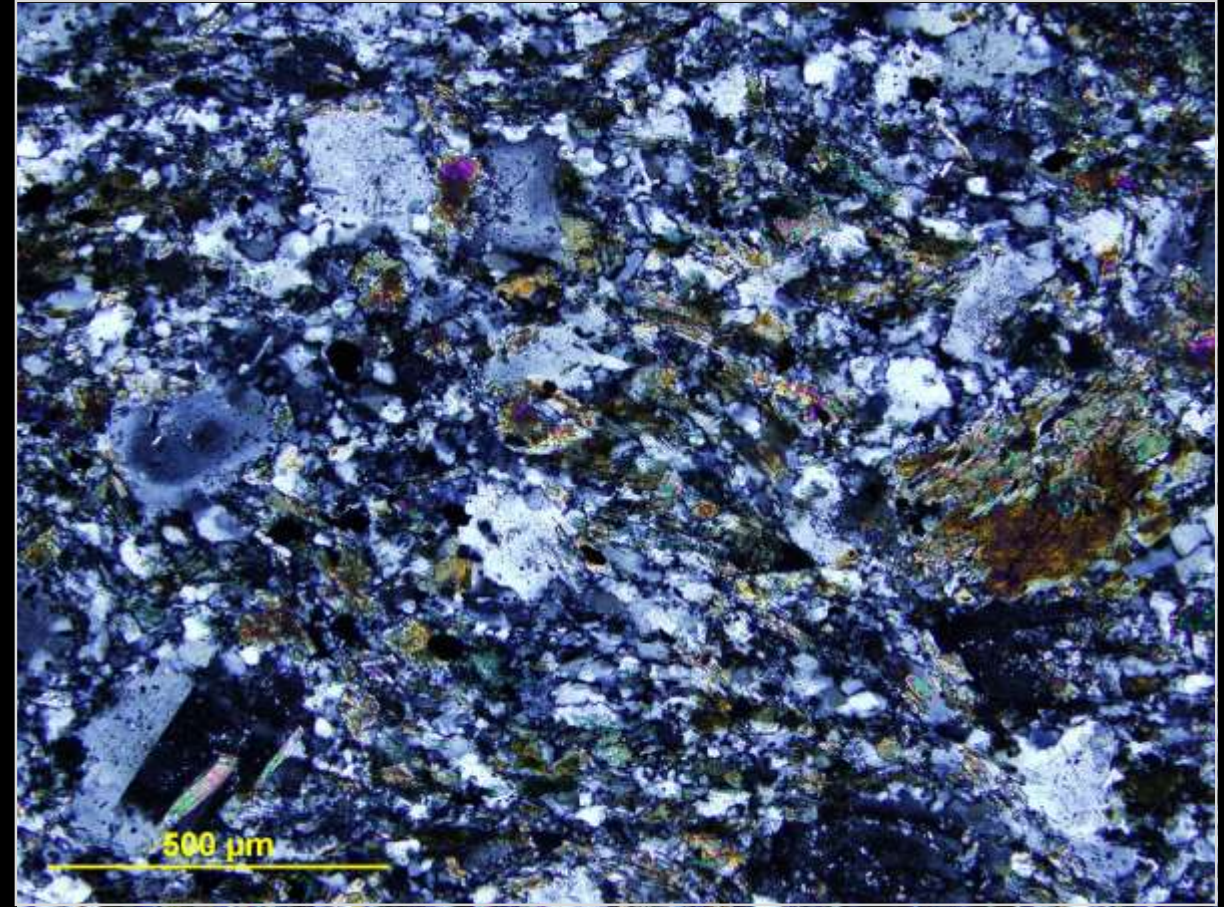

Plane transmitted and cross polarized light microphotographs

# Sample 5A-32R-2C

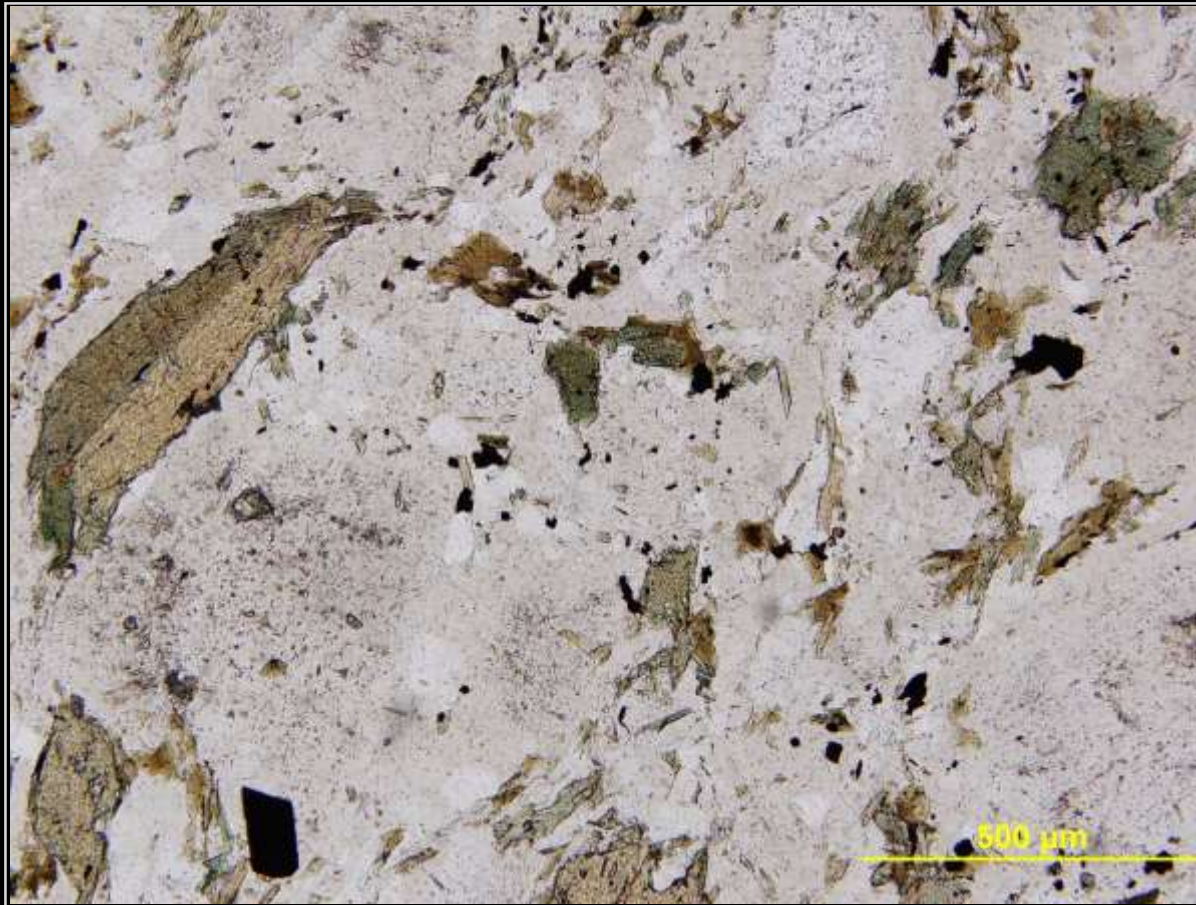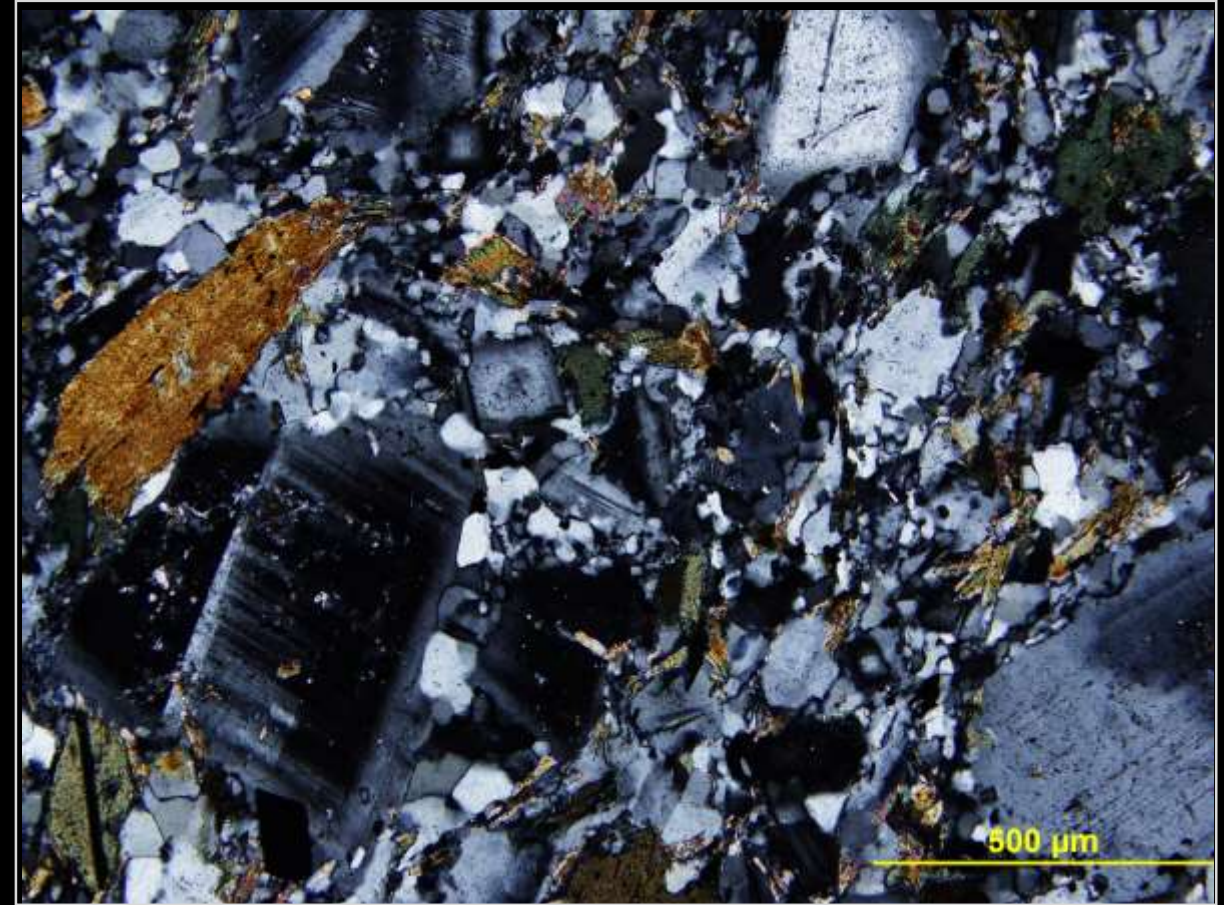

Plane transmitted and cross polarized light microphotographs

# Sample 5A-32R-2C

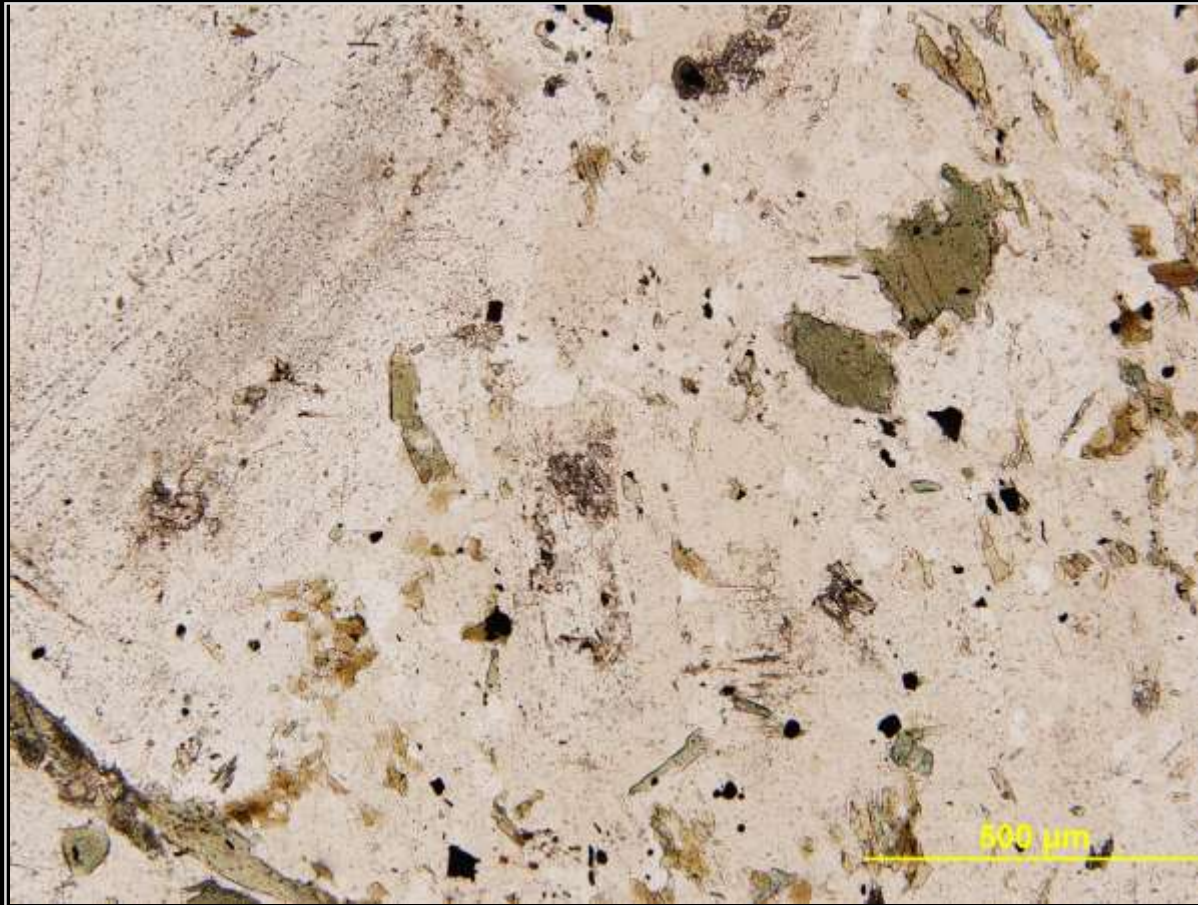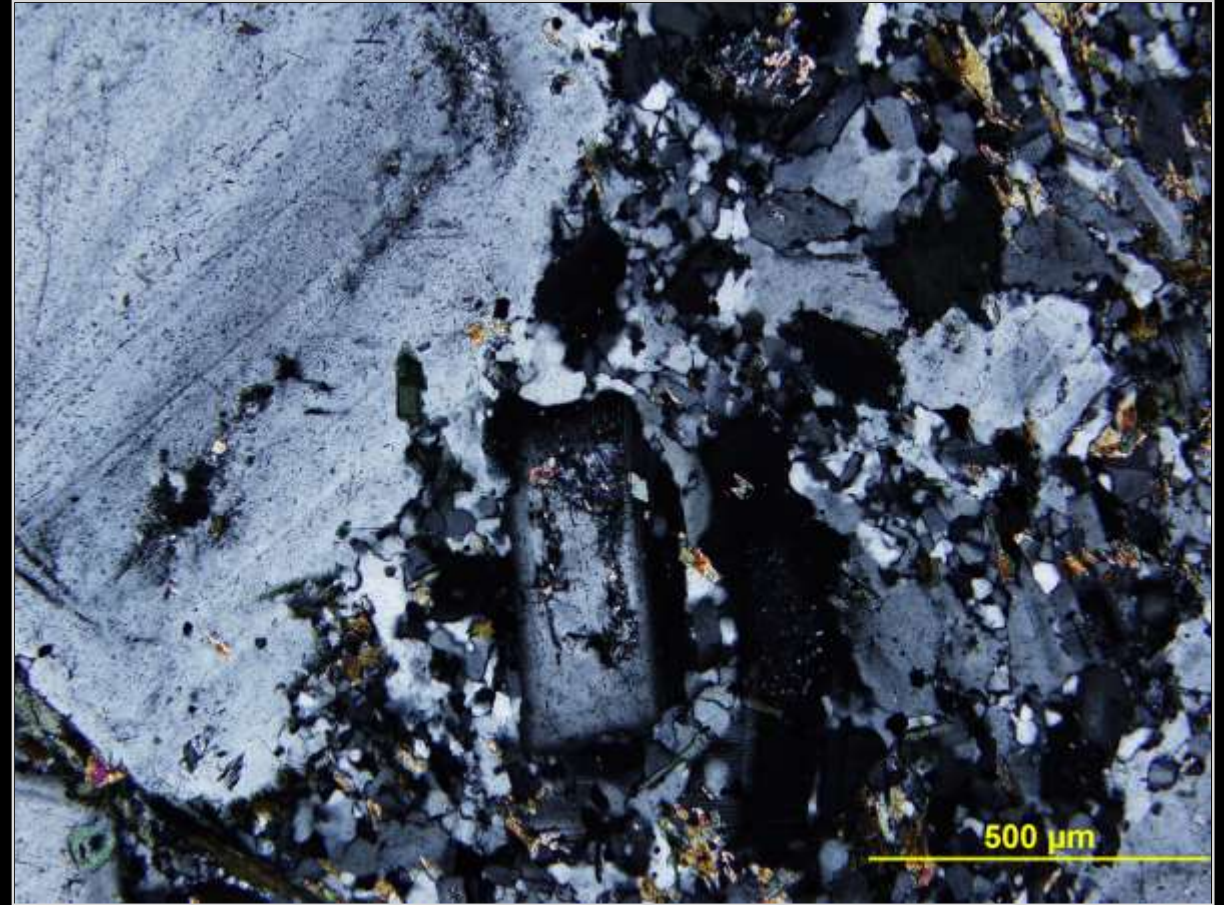

Plane transmitted and cross polarized light microphotographs

# Sample 5A-32R-2C

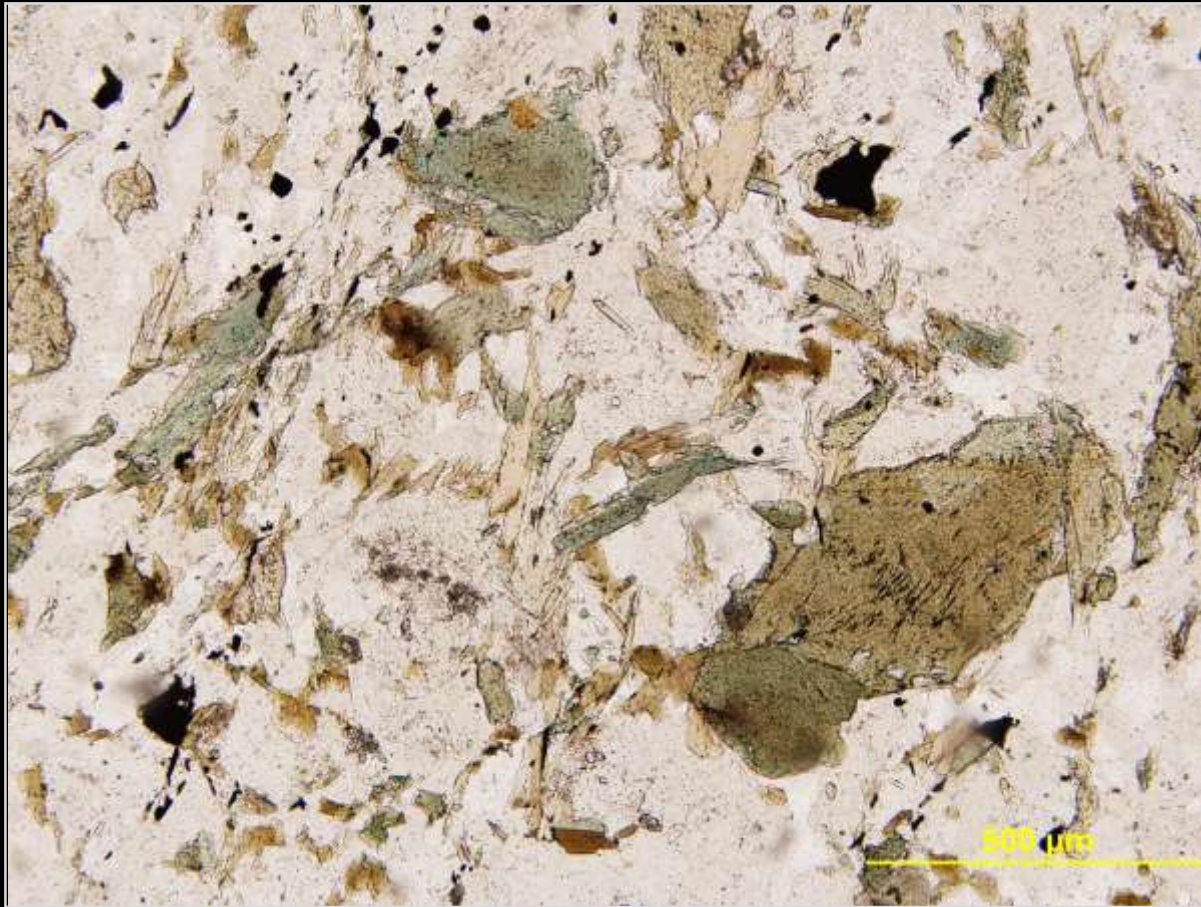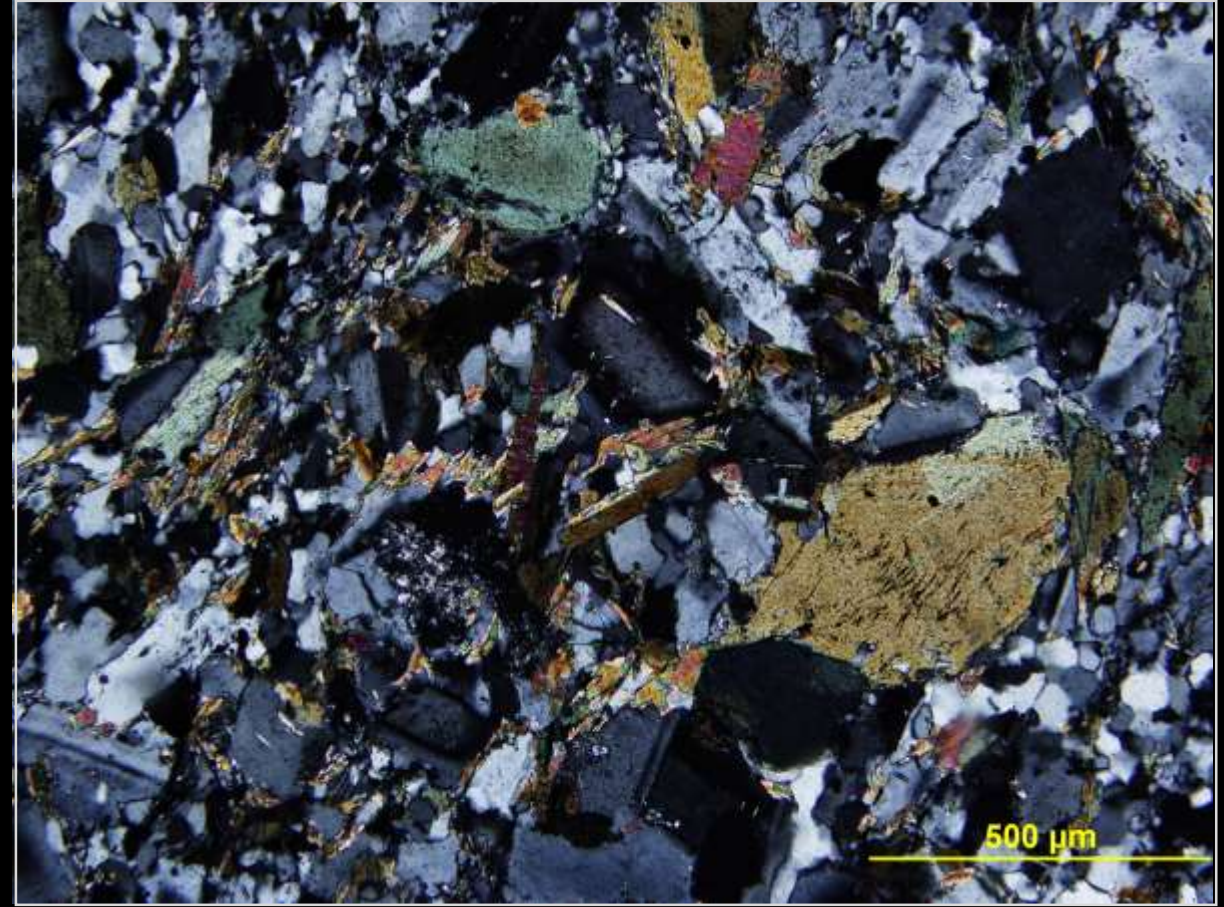

Plane transmitted and cross polarized light microphotographs

# Sample 5A-32R-2C

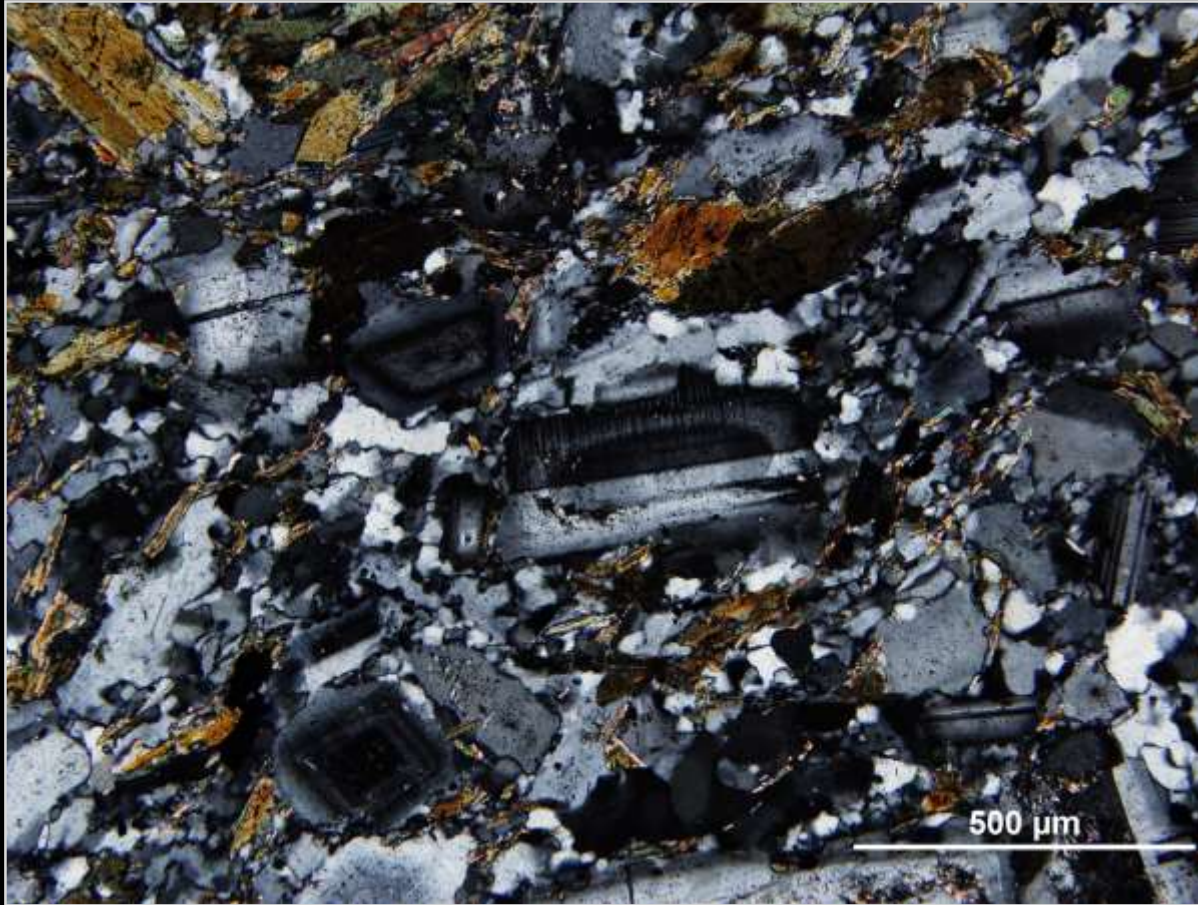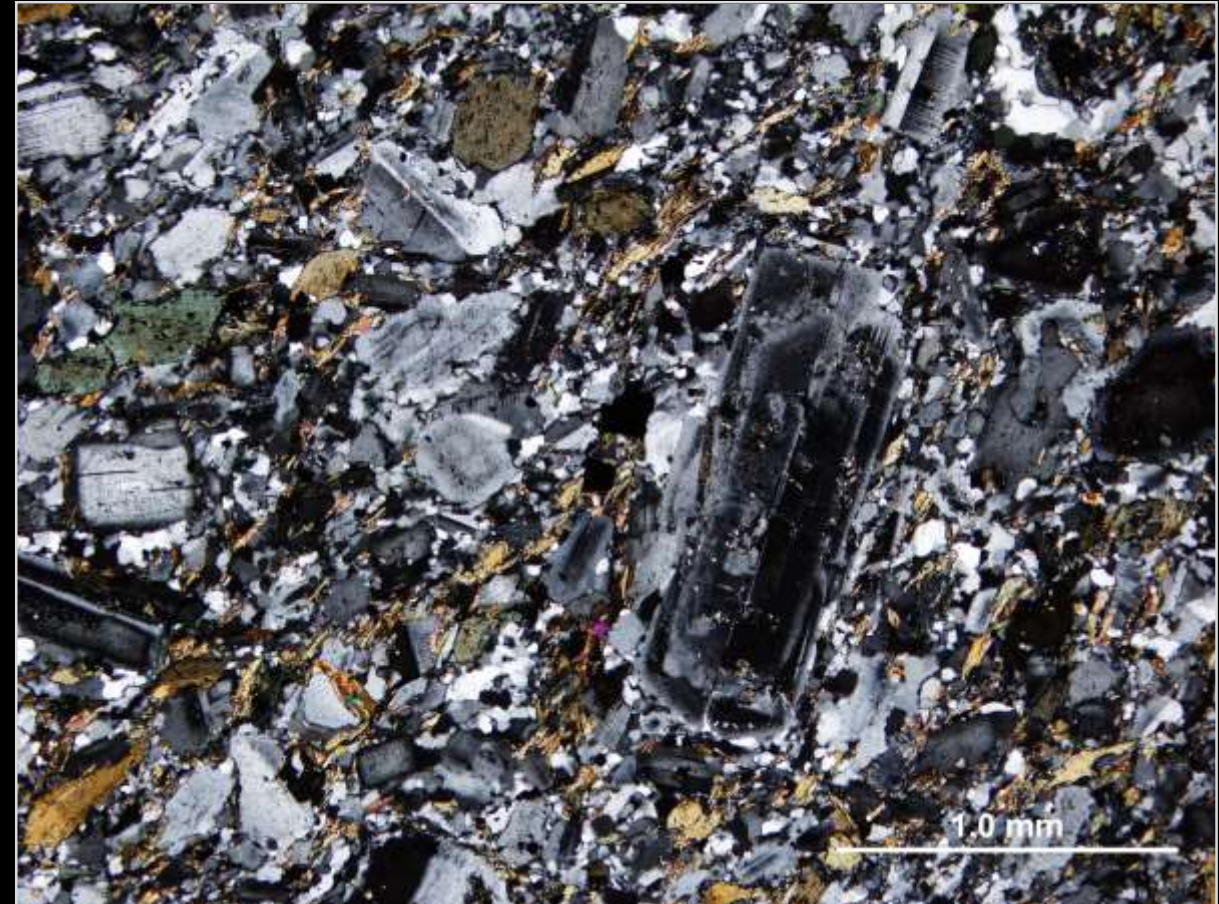

Cross polarized light microphotographs

# Sample 5G-35D-2B

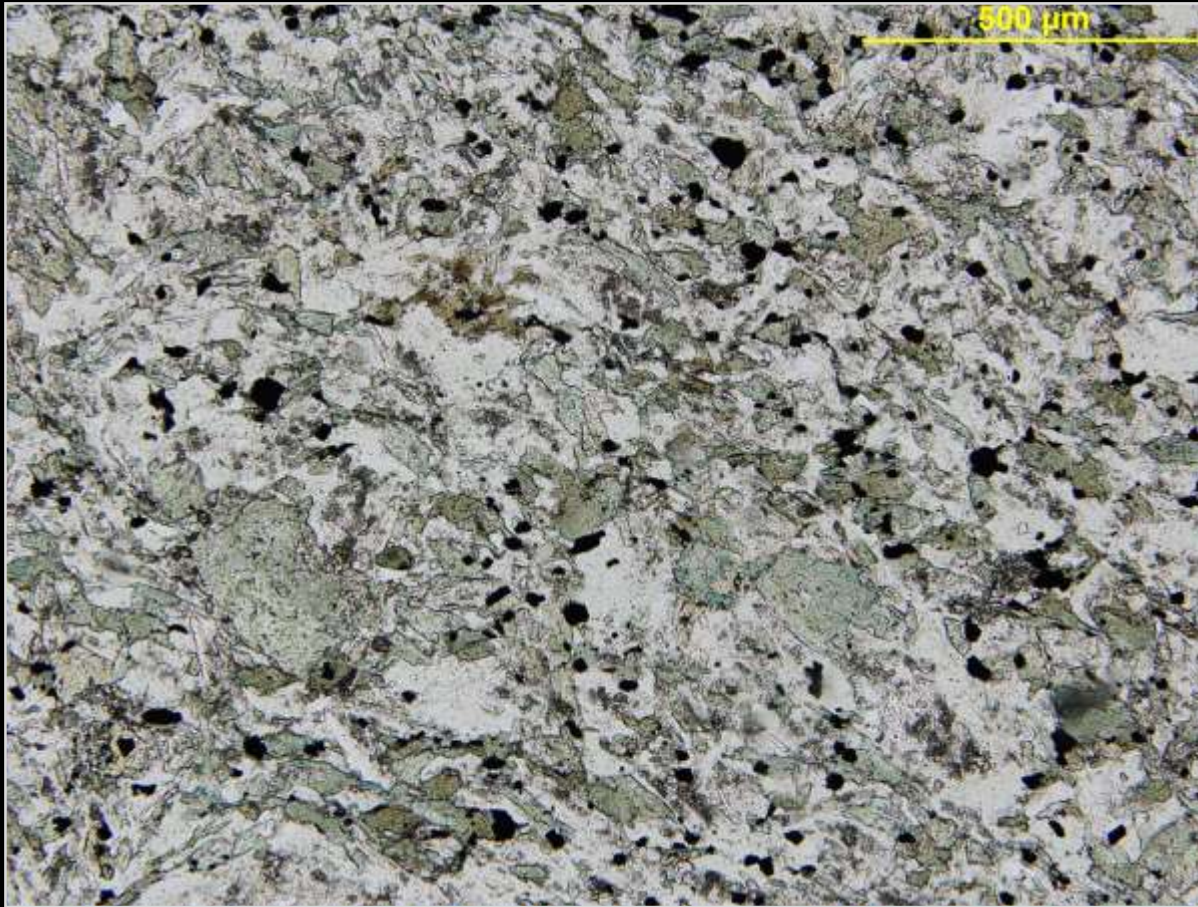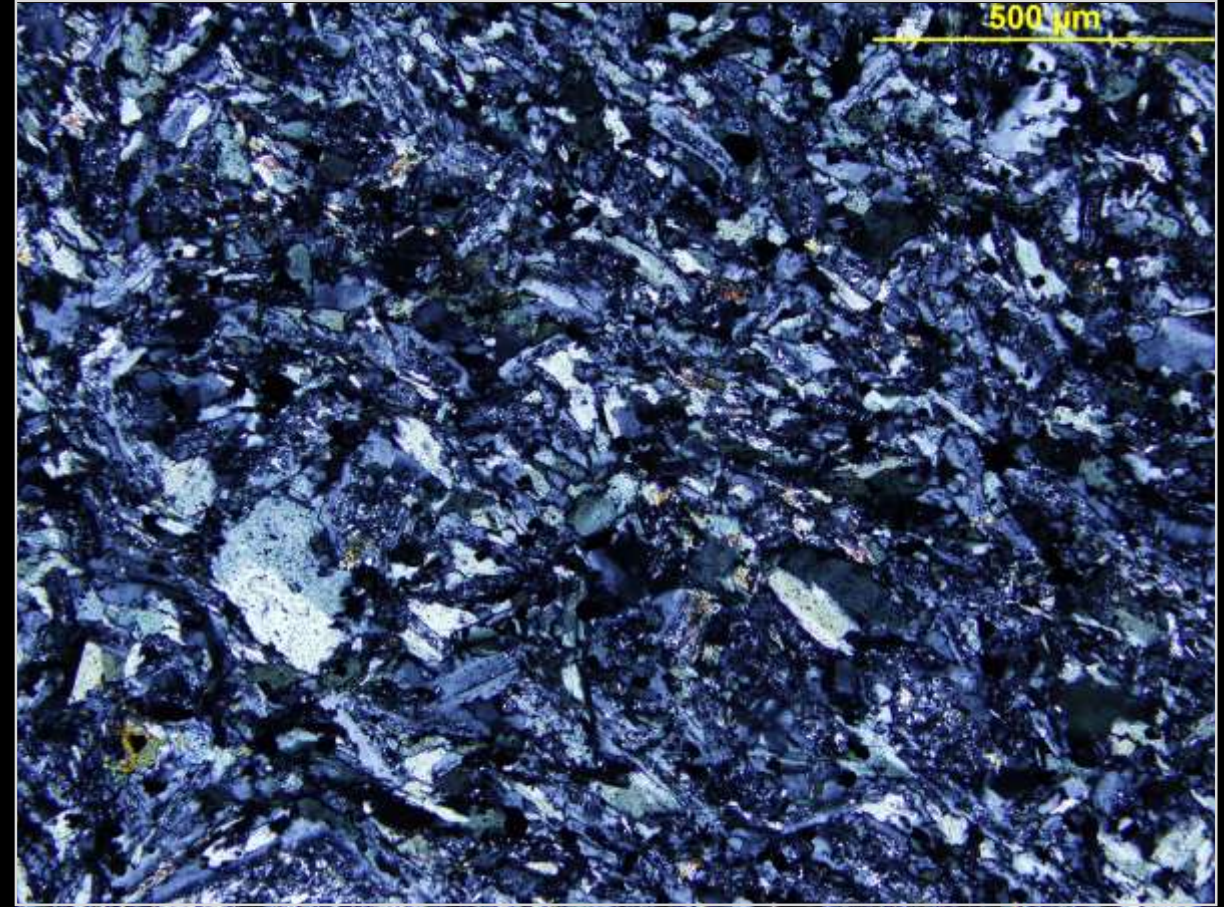

Plane transmitted and cross polarized light microphotographs

# Sample 6C-8D-6

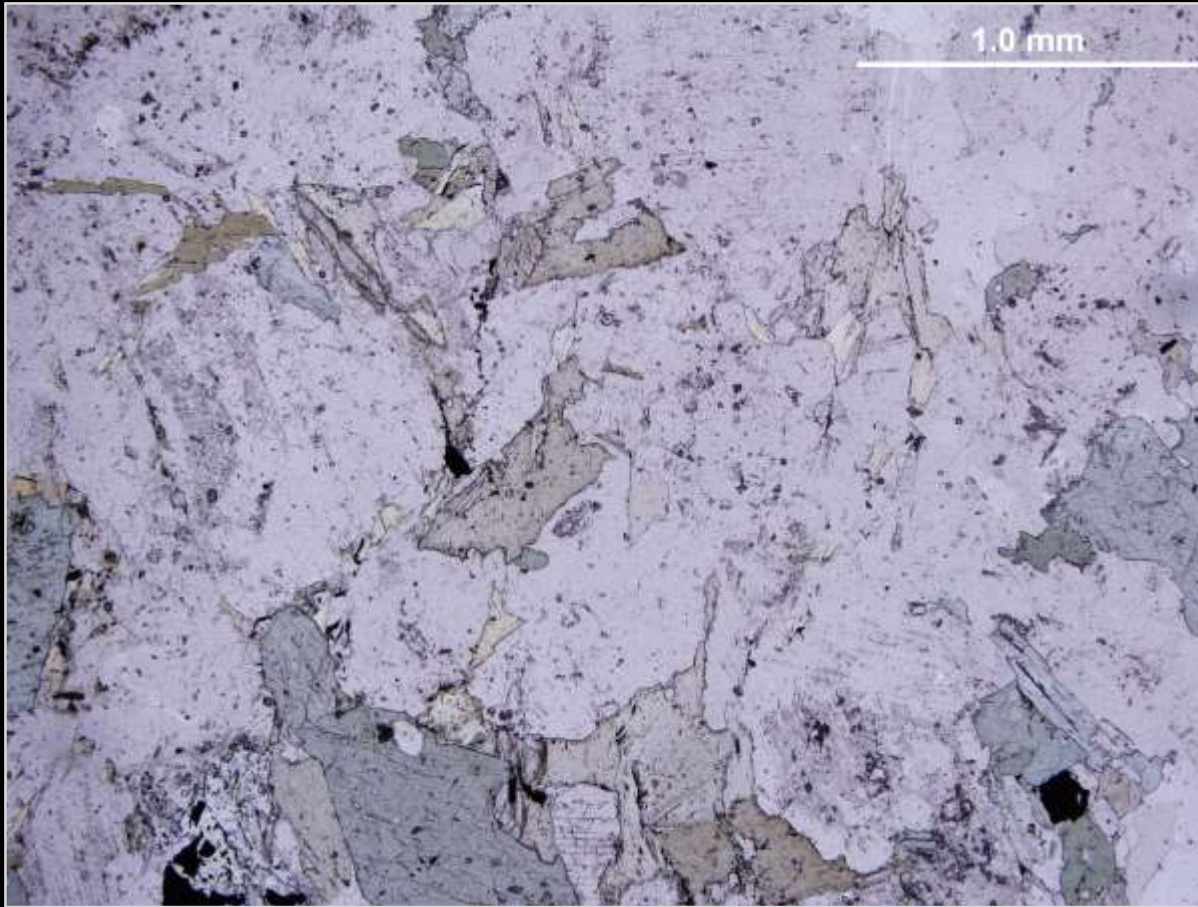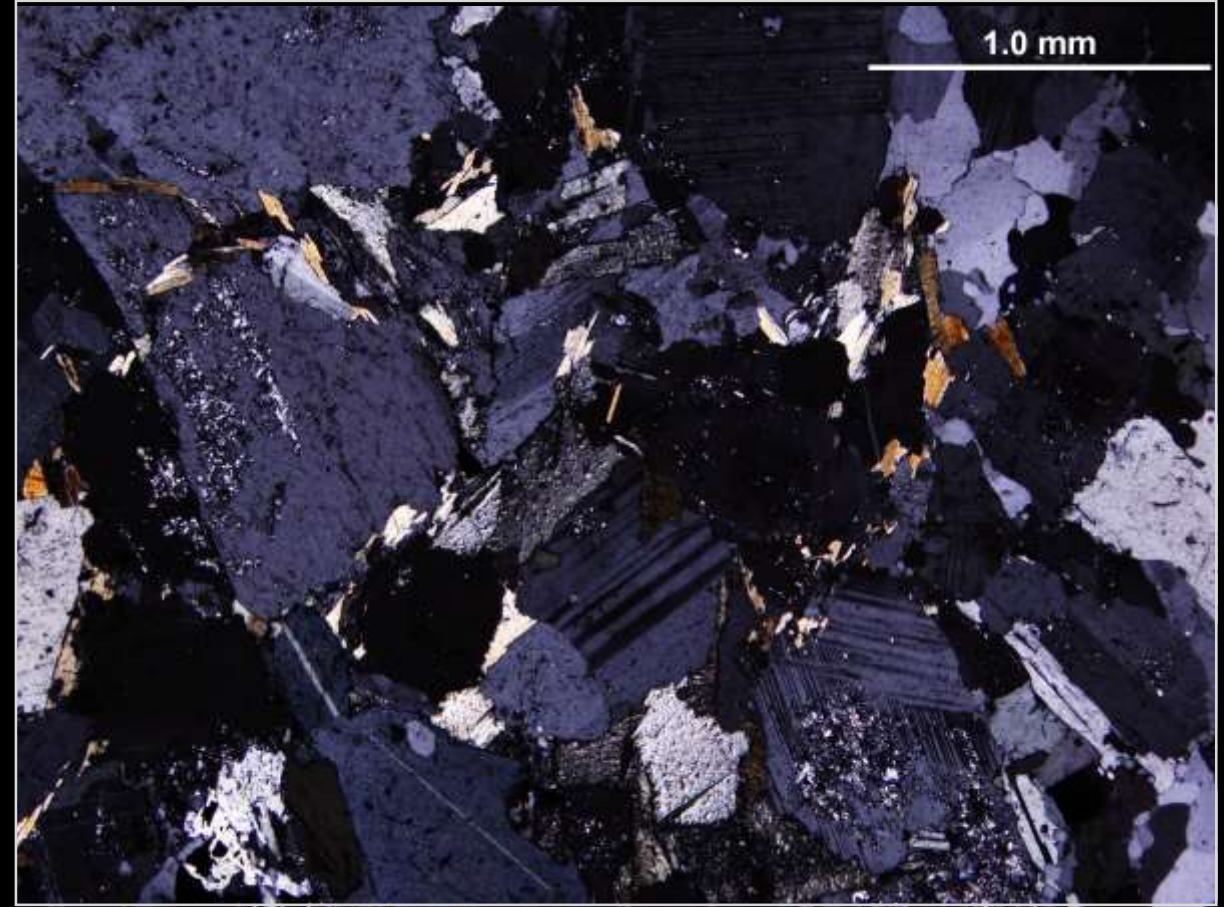

Plane transmitted and cross polarized light microphotographs

# Sample 6C-15D-4G

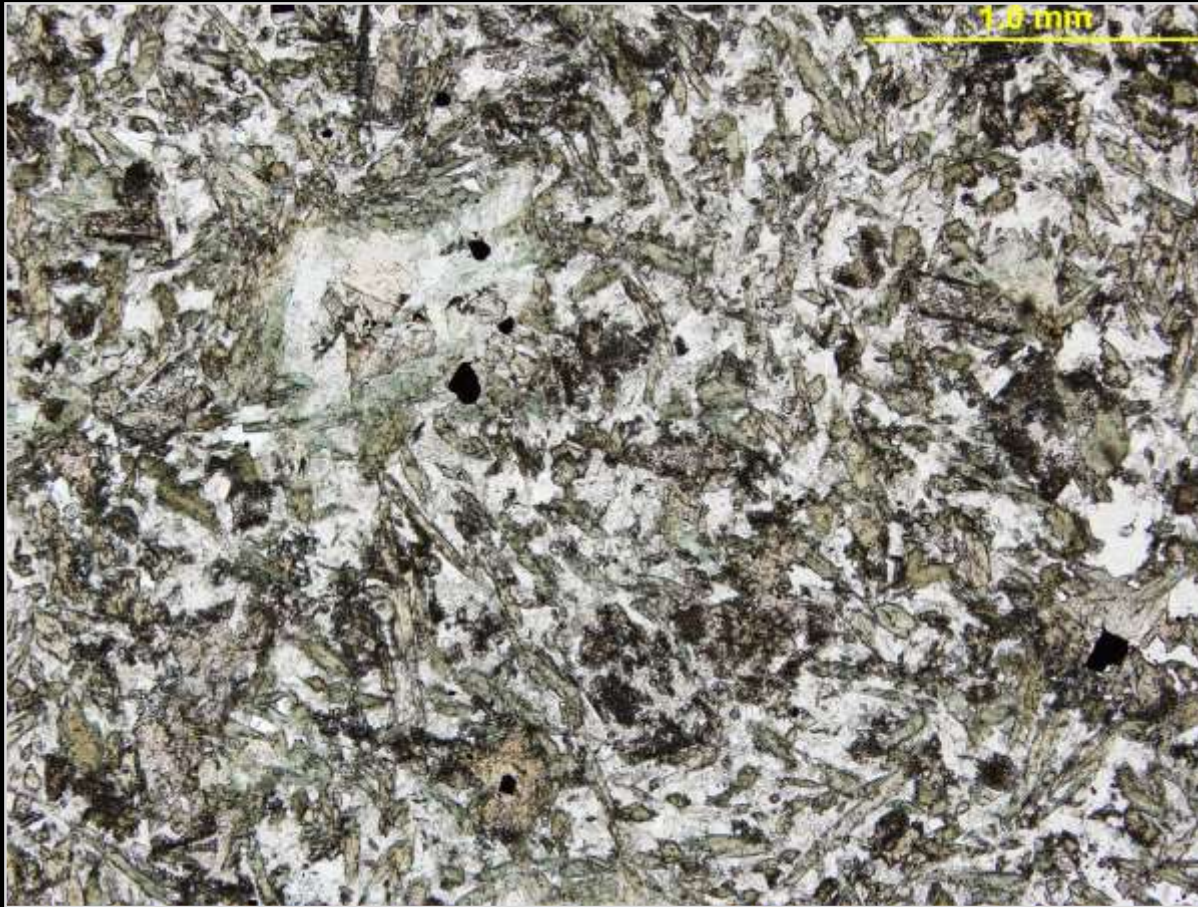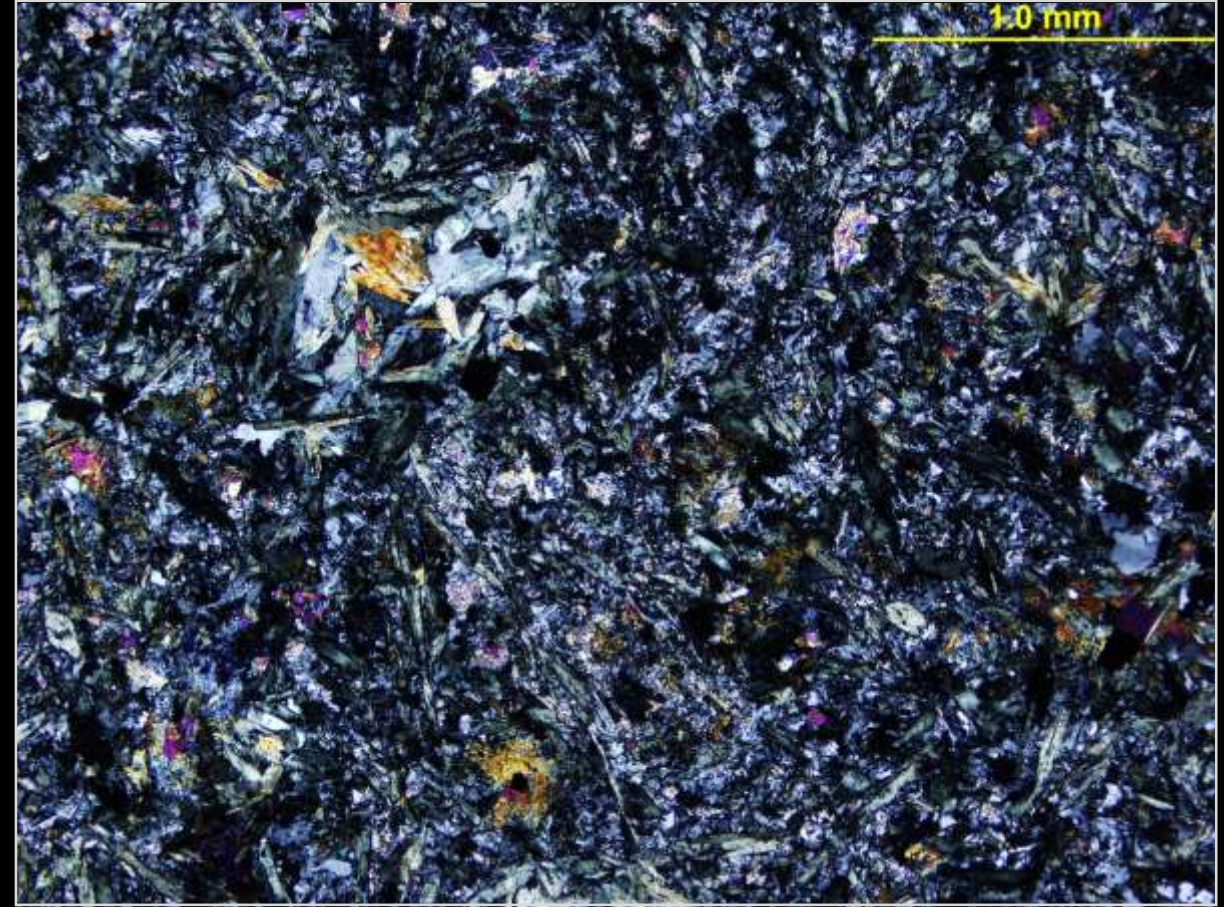

Plane transmitted and cross polarized light microphotographs

# Sample 6F-22D-6A

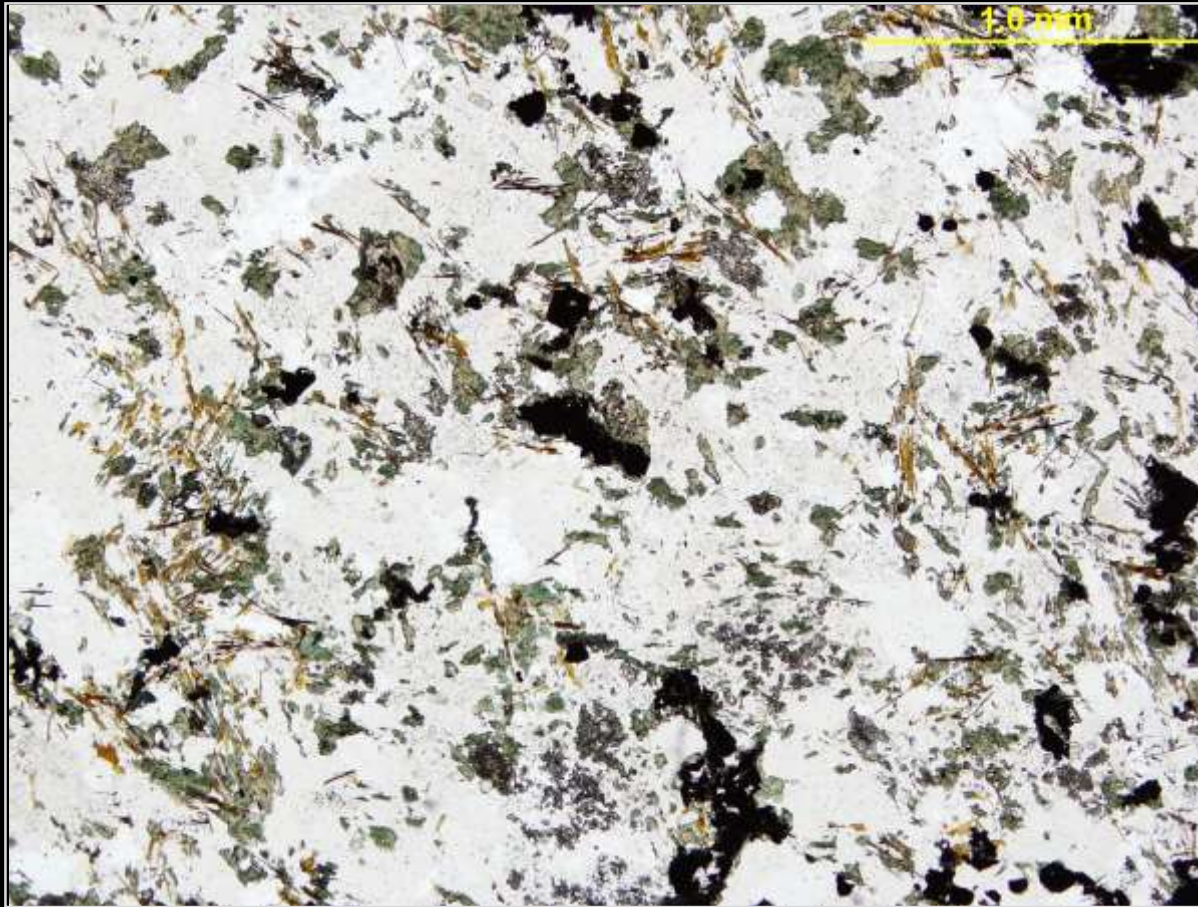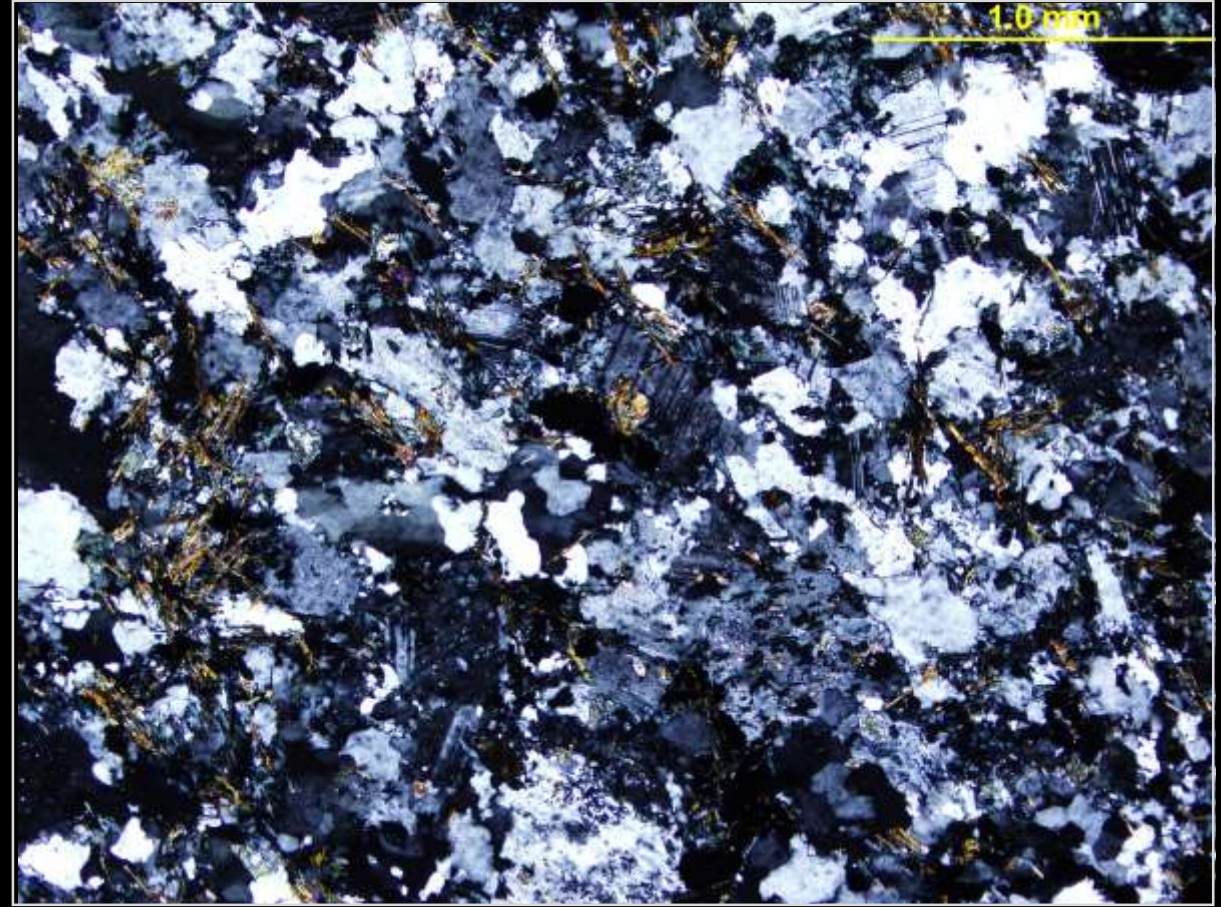

Plane transmitted and cross polarized light microphotographs

# Sample PLD-6-1

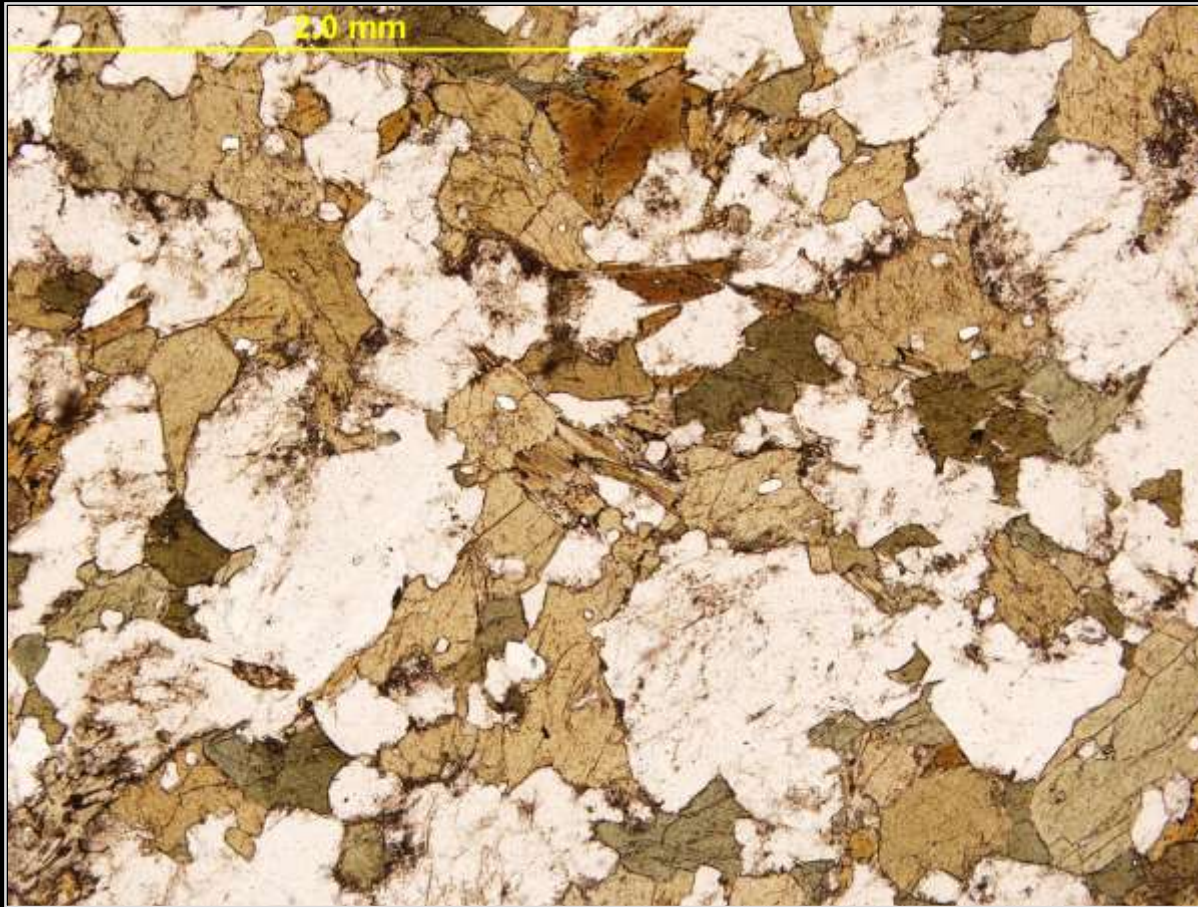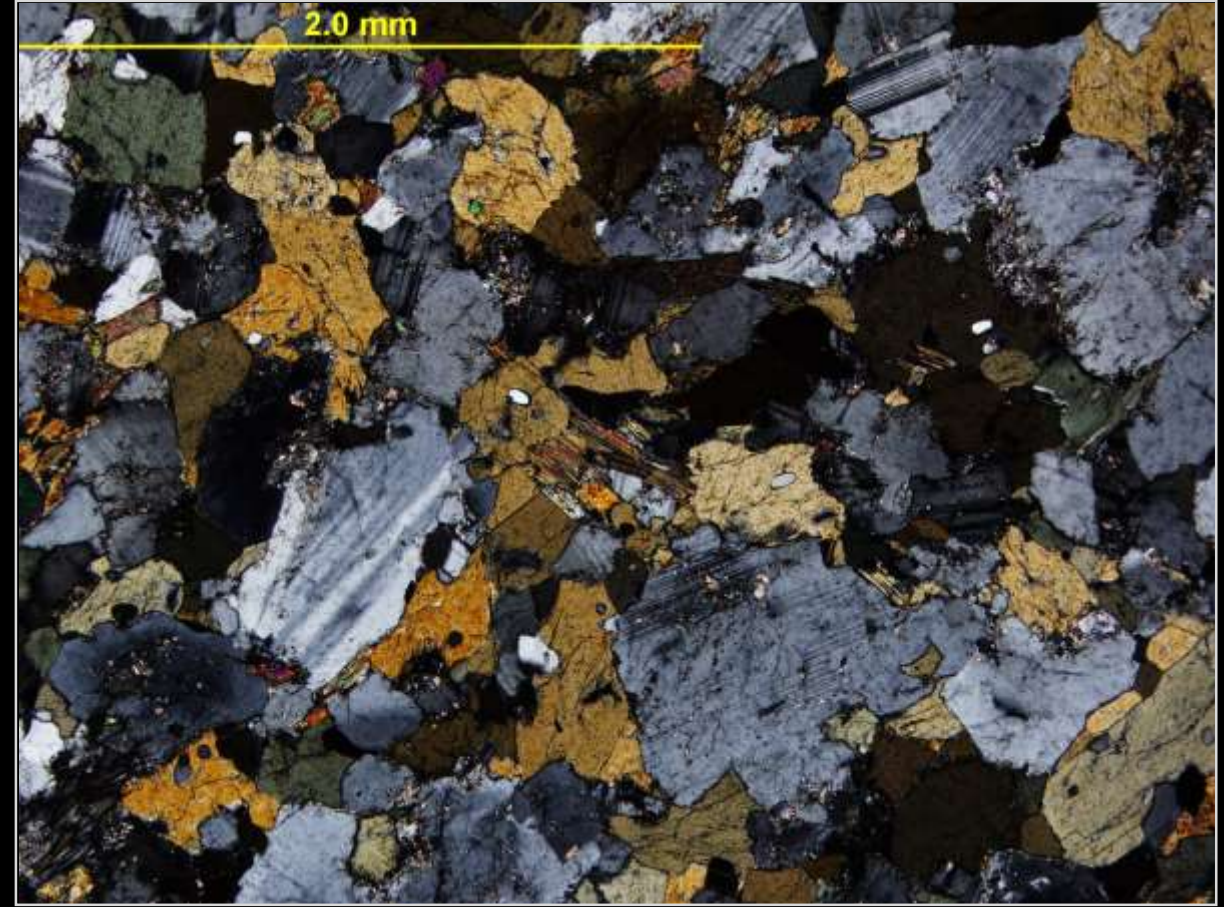

Plane transmitted and cross polarized light microphotographs

# Sample PLD-6-1

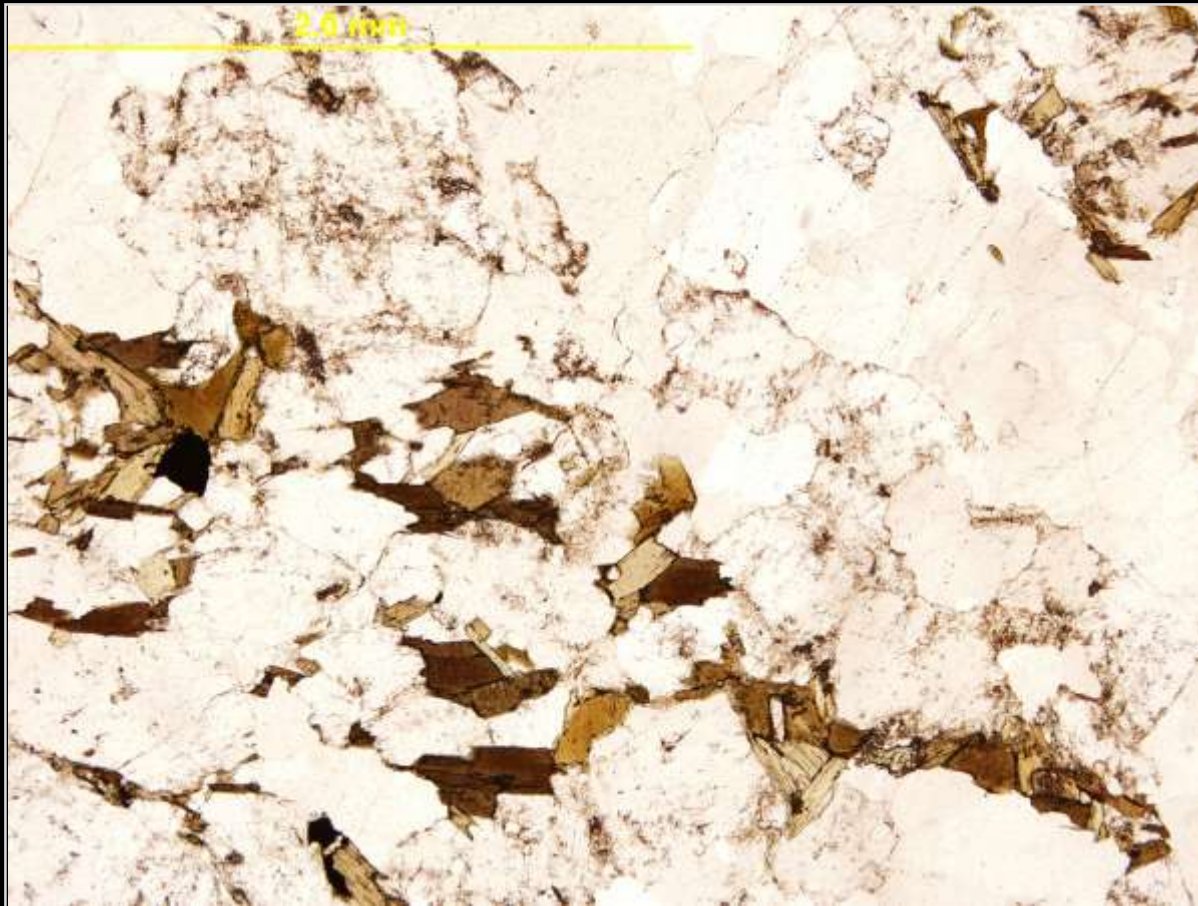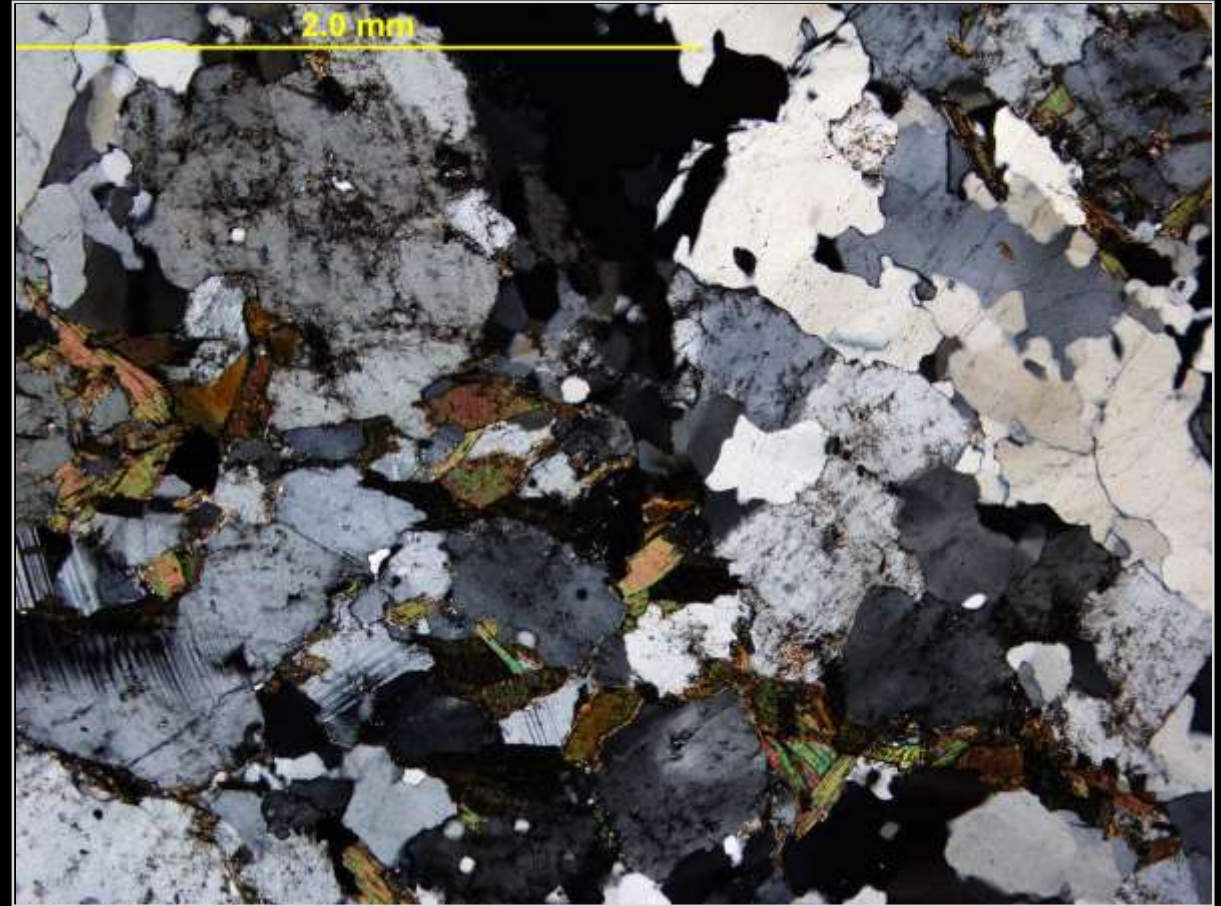

Plane transmitted and cross polarized light microphotographs

# Sample PLD-6-1

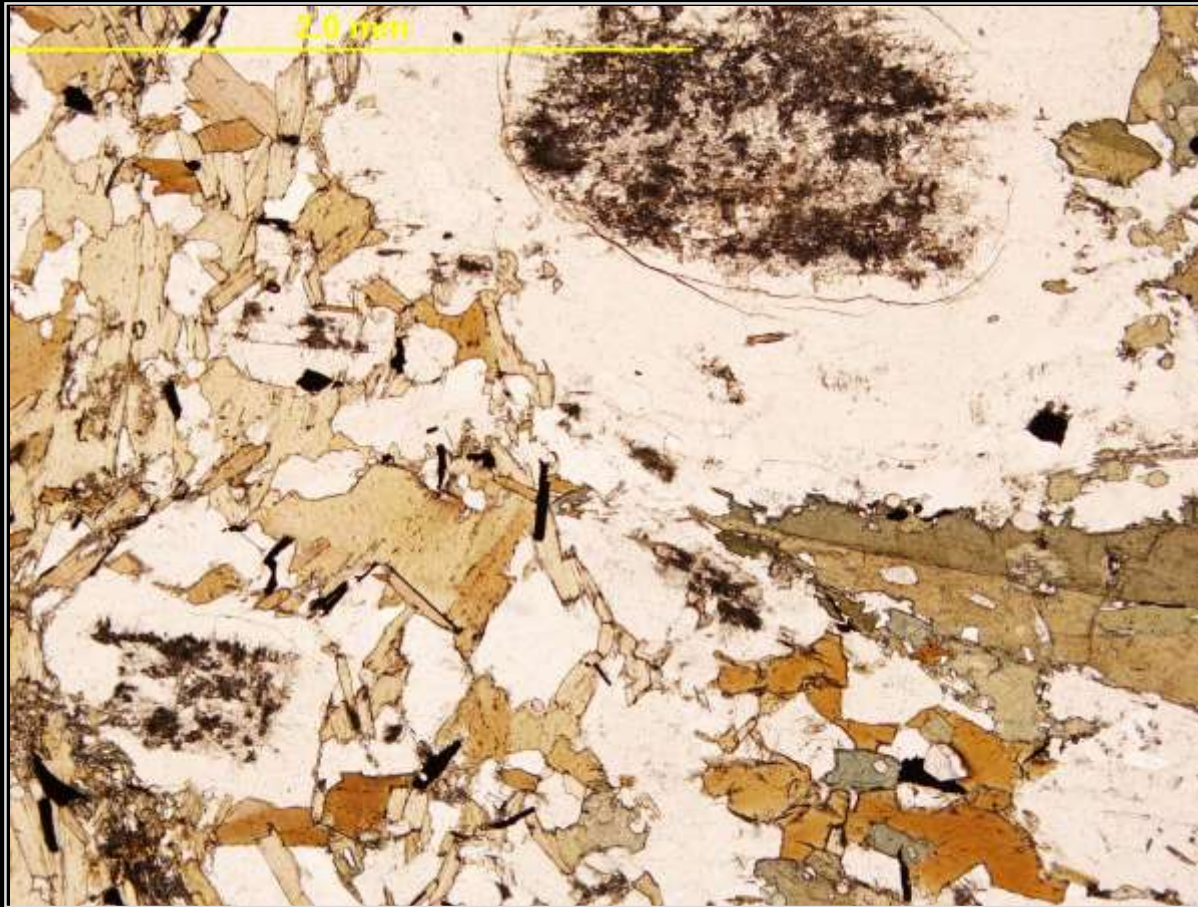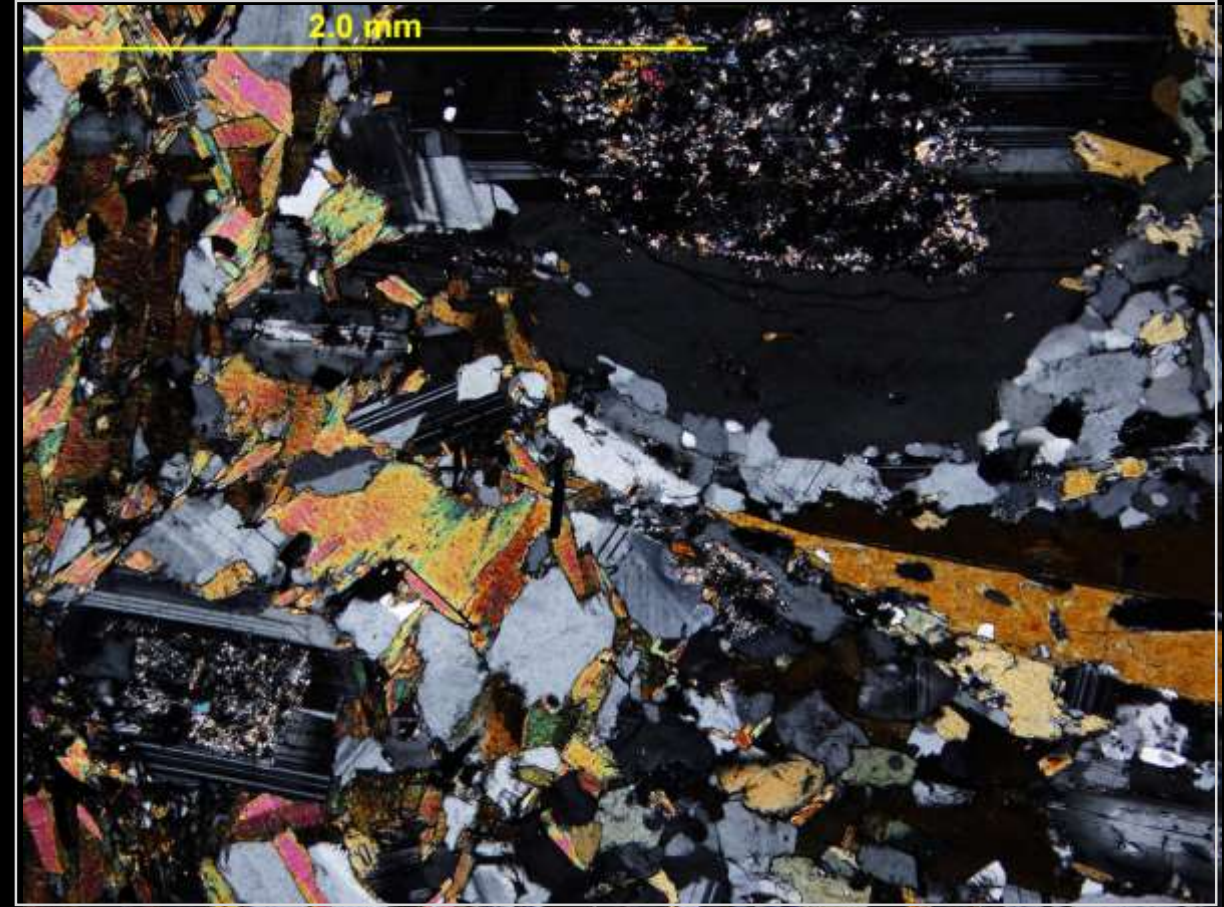

Plane transmitted and cross polarized light microphotographs

# Sample PLD-29-8

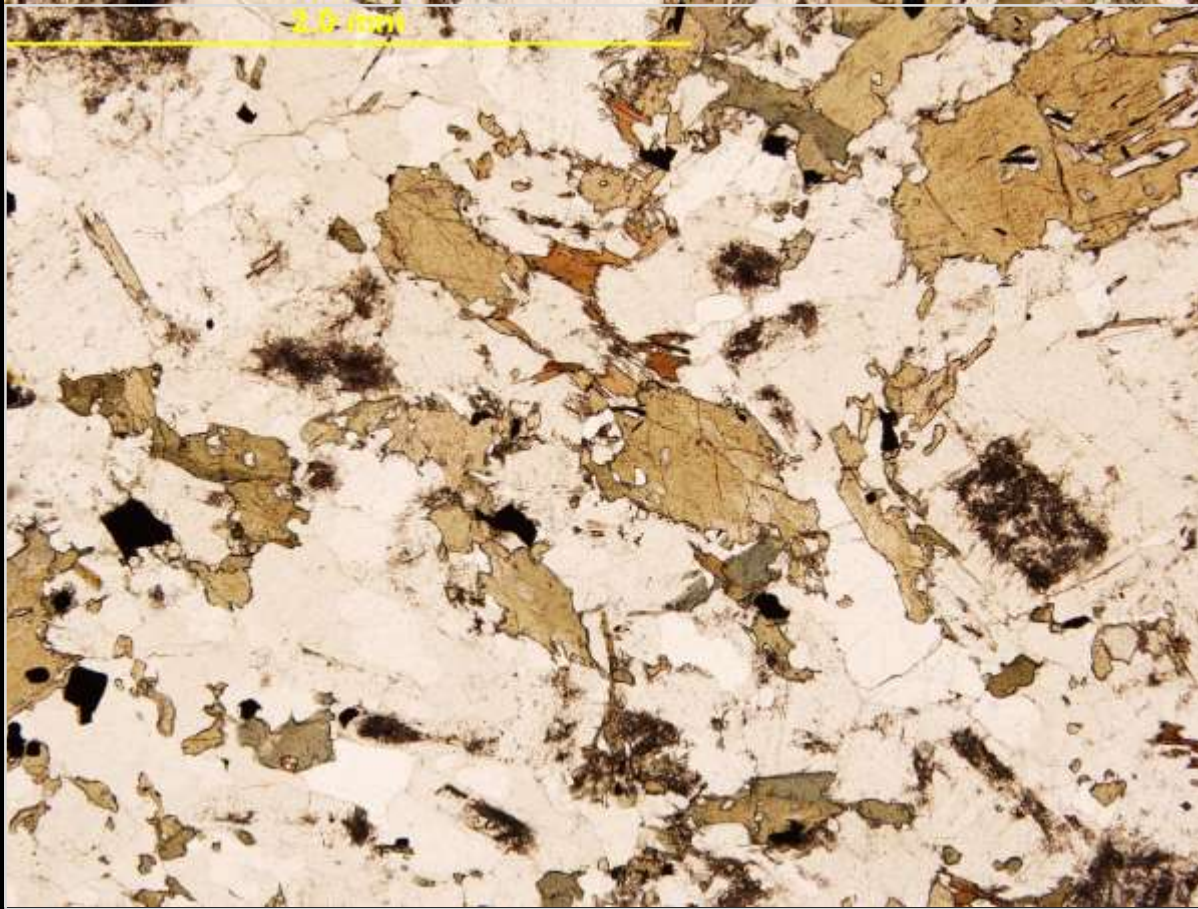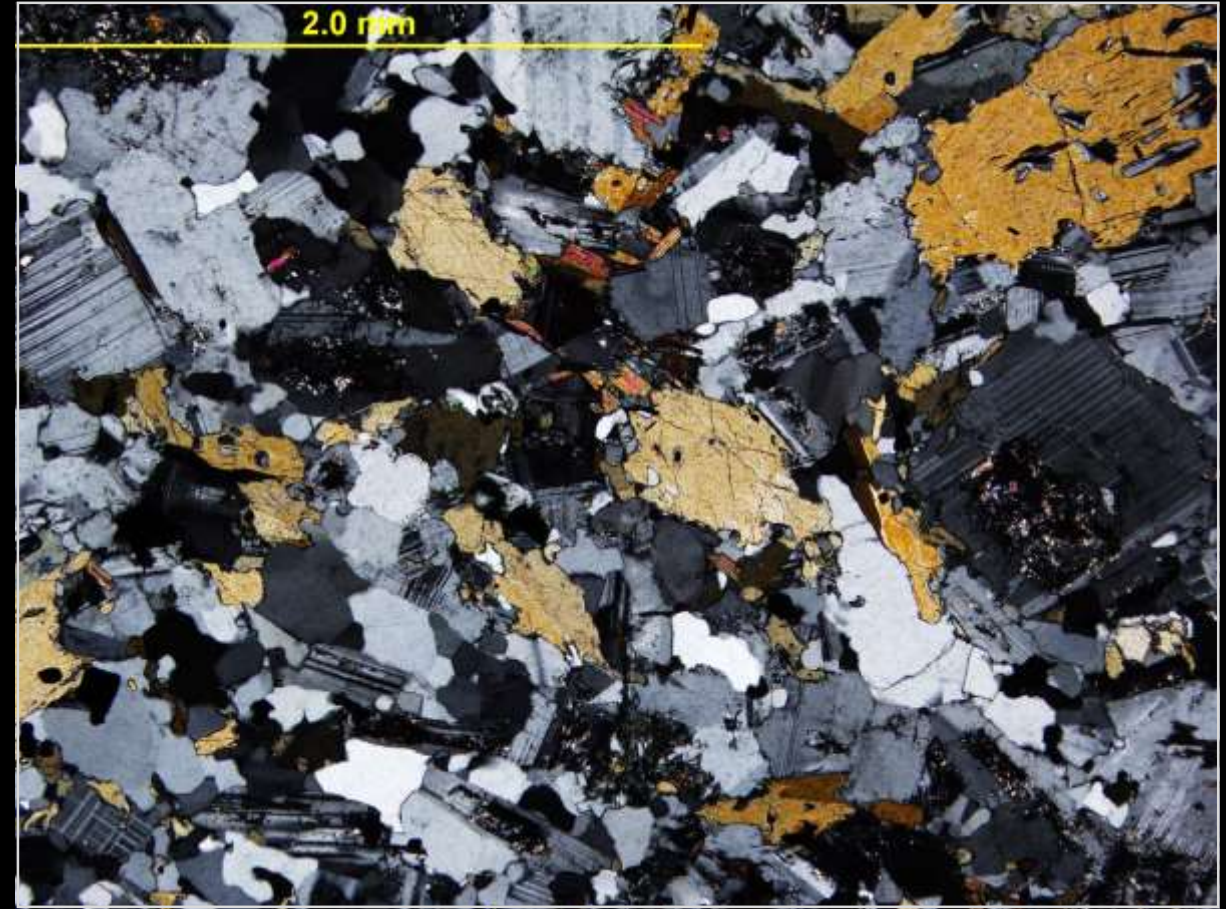

Plane transmitted and cross polarized light microphotographs

# Sample PLD-30-5A

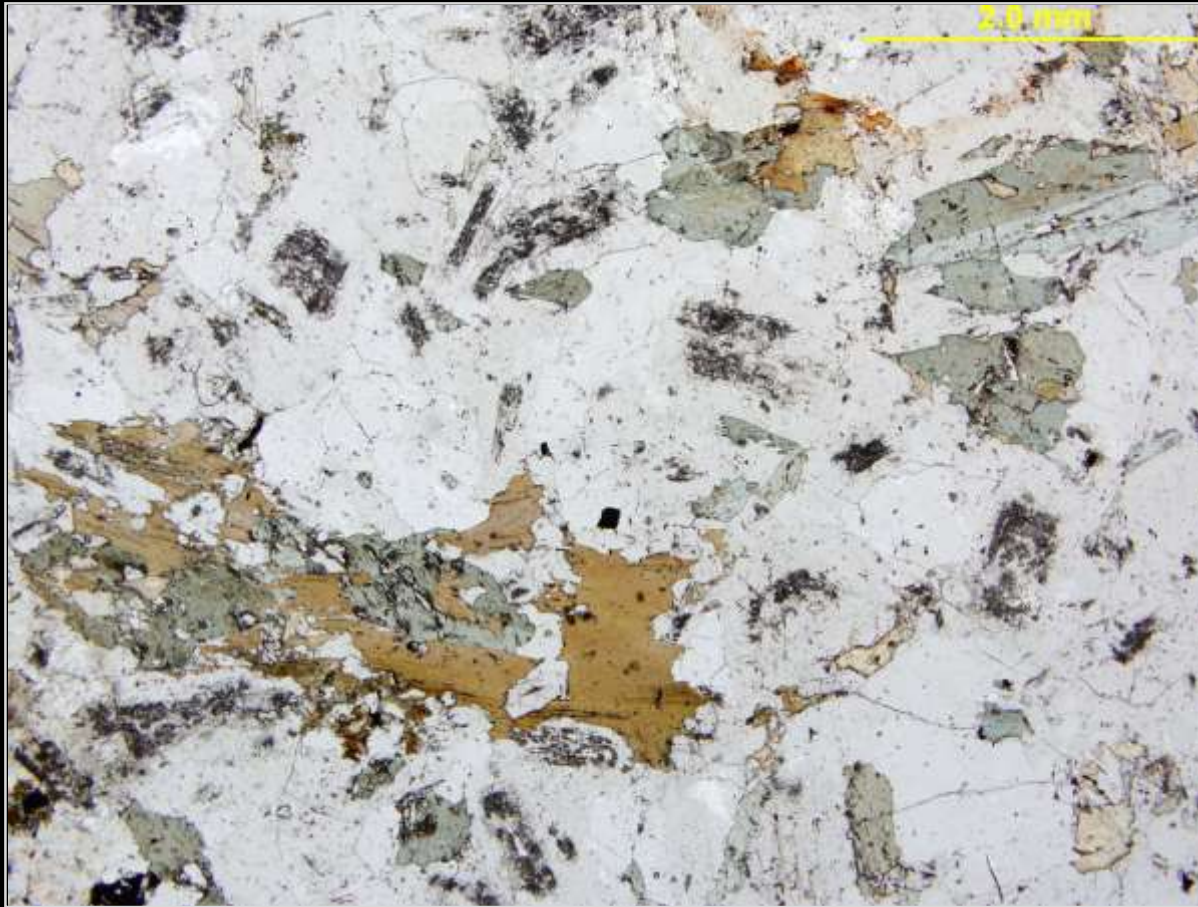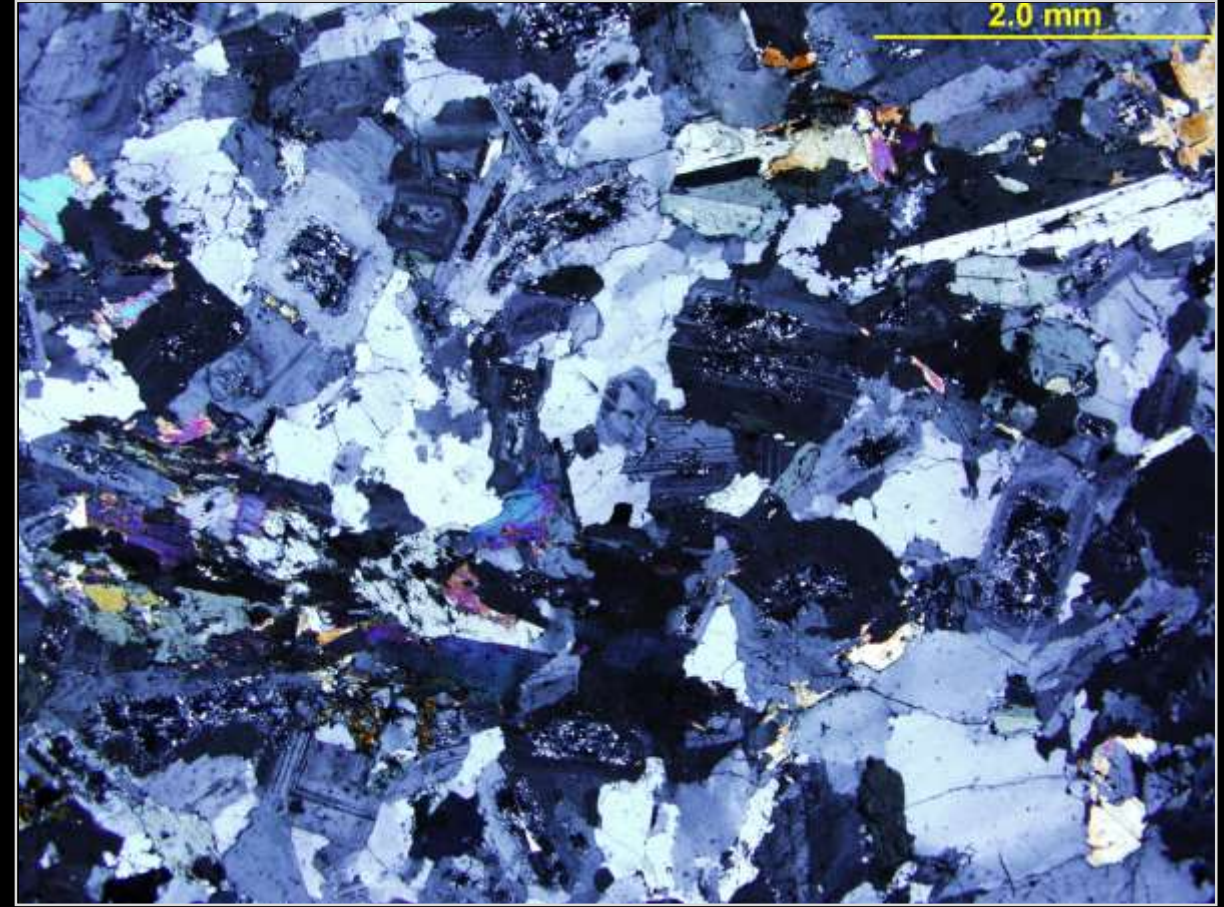

Plane transmitted and cross polarized light microphotographs

# Sample PLD-31-6B

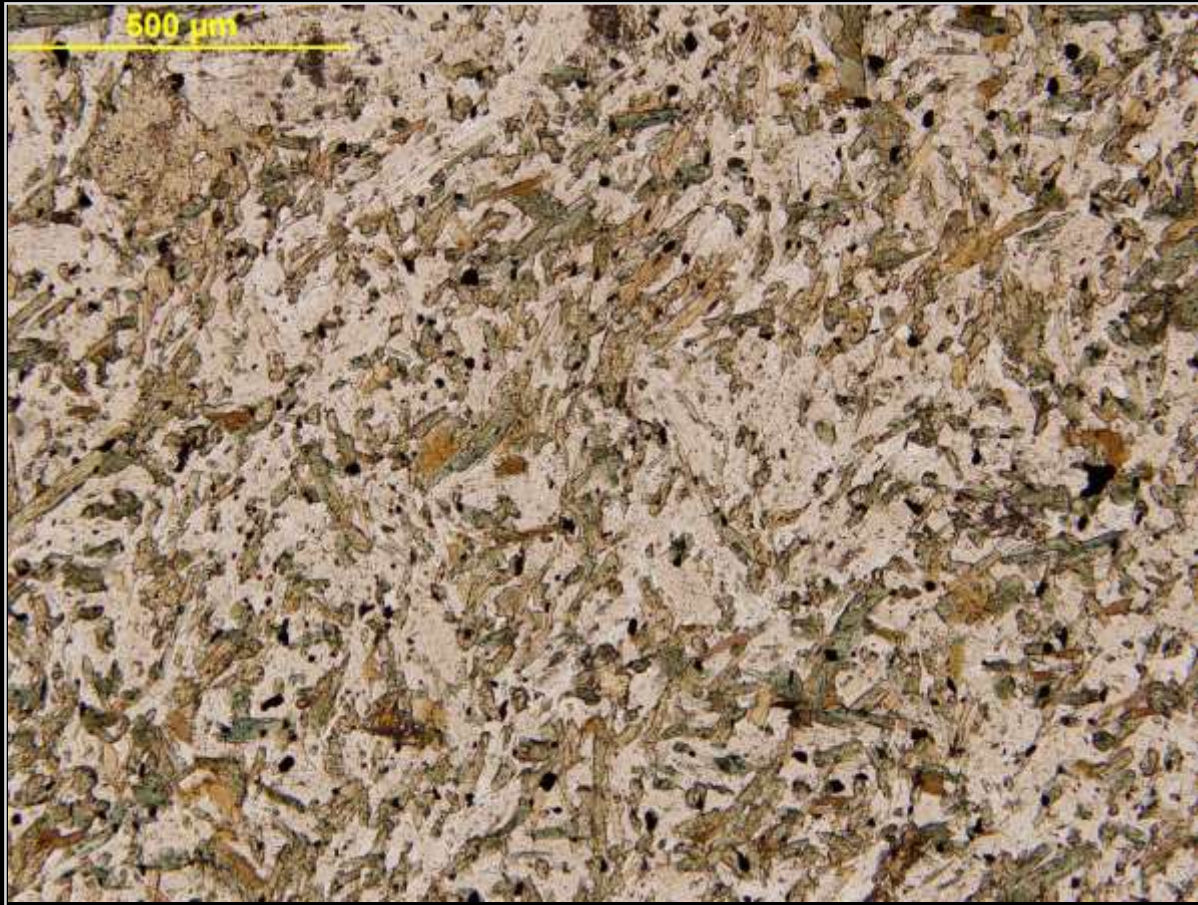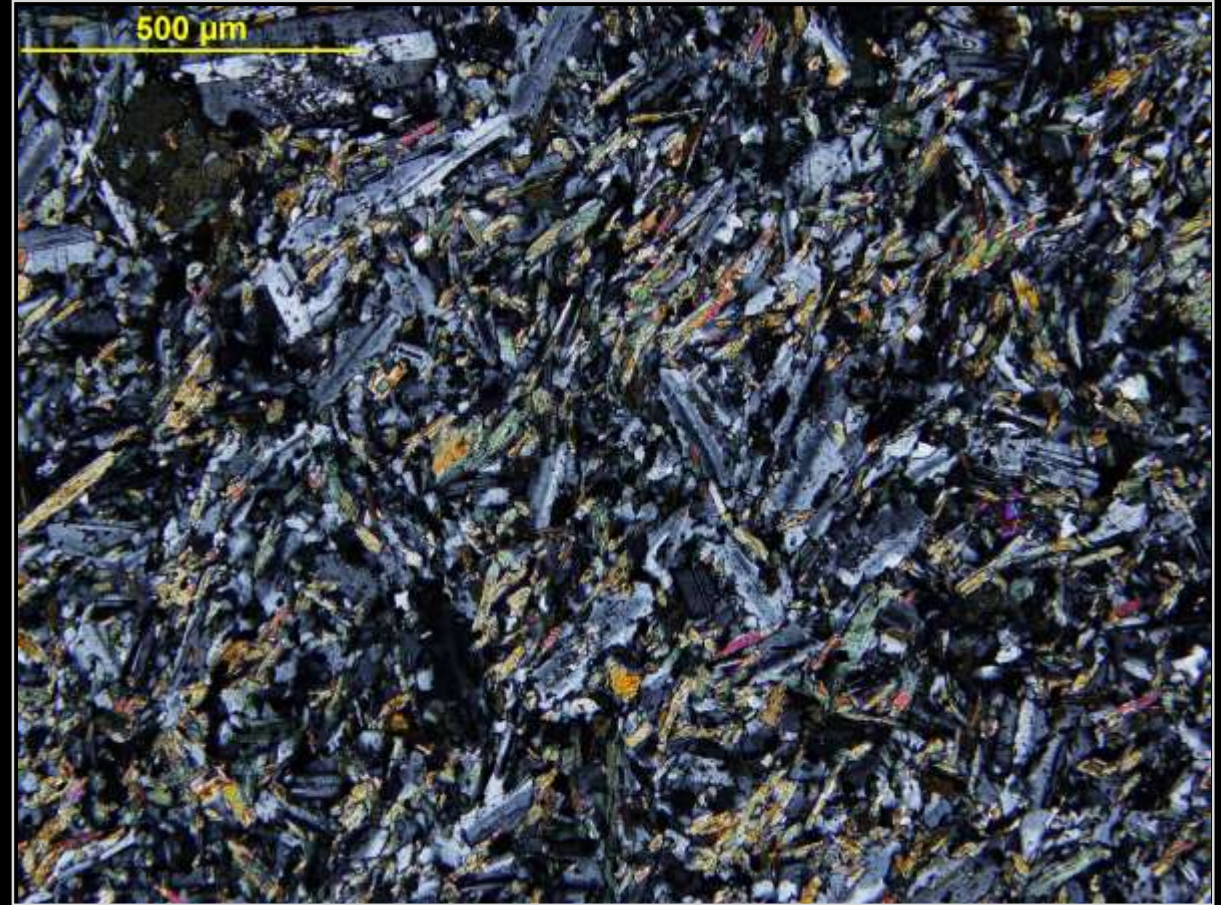

Plane transmitted and cross polarized light microphotographs

# Sample PLD-31-6B

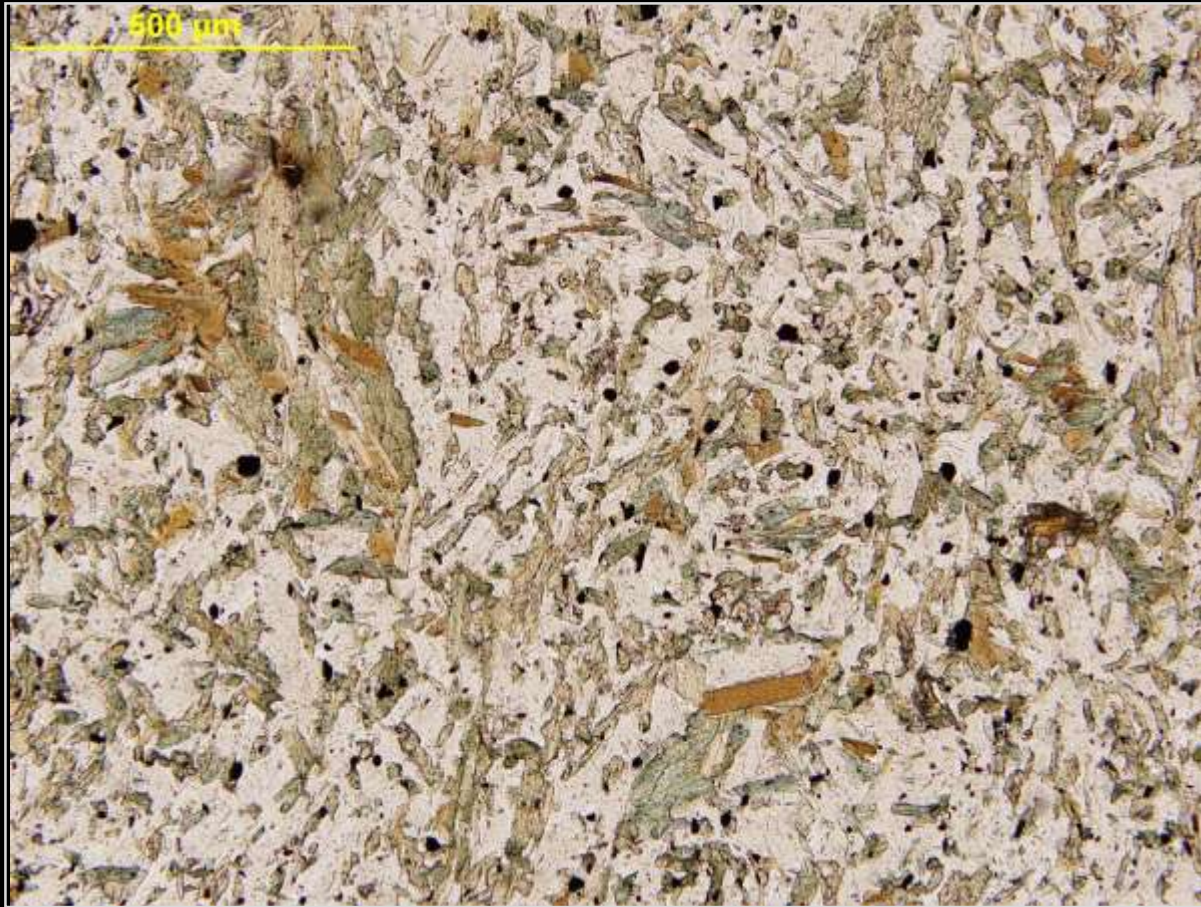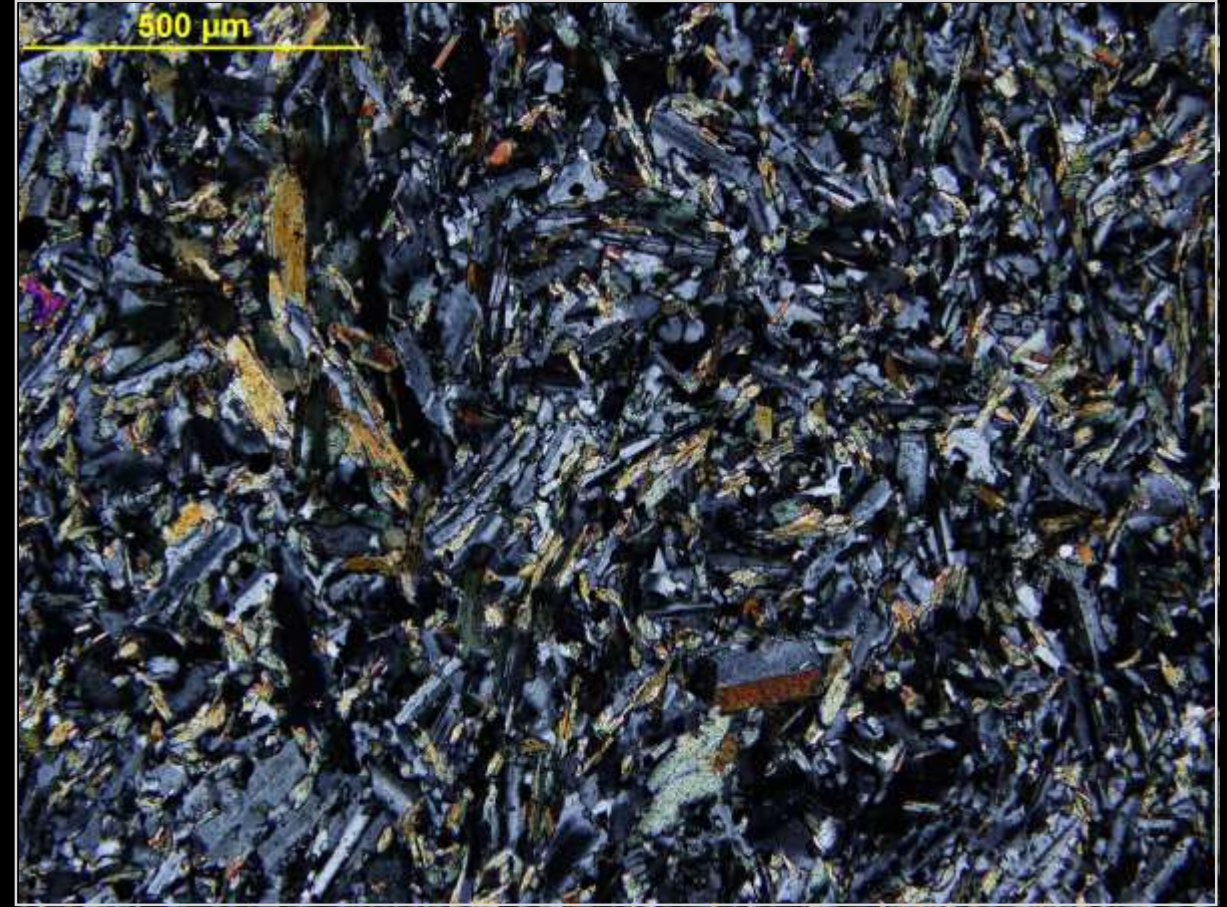

Plane transmitted and cross polarized light microphotographs

# Sample PLD-31-6B

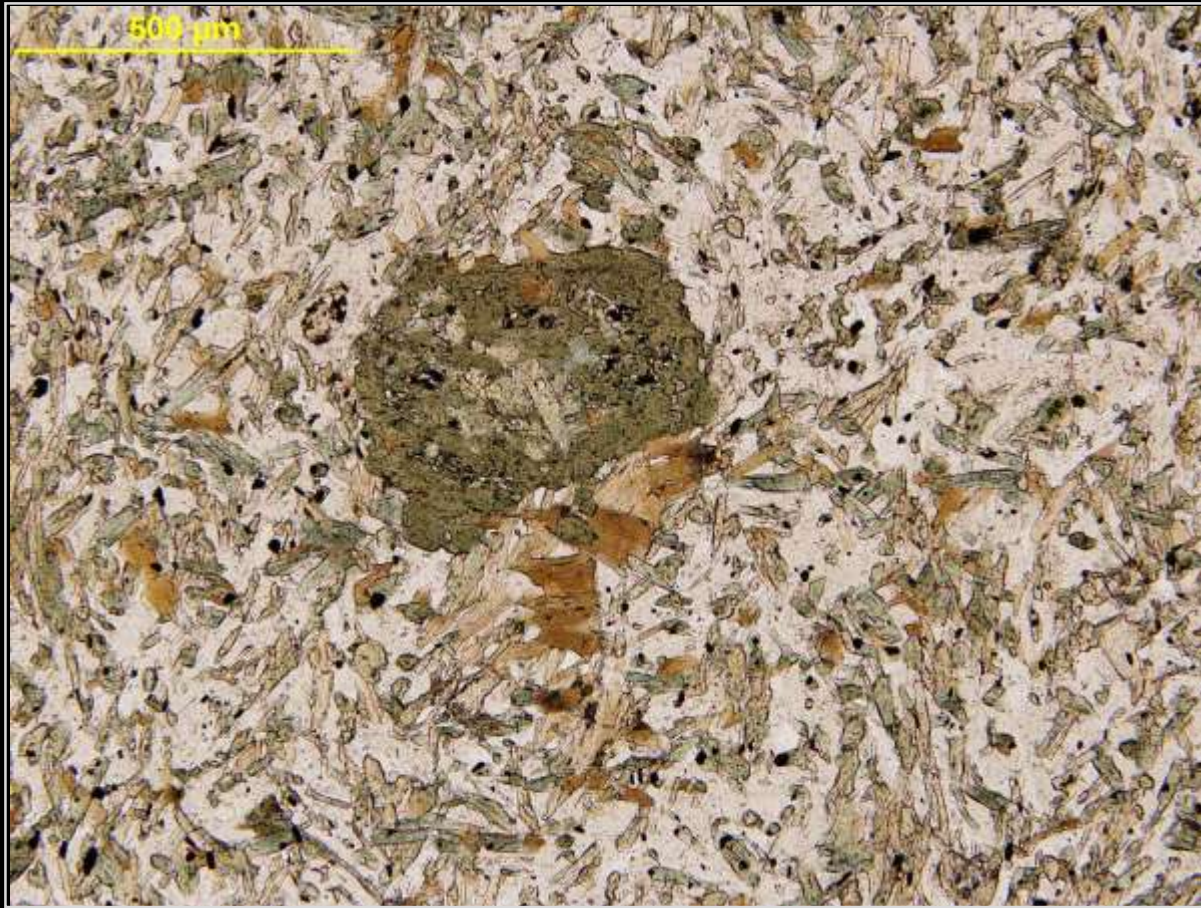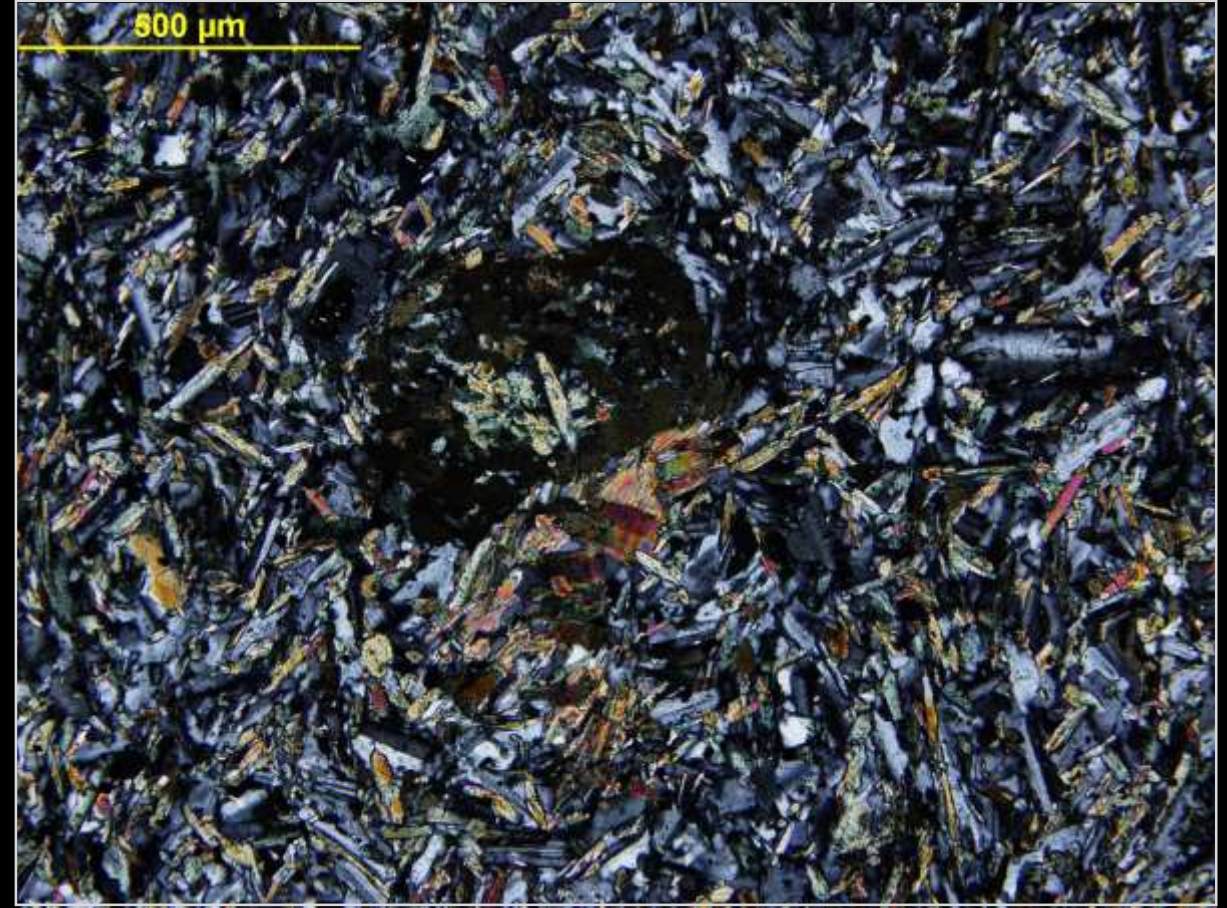

Plane transmitted and cross polarized light microphotographs

# Sample PMD-8-4

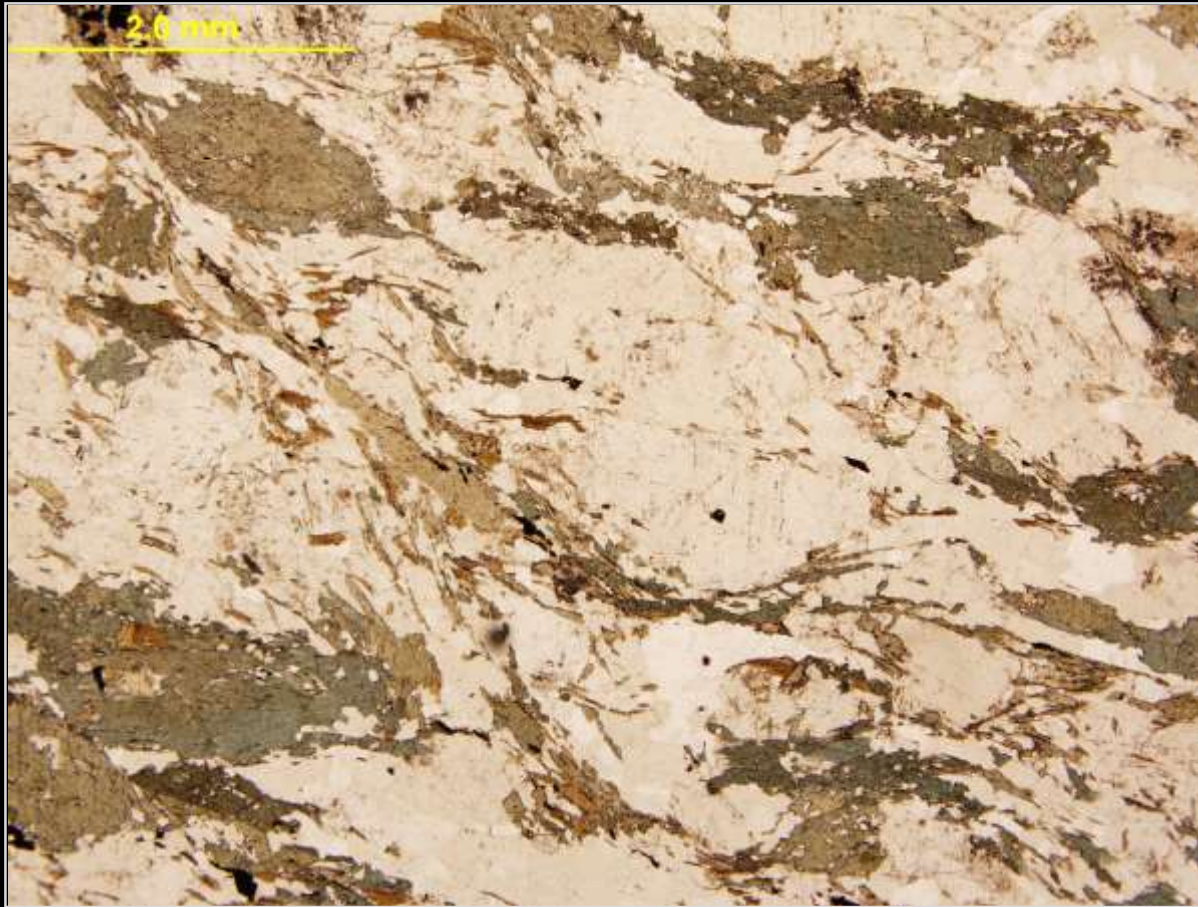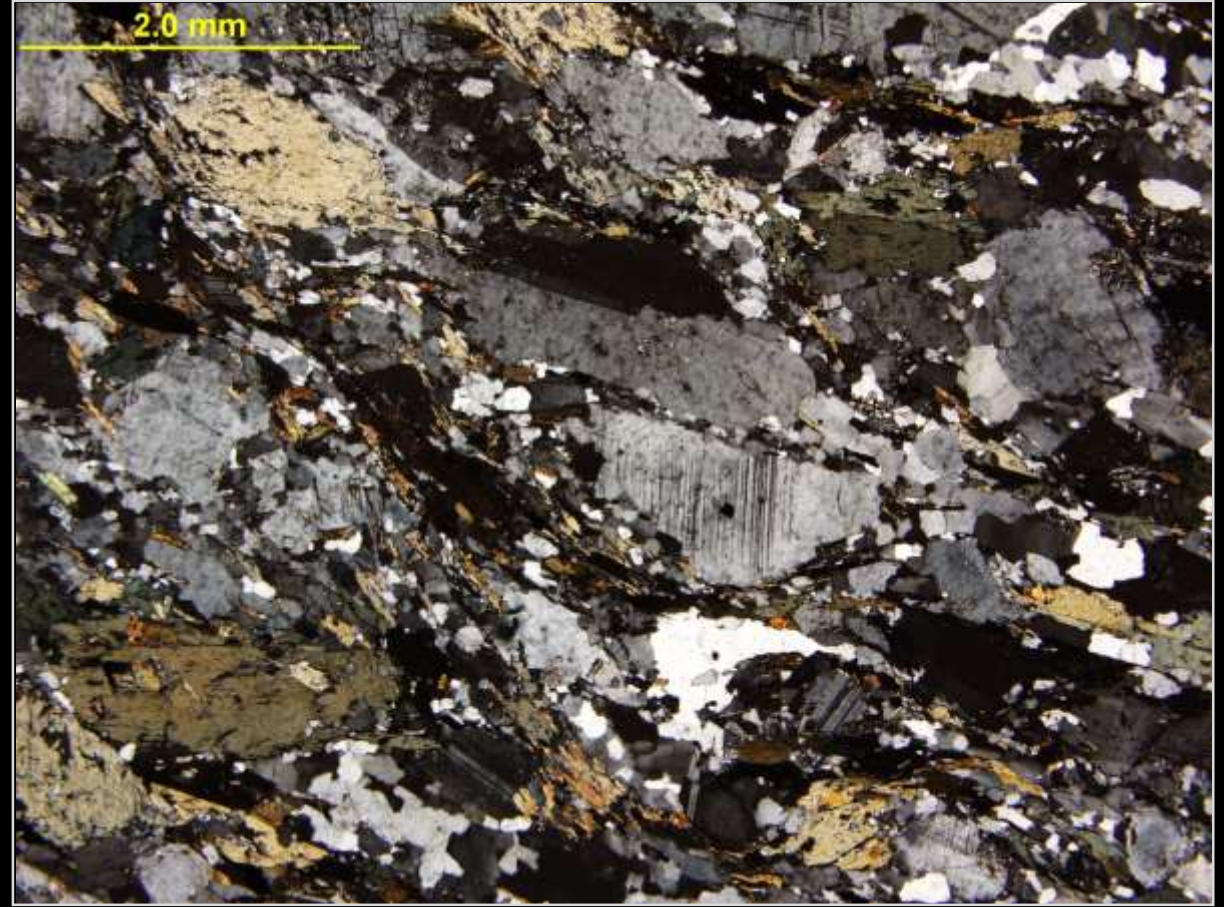

Plane transmitted and cross polarized light microphotographs

# Sample PMD-8-4

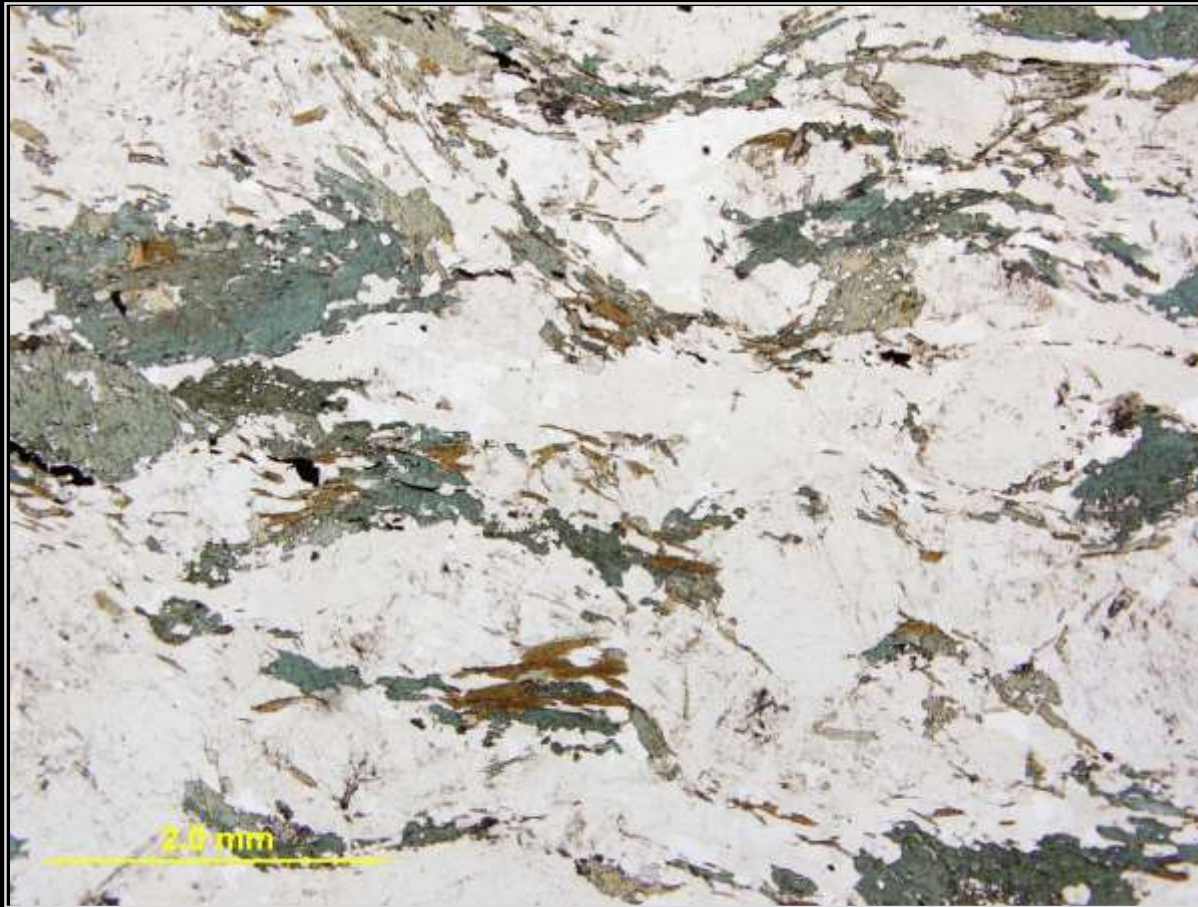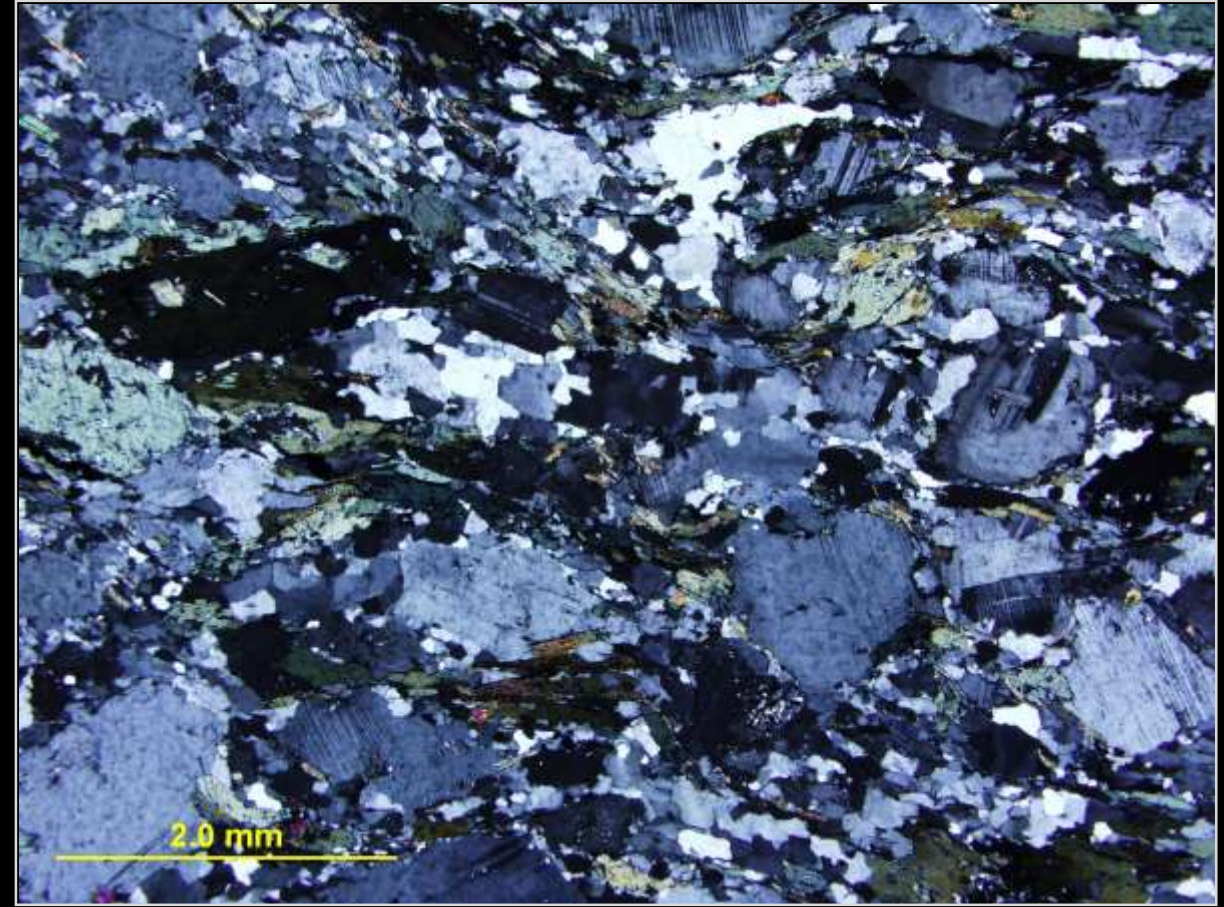

Plane transmitted and cross polarized light microphotographs

# Sample PMD-9-5

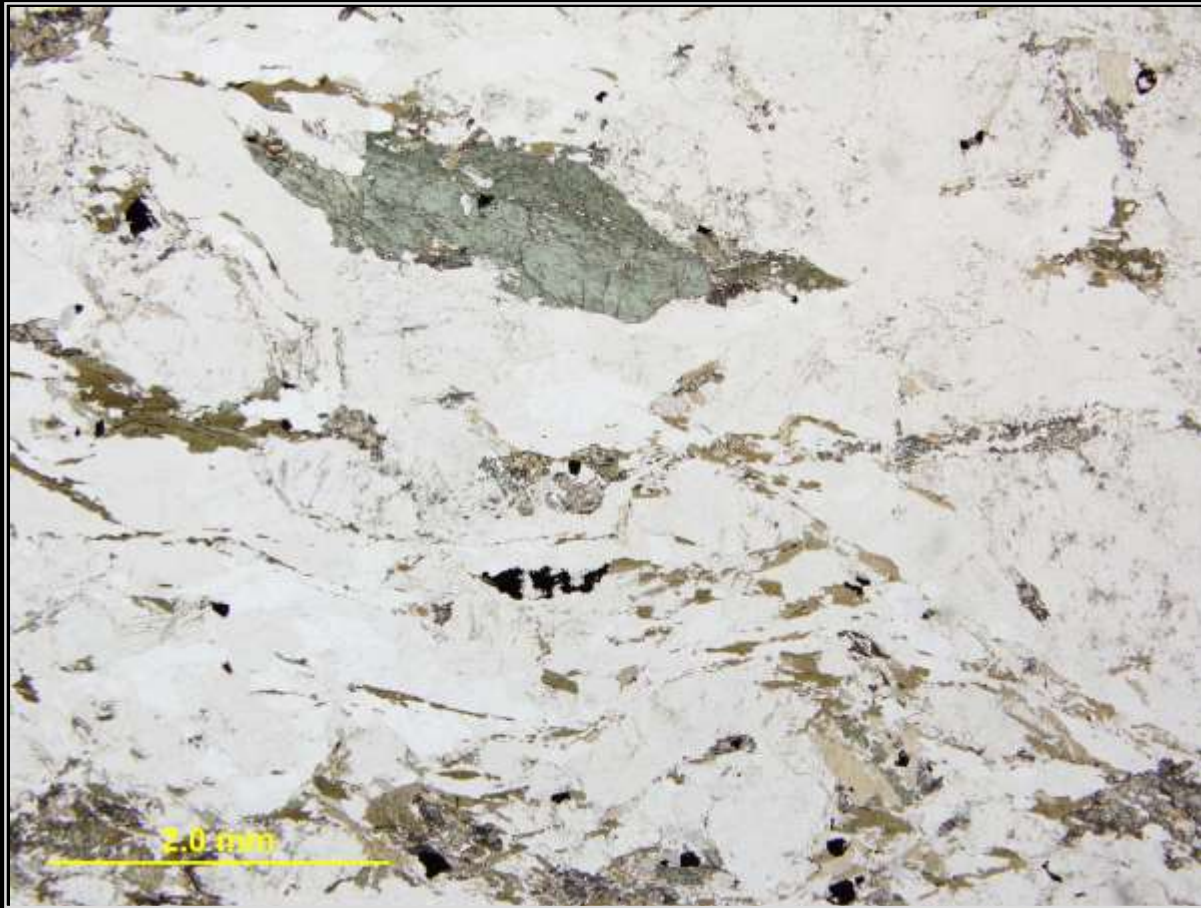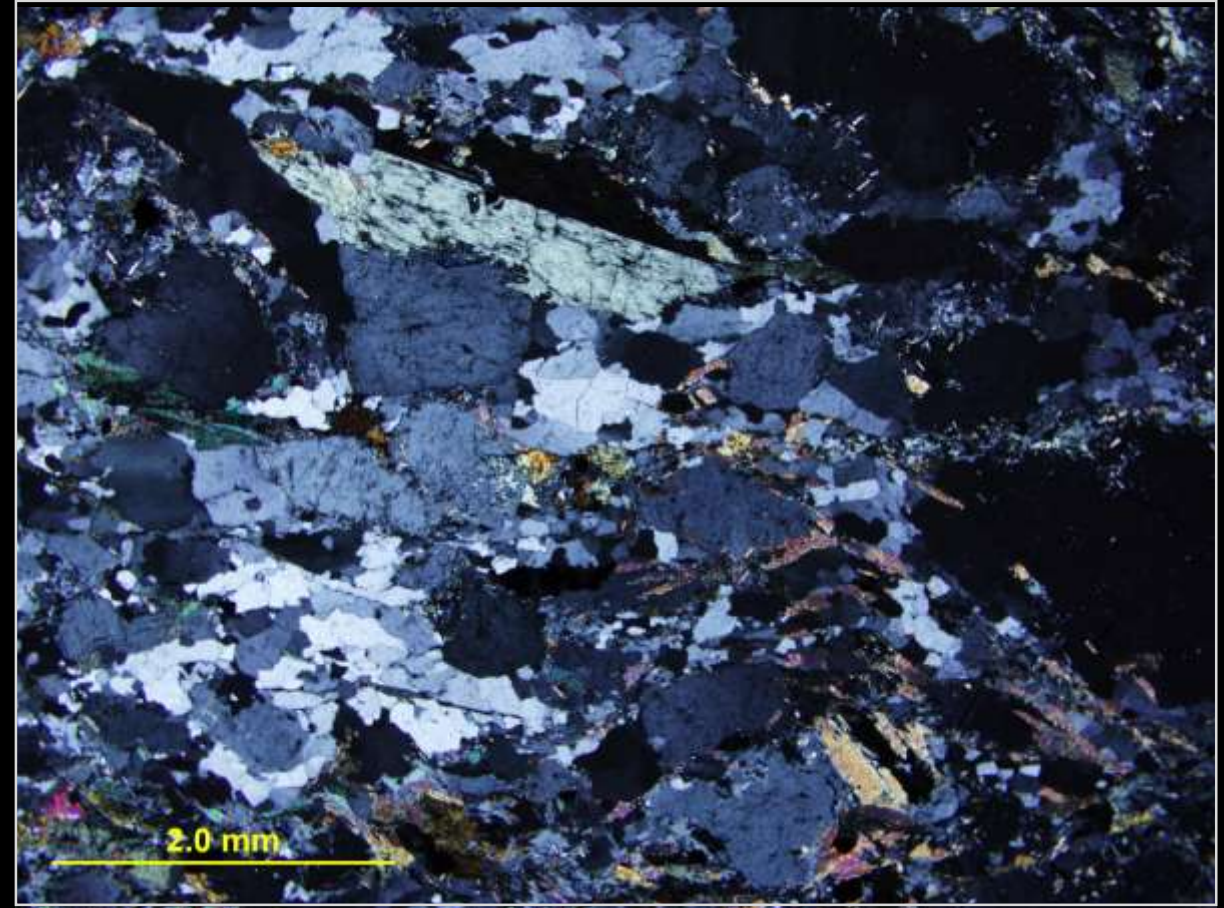

Plane transmitted and cross polarized light microphotographs

# Sample PMD-9-5

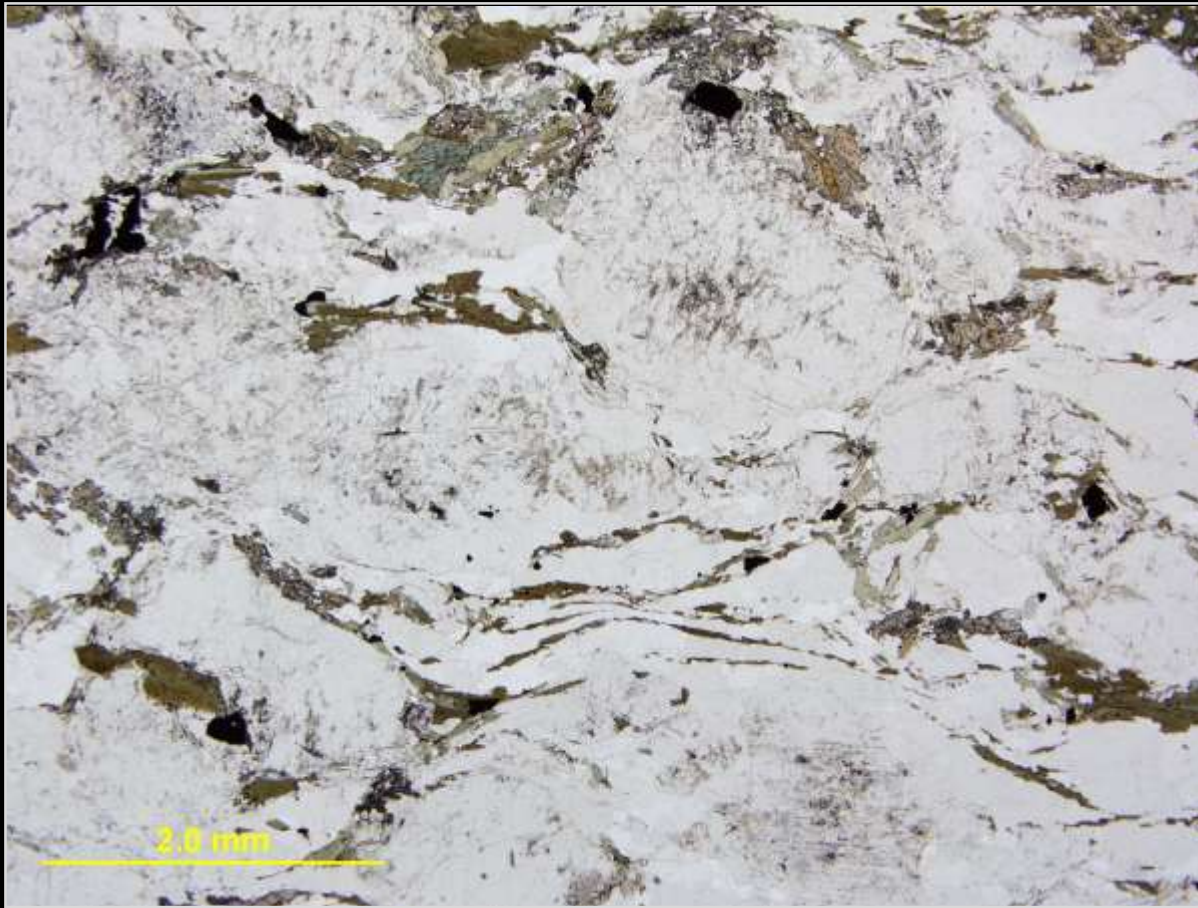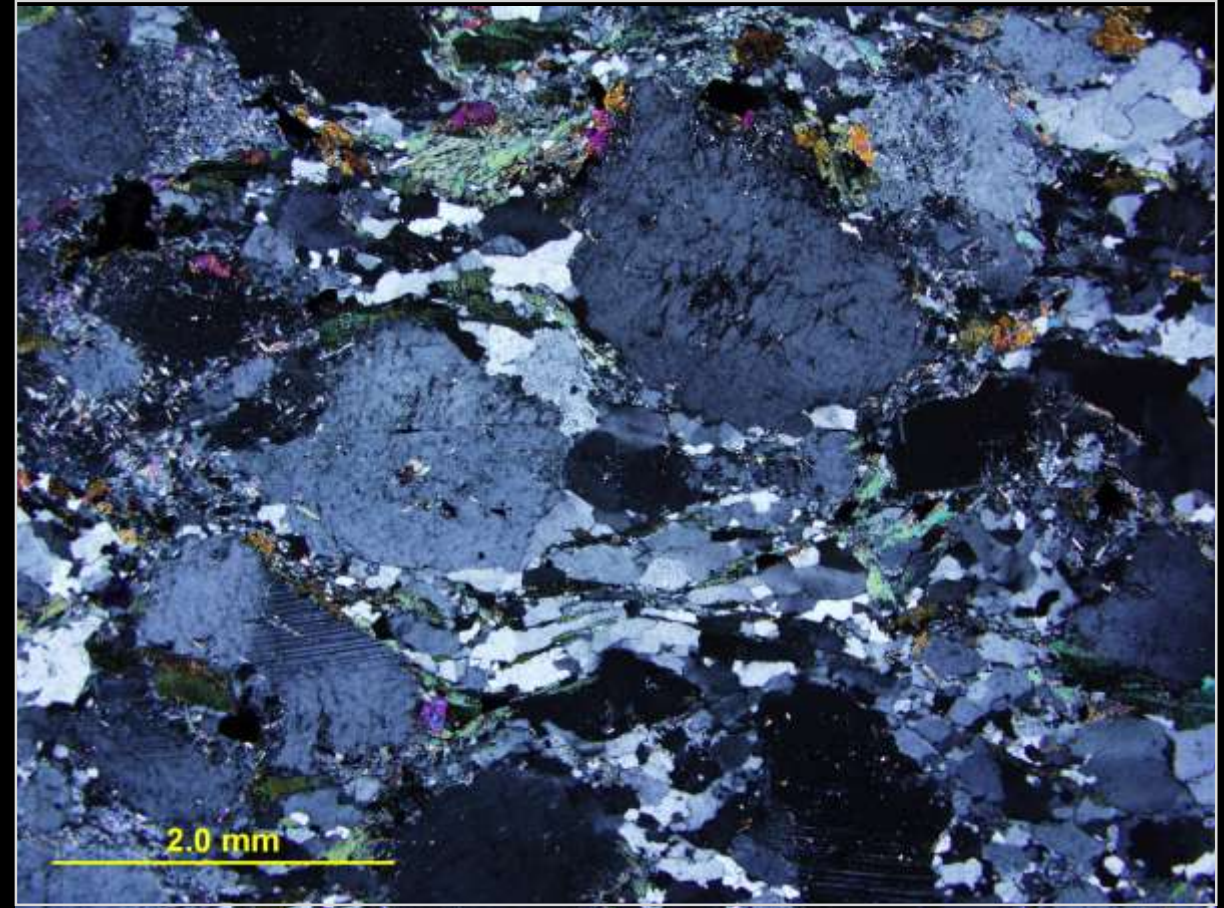

Plane transmitted and cross polarized light microphotographs
