# Supplementary material
Source: MDPI journal article supplement (https://www.mdpi.com/2075-163X/9/3/174)
Supplement: s1 [file s1]

Archive with 4 entries (4 files):
- Supplemental-material_S1-2.xlsx
- Supplemental-material_S5.pdf
- Supplemental-material_S6-8.xlsx
- Supplemental_material_S3-4.xlsx
