# Supplementary material
Source: MDPI journal article supplement (https://www.mdpi.com/2075-163X/9/3/174)
Supplement: s1 [file s1 › Supplemental-material_S1-2.xlsx]

## Sheet: S1
UTME83	UTMN83	Station_nb	Sample_nb	Sample_name	Outcrop_leucotonalite	Outcrop_tonalite	Outcrop_diorite	Outcrop_meladiorite	Outcrop_other	Thin section found	Pulpe available	SiO2 (wt%)	TiO2	Al2O3	CaO	K2O	Na2O	MgO	MnO	FeO	Fe2O3	Fe2O3T	P2O5	S (wt%)	CO2	H2O total	H2O_MOINS	H2O_PLUS	TOTAL	Rb (ppm)	Sr	Y	Nb	Zr	Zn	Cu	Ni	Cr	Ba	V	La	Ce	Nd	Sm	Eu	Gd	Tb	Ho	Tm
580966	5.53454e+06	3N-69D-1							only LDC
581752	5.53437e+06	3N-69D-10				unit
581689	5.53436e+06	3N-69D-11				unit
581562	5.53434e+06	3N-69D-12				unit
581295	5.53432e+06	3N-69D-13							only LDC
581224	5.53429e+06	3N-69D-14					unit
581464	5.53439e+06	3N-69D-15				unit
581115	5.53414e+06	3N-69D-16				unit
581074	5.53412e+06	3N-69D-17				unit	unit	unit	enclave LDC in pluton
581125	5.53389e+06	3N-69D-18					unit
581109	5.53379e+06	3N-69D-19
580994	5.53443e+06	3N-69D-2							only LDC
581093	5.53369e+06	3N-69D-20				unit	unit
581078	5.53347e+06	3N-69D-21			unit	unit	unit	unit
581105	5.53318e+06	3N-69D-22						unit	LDC and pluton
581062	5.53314e+06	3N-69D-23			unit
580796	5.53312e+06	3N-69D-24				unit
581862	5.53464e+06	3N-69D-3
581915	5.53462e+06	3N-69D-4							only LDC
581998	5.53459e+06	3N-69D-5						unit
581967	5.53446e+06	3N-69D-6
581992	5.53439e+06	3N-69D-7
581887	5.53439e+06	3N-69D-8				unit
581848	5.53436e+06	3N-69D-9				unit
528168	5.51705e+06	5A-15R-1					unit	unit
527989	5.51693e+06	5A-15R-10					unit
528057	5.51679e+06	5A-15R-11	5A-15R-8					unit
528049	5.51672e+06	5A-15R-12				unit		unit
528144	5.51647e+06	5A-15R-13				unit		enclave
528017	5.51639e+06	5A-15R-14				unit
527636	5.51638e+06	5A-15R-15				injection		unit
527575	5.51659e+06	5A-15R-16				injection		unit
527665	5.51671e+06	5A-15R-17				unit
527760	5.51677e+06	5A-15R-18				unit		unit
528244	5.51702e+06	5A-15R-2				injection		unit
528278	5.51689e+06	5A-15R-3				injection		unit
528306	5.51689e+06	5A-15R-4				injection		unit
528344	5.51686e+06	5A-15R-5						unit
528342	5.51678e+06	5A-15R-6	5A-15R-4	meladiorite				unit			yes	46.42	1.56	14.9	10.05	0.54	0.92	9.33	0.175	8.49	4.06		0.23	0.19	0.07	2.39			99.33	15	518	15	7	55	135	39	298	293	69	228	11.79	29.33	16.97	3.459	1.22	4.15	0.33	0.4	0.17
528575	5.51676e+06	5A-15R-7				injection		unit
528296	5.51668e+06	5A-15R-8				injection		unit
528076	5.51696e+06	5A-15R-9	5A-15R-7A			unit	unit
533497	5.51786e+06	5A-16R-1			injection				LDC and pluton
533246	5.51722e+06	5A-16R-10	5A-16R-4	meladiorite				unit			yes	46.8	1.14	17.36	11.59	0.36	2.67	7.45	0.145	5.71	3.92		0.51	0.32	0.05	1.29			99.32	5	633	16	10	65	89	41	117	164	137	217
533048	5.51721e+06	5A-16R-11						unit
532915	5.51713e+06	5A-16R-12				injection		unit
532913	5.51705e+06	5A-16R-13			injection			unit
532986	5.51695e+06	5A-16R-14						unit
533007	5.51707e+06	5A-16R-15				injection		unit
533050	5.51711e+06	5A-16R-16						unit
532953	5516836	5A-16R-17					injection	unit
533015	5.51684e+06	5A-16R-18						unit
532871	5.51652e+06	5A-16R-19					unit	unit
533407	5.51778e+06	5A-16R-2	5A-16R-1B	leucotonalite	injection			unit	LDC and pluton		yes	76.38	0.01	13.3	0.47	4.15	5.1	0.01	0.045	0.27	0.36				0.05	0.05			100.2	65	20	16	21	38	10	1	6	15	343
532901	5.51649e+06	5A-16R-20					unit	unit
533007	5.51658e+06	5A-16R-21						unit
532739	5.51689e+06	5A-16R-22						unit
532644	5.51681e+06	5A-16R-23					unit	unit
532649	5.51669e+06	5A-16R-24				unit		unit
532685	5.51654e+06	5A-16R-25						unit
533413	5.5177e+06	5A-16R-3	5A-16R-2C	leucotonalite	injection			injection	LDC and pluton	yes	yes	75.95	0.15	13.75	2.18	0.46	5.63	0.37	0.024	0.46	0.99			0.02	0.06	0.11			100.15	8	161	9	9	142	7	6	8	11	460	1	74.85	133.5	42.6	4.788	1.35	2.32	0.24	0.316	0.11
533413	5.5177e+06	5A-16R-3	5A-16R-2E		injection			injection	LDC and pluton
533489	5.5176e+06	5A-16R-4						unit	enclave LDC in pluton
533453	5.51759e+06	5A-16R-5			injection			injection	LDC and pluton
533487	5.51748e+06	5A-16R-6						unit	enclave LDC in pluton
533389	5.51746e+06	5A-16R-7			unit			unit
533270	5.51748e+06	5A-16R-8				injection		unit	enclave LDC in pluton
533203	5.51744e+06	5A-16R-9						injection	LDC and pluton
535224	5.51747e+06	5A-17D-1			injection			injection	LDC and pluton
535028	5.51742e+06	5A-17D-2			injection			injection	LDC and pluton
534724	5.51769e+06	5A-17D-3						injection	LDC and pluton
534868	5.51767e+06	5A-17D-4			injection				LDC and pluton
529048	5.51553e+06	5A-19D-10					unit	unit
527503	5.51534e+06	5A-19D-4			injection		unit	enclave
527500	5.51538e+06	5A-19D-5					unit	enclave
527409	5.51537e+06	5A-19D-6					unit	enclave
527347	5.51537e+06	5A-19D-7					unit	enclave
527742	5.51541e+06	5A-19D-8			unit	injection		unit
527986	5.51544e+06	5A-19D-9				injection	unit	unit
528382	5.51628e+06	5A-19R-1				unit
527766	5.51623e+06	5A-19R-10					unit
527608	5.51615e+06	5A-19R-11				unit
527309	5.51644e+06	5A-19R-12					unit
527180	5.51645e+06	5A-19R-13				unit
527058	5.51643e+06	5A-19R-14				injection	unit
528275	5.51621e+06	5A-19R-2						unit
528280	5.51589e+06	5A-19R-3					unit
528153	5.51592e+06	5A-19R-4					unit
527946	5.51591e+06	5A-19R-5				unit
528026	5.51617e+06	5A-19R-6	5A-19R-3B	meladiorite		injection		unit		yes
527994	5.51621e+06	5A-19R-7				unit
527890	5.51628e+06	5A-19R-8				unit
527818	5.51624e+06	5A-19R-9				unit
532153	5.51547e+06	5A-20D-1	5A-20D-1C	diorite	injection	injection	injection	unit		yes
532153	5.51547e+06	5A-20D-1	5A-20D-1D		injection	injection	injection	unit
532153	5.51547e+06	5A-20D-1	5A-20D-1E		injection	injection	injection	unit
532945	5.51566e+06	5A-20D-2	5A-20D-2C			injection	injection	unit
533545	5.51581e+06	5A-20D-3				injection		unit
533611	5.51578e+06	5A-20D-4					unit	unit
533758	5.51591e+06	5A-20D-5	5A-20D-3A				unit	enclave
533758	5.51591e+06	5A-20D-5	5A-20D-3C				unit	enclave
535914	5.51576e+06	5A-21D-4			injection		unit	enclave	enclave LDC in pluton
535765	5.51575e+06	5A-21D-5			injection			unit	enclave LDC in pluton
534699	5.51607e+06	5A-21D-6	5A-21D-4B	meladiorite	injection	injection	injection	unit			yes	46.86	2.07	17.5	9.15	0.41	3.59	4.92	0.28	8.56	4.11		1.25	0.07	0.1	0.83			99.7	7	465	40	22	131	124	42	10	18	91	121
534699	5.51607e+06	5A-21D-6	5A-21D-4D	meladiorite	injection	injection	injection	unit			yes	48.09	1.43	16.05	9.8	0.72	2.85	6.89	0.22	8.1	3.91		0.42	0.06	0.11	1.17			99.82	15	377	20	13	90	99	103	65	53	146	266	20.94	49.27	29.57	5.643	1.554	4.12	0.4	0.523	0.23
534699	5.51607e+06	5A-21D-6	5A-21D-4I	dyke	injection	injection	injection	unit		yes	yes	64.1	0.42	17.3	5.2	0.94	3.86	1.94	0.06	2.88	1.72		0.87	0.03	0.07		0.04	1.14		30	267	13	8	156	57	9	25	25	275	61	14.68	26.58	13.49	2.333	0.71		0.28	0.284
534699	5.51607e+06	5A-21D-6	5A-21D-4J	dyke	injection	injection	injection	unit		yes	yes	56.4	0.7	17.9	7.64	0.55	3.44	4.16	0.1	4.76	1.69		0.22	0.06	0.05		0.01	1.2		11	370	14	10	143	70	23	76	90	211	100
534699	5.51607e+06	5A-21D-6	5A-21D-4E	diorite	injection	injection	injection	unit			yes	60.69	0.63	17.48	6.74	0.44	3.85	4	0.092	3.92	2.01		0.15		0.07	0.23			99.3	8	234	16	9	159	65	18	30	48	153	93
534699	5.51607e+06	5A-21D-6	5A-21D-4K		injection	injection	injection	unit
534699	5.51607e+06	5A-21D-6	5A-21D-4L		injection	injection	injection	unit
535047	5.51644e+06	5A-27D-10							only LDC
534784	5.51656e+06	5A-27D-11							only LDC
534747	5.51651e+06	5A-27D-12						unit	LDC and pluton
534698	5.51646e+06	5A-27D-13				unit		unit	LDC and pluton
534650	5.51642e+06	5A-27D-14					unit	unit
534546	5.51644e+06	5A-27D-15					injection	unit
534578	5.51645e+06	5A-27D-16				injection		unit	enclave LDC in pluton
534484	5.51649e+06	5A-27D-17						injection	LDC and pluton
534403	5.51651e+06	5A-27D-18						injection	LDC and pluton
534227	5.51642e+06	5A-27D-19	5A-27D-5B	meladiorite		injection	injection	unit		yes	yes	52.74	0.7	17.88	9.37	0.88	2.51	6.71	0.14	5.44	1.65		0.12		0.06	1.11			99.31	19	263	14	8	87	86	13	118	164	165	155	9.607	20.96	11.95	2.415	0.828	3.06	0.24	0.296	0.2
534227	5.51642e+06	5A-27D-19	5A-27D-5A	meladiorite		injection	injection	unit			yes	54.15	0.5	17.88	9.23	0.88	2.7	6.61	0.12	4.51	1.18		0.37	0.62	0.12	0.71			99.58	21	302	12	7	77	65	9	102	130	192	111
534157	5.51642e+06	5A-27D-20				unit		unit
535597	5.51685e+06	5A-27D-3			injection			unit	enclave LDC in pluton
535427	5.51677e+06	5A-27D-4	5A-27D-3	dyke		injection		unit	enclave LDC in pluton	yes	yes	60	0.6	16.9	5.89	0.33	3.57	2.55	0.09	3.78	2.84		0.08	0.03	0.05		-0.01	2.3		7	259	13	5	103	54	9	30	41	160	99
535383	5.51679e+06	5A-27D-5						injection	LDC and pluton
535376	5.51674e+06	5A-27D-6						injection	LDC and pluton
534982	5.51676e+06	5A-27D-7						injection	LDC and pluton
534814	5.51662e+06	5A-27D-8	5A-27D-4	pegmatite	injection	injection		unit	LDC and pluton		yes	76.64	0.01	14.42	3.06	0.16	5.04	0.07	0.014	0.07	0.39		0.26	0.5	0.06	0.05			100.74	3	126	15	13	48	11	7	7	13	254
535309	5.51655e+06	5A-27D-9				injection		unit	LDC and pluton
531934	5.51744e+06	5A-32D-1				injection		unit
531213	5.51706e+06	5A-32D-2				injection	unit	enclave
531157	5.51716e+06	5A-32D-3				injection	unit	enclave
531132	5.51721e+06	5A-32D-4	5A-32D-2A	diorite		injection	unit			yes	yes	64.37	0.6	16.55	4.85	1.14	3.41	2.07	0.077	2.65	2.2		0.16	0.02	0.24	1.2			99.54	24	358	13	9	147	67	15	21	27	371	65
531685	5.51758e+06	5A-32D-6				injection	unit	injection
535423	5.51652e+06	5A-32R-1					injection	unit	enclave LDC in pluton
535064	5.51526e+06	5A-32R-10						unit
534951	5.51503e+06	5A-32R-11						unit
535594	5.51532e+06	5A-32R-12				unit
534391	5.51314e+06	5A-32R-13				unit	enclave	enclave	enclave LDC in pluton
534315	5.51314e+06	5A-32R-14				unit	enclave	enclave	enclave LDC in pluton
534387	5.51325e+06	5A-32R-15				unit
534548	5.51606e+06	5A-32R-2			injection	injection	injection	unit	enclave LDC in pluton
534237	5.516e+06	5A-32R-3	5A-32R-2C	meladiorite	injection	injection	unit	unit	enclave LDC in pluton	yes	yes	64.65	0.45	17.33	5.47	0.72	4.13	2.19	0.07	2.99	1.21		0.08		0.06	0.23			99.58	16	268	12	10	139	64	20	28	33	186	59
534071	5.51593e+06	5A-32R-4				unit
533995	5.5159e+06	5A-32R-5					unit		LDC and pluton
533959	5.51588e+06	5A-32R-6					unit	unit
535120	5.51565e+06	5A-32R-7						unit	enclave LDC in pluton
535087	5.51549e+06	5A-32R-8				injection		unit
534985	5.51543e+06	5A-32R-9				unit	unit	unit	enclave LDC in pluton
529740	5.51791e+06	5A-33D-20				injection	unit	enclave
527300	5.51755e+06	5A-33D-5				injection		unit
527198	5.51742e+06	5A-33D-6				injection	unit	unit
528359	5.5178e+06	5A-33D-7					unit	enclave
528316	5.51781e+06	5A-33D-8					unit
529352	5.51354e+06	5A-36D-1				injection	injection	unit
533736	5.51589e+06	5A-3R-1						unit
534220	5.51648e+06	5A-3R-10						unit	enclave LDC in pluton
533622	5.5158e+06	5A-3R-2					unit	unit
533414	5.51533e+06	5A-3R-3			injection			unit
533460	5.51512e+06	5A-3R-4				injection	unit	unit
533712	5.51512e+06	5A-3R-5						unit
533738	5.51521e+06	5A-3R-6				unit		unit
533851	5.51577e+06	5A-3R-7			injection		unit	enclave
534007	5.51592e+06	5A-3R-8							only LDC
534183	5.51623e+06	5A-3R-9			injection			unit
532902	5.51501e+06	5A-5D-1			injection			unit	enclave LDC in pluton
532977	5.51462e+06	5A-5D-10				injection		unit
532977	5.51459e+06	5A-5D-11				injection		unit
532983	5.51455e+06	5A-5D-12				injection		unit
532973	5.51434e+06	5A-5D-13					unit	injection
532516	5.51422e+06	5A-5D-14						unit
532254	5.51421e+06	5A-5D-15				unit	unit	unit
532518	5.51446e+06	5A-5D-16				injection	injection	unit
532508	5.51476e+06	5A-5D-17						unit
532537	5.51491e+06	5A-5D-18						unit
532480	5.51507e+06	5A-5D-19				unit	unit	injection
532885	5.51498e+06	5A-5D-2			injection			unit	enclave LDC in pluton
532888	5.51494e+06	5A-5D-3			injection			unit	enclave LDC in pluton
532888	5.51488e+06	5A-5D-4			injection		injection	unit	enclave LDC in pluton
532888	5.51484e+06	5A-5D-5			injection		injection	unit	enclave LDC in pluton
532888	5.51481e+06	5A-5D-6			injection		injection	unit	enclave LDC in pluton
532876	5.51477e+06	5A-5D-7					injection	unit
532856	5.51471e+06	5A-5D-8					injection	unit
532913	5.51466e+06	5A-5D-9						unit
534397	5.51309e+06	5A-70D-1	5A-70D-1	tonalite		unit	enclave	enclave	enclave LDC in pluton		yes	68.7	0.25	17.3	3.18	1.54	6.2	0.82	0.02	0.25	1.41		0.08	0.04	0.09		0.09	0.91		27	718	7	2	71	15	1	12	15	856	16
526287	5.51524e+06	5B-19D-1				injection	unit	enclave
526282	5.5153e+06	5B-19D-2				injection	injection	unit
526787	5.51529e+06	5B-19D-3					injection	unit
524451	5.51772e+06	5B-24R-1				injection	unit
524054	5.51654e+06	5B-24R-10						unit	volcanic
523983	5.51652e+06	5B-24R-11						injection	volcanic
524523	5.51751e+06	5B-24R-2						unit
524453	5.51754e+06	5B-24R-3						unit
524377	5.5176e+06	5B-24R-4						unit
524374	5.51751e+06	5B-24R-5					injection	unit
524409	5.51742e+06	5B-24R-6					unit	enclave
524146	5.5169e+06	5B-24R-7							volcanic
524074	5.51678e+06	5B-24R-8						unit
524066	5.51666e+06	5B-24R-9							volcanic
523794	5.51646e+06	5B-25R-1						unit
523389	5.51656e+06	5B-25R-2							volcanic
523322	5.51661e+06	5B-25R-3	5B-25R-3						volcanic
523262	5.51671e+06	5B-25R-4							volcanic
523334	5.51676e+06	5B-25R-5	5B-25R-5A						volcanic
523397	5.5168e+06	5B-25R-6	5B-25R-6B						volcanic
523027	5.51709e+06	5B-26R-13						injection	volcanic
523139	5.51719e+06	5B-26R-14							volcanic
523192	5.51723e+06	5B-26R-15							volcanic
523196	5.51727e+06	5B-26R-16						unit
523214	5.51735e+06	5B-26R-17						injection	volcanic
523069	5.51726e+06	5B-26R-18						unit
523557	5.51722e+06	5B-26R-19							volcanic
523904	5.51772e+06	5B-30D-12							volcanic
523989	5.51777e+06	5B-30D-13				unit		unit
524054	5.51769e+06	5B-30D-14					unit
524087	5.51777e+06	5B-30D-15					unit	unit
523832	5.51751e+06	5B-31D-1							volcanic
523671	5.5175e+06	5B-31D-2	5A-31D-2A	volcanic					volcanic	yes
523671	5.5175e+06	5B-31D-2	5B-31D-2A						volcanic
523671	5.5175e+06	5B-31D-2	5B-31D-2B						volcanic
523673	5.51725e+06	5B-31D-3	5B-31D-3	volcanic					volcanic	yes
523522	5.51717e+06	5B-31D-4	5B-31D-4C						volcanic
523518	5.51706e+06	5B-31D-5							volcanic
523350	5.51683e+06	5B-31D-6						injection	volcanic
523358	5.51687e+06	5B-31D-7	5B-31D-5B						volcanic
523332	5.51692e+06	5B-31D-8							volcanic
523305	5.51698e+06	5B-31D-9							volcanic
526602	5.51725e+06	5B-33D-1	5B-33D-1	meladiorite	injection		unit			yes
526790	5.51762e+06	5B-33D-2				unit	enclave
519480	5.51711e+06	5B-59D-1	5G-59D-1C	volcanic					volcanic	yes
526047	5.52123e+06	5G-??-1				unit
526122	5.52131e+06	5G-??-2				unit
526194	5.52192e+06	5G-??-3				unit
526298	5.51945e+06	5G-22R-1					unit
526975	5.52001e+06	5G-22R-10					unit
526959	5.51995e+06	5G-22R-11			unit
526936	5.51982e+06	5G-22R-12					unit
526931	5.51968e+06	5G-22R-13				unit
525984	5.51893e+06	5G-22R-15					injection	unit
526106	5.51882e+06	5G-22R-16			unit	injection	unit
525525	5.51964e+06	5G-22R-17						unit
526332	5.51952e+06	5G-22R-2					unit	injection
526479	5.51959e+06	5G-22R-3					unit	injection
526543	5.51961e+06	5G-22R-4					unit	injection
526590	5.51958e+06	5G-22R-5					unit
526631	5.51977e+06	5G-22R-6				unit
526660	5.51986e+06	5G-22R-7				unit
526722	5.51992e+06	5G-22R-8					unit
526776	5.52001e+06	5G-22R-9					unit
522664	5.51854e+06	5G-23R-1				injection		unit
524742	5518693	5G-23R-10					unit	injection
524819	5.5188e+06	5G-23R-11				unit
524838	5.51875e+06	5G-23R-12				unit
524761	5.51863e+06	5G-23R-13				unit		enclave
524979	5.51829e+06	5G-23R-14					unit
524670	5.51783e+06	5G-23R-15				unit	enclave	enclave
524513	5.51782e+06	5G-23R-16	5G-23R-14					unit
522657	5.51864e+06	5G-23R-2				injection		unit
522648	5.51868e+06	5G-23R-3				injection		unit
522543	5.51872e+06	5G-23R-4					unit	unit
522539	5.51878e+06	5G-23R-5				injection		unit
522740	5.51879e+06	5G-23R-6						unit
522787	5.51882e+06	5G-23R-7					unit	enclave
522783	5.51891e+06	5G-23R-8					unit	enclave
522345	5.51879e+06	5G-23R-9	5G-23R-8B			injection		unit
525922	5.52075e+06	5G-25D-1				unit	injection
526307	5.52077e+06	5G-25D-10	5G-25D-5			unit
526907	5.5204e+06	5G-25D-11	5G-25D-6A			unit	injection
526972	5.52046e+06	5G-25D-12				unit
526085	5.52081e+06	5G-25D-2	5G-25D-2	diorite		enclave	unit			yes
526108	5.5209e+06	5G-25D-3				unit
526131	5.52093e+06	5G-25D-4				unit
526153	5.52098e+06	5G-25D-5				unit
526227	5.52111e+06	5G-25D-6				unit
526207	5.52115e+06	5G-25D-7	5G-25D-3	leucotonalite	unit					yes
526244	5.5212e+06	5G-25D-8				unit		injection
526279	5521270	5G-25D-9				unit
523955	5.51795e+06	5G-25R-10			injection			unit
524032	5.51814e+06	5G-25R-11						unit
523995	5.51818e+06	5G-25R-12					unit
523984	5.51826e+06	5G-25R-13					unit
524055	5.51835e+06	5G-25R-14				injection	unit
524015	5.51785e+06	5G-25R-7						unit
524005	5.51788e+06	5G-25R-8						unit
523950	5.5179e+06	5G-25R-9						unit
524166	5.51806e+06	5G-26R-10				unit		unit
524148	5.51801e+06	5G-26R-11						unit
524088	5.51796e+06	5G-26R-12				unit		injection
524222	5.5183e+06	5G-26R-2				unit
524205	5.51827e+06	5G-26R-3						unit
524209	5.51823e+06	5G-26R-4					unit	unit
524110	5.51833e+06	5G-26R-5				unit
524117	5.51827e+06	5G-26R-6				unit
524145	5.51828e+06	5G-26R-7				unit
524138	5.51825e+06	5G-26R-8						unit
524105	5.51807e+06	5G-26R-9						unit
520214	5.52043e+06	5G-28R-1				injection		unit
521339	5.51984e+06	5G-28R-10						unit
521439	5.51936e+06	5G-28R-11						unit
521603	5.5191e+06	5G-28R-12				injection	unit	unit
520956	5.5204e+06	5G-28R-2						unit
520985	5.52002e+06	5G-28R-3				injection		unit
520985	5.51992e+06	5G-28R-4					unit	enclave
520809	5.51948e+06	5G-28R-5	5G-28R-5B	volcanic		injection	injection		volcanic	yes
520809	5.51948e+06	5G-28R-5	5G-28R-5A	dyke		injection	injection		volcanic	yes	yes	63.19	0.76	16.34	5.65	0.85	3.68	2.4	0.085	3.45	1.66		0.28		0.05	1.17			99.57	21	346	22	13	152				30	248	56
520809	5.51948e+06	5G-28R-5	5G-28R-5C			injection	injection		volcanic
520862	5.5194e+06	5G-28R-6						injection	volcanic
520921	5.51934e+06	5G-28R-7	5G-28R-7C	meladiorite		injection		injection	volcanic	yes
521064	5.51921e+06	5G-28R-8				injection		injection	volcanic
521411	5.51949e+06	5G-28R-9					unit
524711	5.51998e+06	5G-29D-1				injection		unit
525060	5.51953e+06	5G-29D-10				unit
525026	5.51949e+06	5G-29D-11				unit
525080	5.51943e+06	5G-29D-12				unit		injection
525105	5.51938e+06	5G-29D-13				unit		injection
525118	5.51932e+06	5G-29D-14				unit
525211	5.5193e+06	5G-29D-15					unit
525010	5.51917e+06	5G-29D-16				injection		unit
524971	5.5193e+06	5G-29D-17				injection		unit
524790	5.51945e+06	5G-29D-18				injection	unit
524819	5.51939e+06	5G-29D-19				unit
524789	5.52003e+06	5G-29D-2				unit		injection
524804	5.51934e+06	5G-29D-20				unit
524843	5.51929e+06	5G-29D-21				unit	unit
524957	5.51924e+06	5G-29D-22				unit		unit
524885	5.51924e+06	5G-29D-23				unit	unit
524919	5.51922e+06	5G-29D-24				unit		unit
524841	5.51922e+06	5G-29D-25				unit		enclave
524734	5.51904e+06	5G-29D-26				unit		injection
524604	5.51884e+06	5G-29D-27				unit		injection
524528	5.51878e+06	5G-29D-28				injection		unit
524476	5.51876e+06	5G-29D-29				injection	unit	unit
524870	5.51955e+06	5G-29D-3				unit		injection
524456	5.51885e+06	5G-29D-30						unit
524513	5.51893e+06	5G-29D-31				unit
524560	5.51903e+06	5G-29D-32				unit
524526	5.51906e+06	5G-29D-33	6F-29R-6B	dyke		unit				yes
524467	5.51896e+06	5G-29D-34				unit	unit
524430	5.51892e+06	5G-29D-35				unit	unit
524904	5.51967e+06	5G-29D-4	5G-29D-1			unit
525031	5.51977e+06	5G-29D-5				unit		injection
525073	5.51966e+06	5G-29D-6				unit
525163	5.51973e+06	5G-29D-7				unit
525187	5.51964e+06	5G-29D-8				unit		injection
525124	5.51955e+06	5G-29D-9				unit
524335	5.5188e+06	5G-30D-1					unit	unit
523920	5.51828e+06	5G-30D-10				injection		unit
523893	5.51823e+06	5G-30D-11				injection		unit
524239	5.51869e+06	5G-30D-2					unit
524240	5.51861e+06	5G-30D-3				injection		unit
524036	5.51851e+06	5G-30D-4					unit	unit
524223	5.51846e+06	5G-30D-5					injection	unit
524274	5.51851e+06	5G-30D-6					unit
524222	5.51852e+06	5G-30D-7					unit	unit
524160	5.51848e+06	5G-30D-8					unit
524016	5.5184e+06	5G-30D-9				injection		unit
526979	5.51792e+06	5G-33D-3				unit
526963	5.51796e+06	5G-33D-4					unit
519394	5.52246e+06	5G-34D-1				unit
519681	5.52192e+06	5G-34D-10				unit
519198	5.52167e+06	5G-34D-11				unit
519180	5.52161e+06	5G-34D-12						unit
519121	5.52157e+06	5G-34D-13				unit	enclave
519035	5.52144e+06	5G-34D-14							volcanic
519394	5.5225e+06	5G-34D-2
519444	5.52253e+06	5G-34D-3
519415	5.52258e+06	5G-34D-4
519156	5.52248e+06	5G-34D-5			unit
519280	5.52251e+06	5G-34D-6				injection
519056	5.52217e+06	5G-34D-7				unit
519155	5.5222e+06	5G-34D-8				unit
520091	5.52255e+06	5G-34D-9				unit		enclave
522117	5.51889e+06	5G-35D-1	5G-35D-1			injection	unit	injection
521949	5.5192e+06	5G-35D-10				injection		unit
521941	5.51897e+06	5G-35D-11						unit
521950	5.51892e+06	5G-35D-12				injection		unit
522163	5.519e+06	5G-35D-2	5G-35D-2B	dyke		injection	injection	unit		yes	yes	56.54	1.25	15.93	7.54	0.64	3.53	4.12	0.129	5.57	3.37		0.34	0.12	0.07	0.47			99.62	15	358	23	13	168	84	68	48	41	234	170	27.62	60.16	33.74	5.875	1.72	1.858	0.66	0.622
522062	5.51913e+06	5G-35D-3						unit
522171	5.51999e+06	5G-35D-4				injection		unit
522161	5.52005e+06	5G-35D-5				injection		unit
521899	5.51992e+06	5G-35D-6				injection		unit
521748	5.51923e+06	5G-35D-7						unit
521822	5.51922e+06	5G-35D-8				injection		unit
521791	5.51917e+06	5G-35D-9				injection		unit
520673	5.51947e+06	5G-57D-1	5G-57D-1A	volcanic		injection			volcanic	yes
520706	5.51943e+06	5G-57D-2							volcanic
520583	5.51922e+06	5G-57D-3							volcanic
520593	5.51912e+06	5G-57D-4	5G-57D-4	volcanic					volcanic	yes
520253	5.51888e+06	5G-57D-5							volcanic
520227	5.51839e+06	5G-57D-6							volcanic
520101	5.51812e+06	5G-57D-7	5G-57D-7B						volcanic
522761	5.51842e+06	5G-59D-2				injection		unit
522714	5.51839e+06	5G-59D-3				injection		unit
525773	5.523e+06	5G-67D-1							volcanic
525895	5.52245e+06	5G-67D-10				unit
525720	5.52304e+06	5G-67D-2	5G-67D-2B						volcanic
525720	5.5231e+06	5G-67D-3	5G-67D-3	granophyre					volcanic	yes
525773	5.52313e+06	5G-67D-4							volcanic
525874	5.52323e+06	5G-67D-5							volcanic
525985	5.52327e+06	5G-67D-6							volcanic
526075	5.52324e+06	5G-67D-7							volcanic
526086	5.52312e+06	5G-67D-8							volcanic
526070	5.52306e+06	5G-67D-9							volcanic
530718	5.51988e+06	5H-14R-1				unit
530760	5.51911e+06	5H-14R-10				unit
530725	5.51908e+06	5H-14R-11				unit		enclave
530713	5.51899e+06	5H-14R-12				unit		enclave
530594	5.519e+06	5H-14R-13				unit		enclave
530243	5.51906e+06	5H-14R-14					unit
530300	5.51897e+06	5H-14R-15					unit	enclave
530217	5.51896e+06	5H-14R-16					unit
530854	5.51959e+06	5H-14R-2				unit		enclave
530807	5.51951e+06	5H-14R-3			injection	unit		unit
530972	5.51951e+06	5H-14R-4						unit
531141	5.51939e+06	5H-14R-5				unit		enclave
531105	5.51931e+06	5H-14R-6						unit
530794	5.51932e+06	5H-14R-7				injection		unit
530796	5.51922e+06	5H-14R-8				injection		unit
530681	5.51924e+06	5H-14R-9				unit		unit
531840	5.52227e+06	5H-18D-1	5H-18D-1	granophyre				injection	LDC and pluton	yes	yes	77.22	0.16	12.29	1.19	1.28	5.01	0.13	0.022	0.6	1.42			0.01	0.7	0.16			100.19	25	132	32	15	173	8	13	5	8	137	1
532545	5.52149e+06	5H-18D-10							only LDC
532607	5.52149e+06	5H-18D-11							only LDC
532584	5.52151e+06	5H-18D-12						injection	LDC and pluton
532518	5.52142e+06	5H-18D-13						unit
532589	5.52146e+06	5H-18D-14						injection	LDC and pluton
532448	5.52162e+06	5H-18D-15						unit
532556	5.52181e+06	5H-18D-16						unit
532694	5.52183e+06	5H-18D-17						injection	LDC and pluton
532350	5.52072e+06	5H-18D-18	5H-18D-8B	meladiorite	injection			unit		yes	yes	48.26	1.41	15.65	8.95	0.33	2.33	7.03	0.155	8.56	2.11		0.32	0.1	1.4	3.01			99.62	5	493	21	9	87	95	38	131	176	121	221
531932	5.52232e+06	5H-18D-2	5H-18D-2A					injection	LDC and pluton
532168	5.52152e+06	5H-18D-3			injection			unit
532251	5.52157e+06	5H-18D-4						unit
532417	5.52158e+06	5H-18D-5						unit
532372	5.52149e+06	5H-18D-6	5H-18D-5B					unit
532388	5.52144e+06	5H-18D-7						injection	LDC and pluton
532435	5.52151e+06	5H-18D-8			injection			unit
532490	5.52151e+06	5H-18D-9						unit
535843	5.52058e+06	5H-18R-1						injection	LDC and pluton
535346	5.52001e+06	5H-18R-10						unit
535342	5.52018e+06	5H-18R-11						unit
535405	5.52024e+06	5H-18R-12						injection
535252	5.52017e+06	5H-18R-13
535198	5.52098e+06	5H-18R-14
535456	5.52103e+06	5H-18R-15			injection				LDC and pluton
535597	5.52103e+06	5H-18R-16							only LDC
535680	5.52107e+06	5H-18R-17							only LDC
535574	5.52128e+06	5H-18R-18							only LDC
535419	5.52135e+06	5H-18R-19							only LDC
535704	5.5206e+06	5H-18R-2							only LDC
535585	5.52186e+06	5H-18R-20	5H-18R-7B			injection			LDC and pluton
535656	5.52265e+06	5H-18R-21							only LDC
535603	5.52061e+06	5H-18R-3							only LDC
535558	5.5207e+06	5H-18R-4							only LDC
535508	5.52071e+06	5H-18R-5							only LDC
535457	5.52066e+06	5H-18R-6							only LDC
535584	5.52048e+06	5H-18R-7			injection				LDC and pluton
535560	5.5204e+06	5H-18R-8							only LDC
535767	5.52031e+06	5H-18R-9							only LDC
527318	5.51831e+06	5H-19R-15					unit
528719	5.51812e+06	5H-19R-16				unit
528779	5.51824e+06	5H-19R-17	5H-19R-14C	dyke		unit		enclave		yes	yes	56.3	0.45	14.2	7.13	0.77	3.47	6.87	0.16	4.56	2.21		0.18	0.1	0.38		-0.01	2.28		23	331	12	7	91	154	94	124	404	370	106
528968	5.51824e+06	5H-19R-18				unit		enclave
529213	5.5183e+06	5H-19R-19				unit		enclave
529070	5.51851e+06	5H-19R-20				unit		enclave
528997	5.5186e+06	5H-19R-21				unit
529014	5.51901e+06	5H-19R-22					unit
529135	5.51895e+06	5H-19R-23	5H-19R-18A	diorite		unit	unit	enclave		yes
529135	5.51895e+06	5H-19R-23	5H-19R-18B			unit	unit	enclave
529195	5.51895e+06	5H-19R-24					unit
527611	5.52234e+06	5H-20R-10				injection			LDC and pluton
527688	5.52243e+06	5H-20R-11							only LDC
527638	5.52248e+06	5H-20R-12				injection			LDC and pluton
527836	5.52259e+06	5H-20R-13				injection			LDC and pluton
526958	5.52224e+06	5H-20R-4			unit
527104	5.5222e+06	5H-20R-5			unit			injection
527246	5.52229e+06	5H-20R-6				injection			LDC and pluton
527310	5.52232e+06	5H-20R-7	5H-20R-4C			injection			LDC and pluton
527321	5.52222e+06	5H-20R-8			unit
527464	5.52224e+06	5H-20R-9			unit			injection
527861	5.52267e+06	5H-21R-1				injection			LDC and pluton
528419	5.52271e+06	5H-21R-10			unit			injection	LDC and pluton
528447	5.52283e+06	5H-21R-11			unit				LDC and pluton
528540	5.52287e+06	5H-21R-12			unit			injection	LDC and pluton
528621	5.5229e+06	5H-21R-13			unit				LDC and pluton
528686	5.52353e+06	5H-21R-14			unit				LDC and pluton
528861	5.52354e+06	5H-21R-15			unit			injection	LDC and pluton
529151	5.52367e+06	5H-21R-16						injection	volcanic
529216	5.52368e+06	5H-21R-17							volcanic
529266	5.52373e+06	5H-21R-18							volcanic
529441	5.52389e+06	5H-21R-19							volcanic
527964	5.52276e+06	5H-21R-2				injection			LDC and pluton
529453	5.52399e+06	5H-21R-20						injection	volcanic
529498	5.52414e+06	5H-21R-21							volcanic
527905	5.52288e+06	5H-21R-3				injection			LDC and pluton
528046	5.52254e+06	5H-21R-4				injection			LDC and pluton
527981	5.5224e+06	5H-21R-5				injection			LDC and pluton
528116	5.52243e+06	5H-21R-6	5H-21R-5A	granophyre grabbroique				injection	LDC and pluton	yes	yes	77.37	0.24	11.97	0.53	1.73	2.69	1.92	0.038	1.86	0.92				0.15	1.08			100.5	29	87	79	23	306				12	415	6
528175	5.52244e+06	5H-21R-7				injection		injection	LDC and pluton
528221	5.52277e+06	5H-21R-8	5H-21R-7	granophyre	unit				LDC and pluton	yes
528324	5.52271e+06	5H-21R-9			unit			injection	LDC and pluton
535919	5.51971e+06	5H-22D-23						injection	LDC and pluton
535893	5.51963e+06	5H-22D-24				injection	injection	injection	LDC and pluton
527244	5.52018e+06	5H-22R-14				unit
535863	5.51916e+06	5H-23D-1			injection			injection	LDC and pluton
535573	5.52213e+06	5H-23D-12			injection		injection		LDC and pluton
535531	5.52188e+06	5H-23D-13					injection		LDC and pluton
535638	5.51881e+06	5H-23D-2							only LDC
535570	5.51843e+06	5H-23D-3			injection				LDC and pluton
532294	5.52064e+06	5H-24D-1	5H-24D-1C		injection			unit
531158	5.5204e+06	5H-24D-10					unit
531209	5.52043e+06	5H-24D-11					unit
531166	5.52061e+06	5H-24D-12					unit
531222	5.5206e+06	5H-24D-13					unit
531158	5.52066e+06	5H-24D-14							only LDC
532180	5.51997e+06	5H-24D-2						unit
531568	5.52007e+06	5H-24D-3					unit
531523	5.52015e+06	5H-24D-4	5H-24D-3		injection		unit
531555	5.52013e+06	5H-24D-5				injection		unit
531462	5.52008e+06	5H-24D-6					unit	injection
531336	5.52019e+06	5H-24D-7				unit		unit
531181	5.52019e+06	5H-24D-8					unit	injection
531131	5.52036e+06	5H-24D-9					unit
527071	5.52055e+06	5H-25D-13				unit	injection
527080	5.52058e+06	5H-25D-14				unit
527115	5.5206e+06	5H-25D-15	5H-25D-8B	meladiorite		unit				yes
527159	5.52062e+06	5H-25D-16	5H-25D-9	leucotonalite	unit	unit				yes	yes	75.29	0.16	13.7	1.58	1.87	5.09	0.25	0.024	0.33	0.99		0.01		1.03	0.2			100.52	50	140	11	12	91	10	5	8	17	468	9
527181	5.52062e+06	5H-25D-17			unit	unit
527381	5.52058e+06	5H-25D-18				unit
527293	5.52065e+06	5H-25D-19	5H-25D-11	tonalite		unit				yes
527199	5.52079e+06	5H-25D-20				unit		injection
527269	5.52085e+06	5H-25D-21				unit		injection
527315	5.52089e+06	5H-25D-22				unit
527347	5.52096e+06	5H-25D-23	5H-25D-14A			unit	unit
527429	5.52099e+06	5H-25D-24				unit
527470	5.52102e+06	5H-25D-25				unit
527469	5.52105e+06	5H-25D-26				unit
527483	5.52109e+06	5H-25D-27				unit		injection
527514	5.52114e+06	5H-26D-1	5H-26D-1	tonalite		unit				yes
527702	5.52132e+06	5H-26D-10				unit	injection
527814	5.52116e+06	5H-26D-11	5H-26D-8				unit
527916	5.52123e+06	5H-26D-12			unit
527862	5.52109e+06	5H-26D-13			unit
527917	5.52104e+06	5H-26D-14				unit
527882	5.52103e+06	5H-26D-15				unit
527866	5.521e+06	5H-26D-16				unit
527875	5.52095e+06	5H-26D-17				unit
527862	5.5209e+06	5H-26D-18				unit
527846	5.52086e+06	5H-26D-19			injection	unit		enclave
527536	5.52119e+06	5H-26D-2				unit		enclave
527834	5.52081e+06	5H-26D-20				unit	unit
527823	5.52075e+06	5H-26D-21				unit
527831	5.5207e+06	5H-26D-22				unit
527948	5.52075e+06	5H-26D-23	5H-26D-11	tonalite	unit	unit				yes	yes	69.74	0.32	14.81	2.94	1.01	4.37	1.12	0.038	1.92	0.65		0.29	0.54	1.77	1			100.52	26	259	10	8	125	44	3	15	21	359	29	19.09	33.63	11.92	1.773	0.55	1.31	0.19	0.159	0.11
528059	5.52078e+06	5H-26D-24				unit
528103	5.52076e+06	5H-26D-25				unit
528149	5.52075e+06	5H-26D-26				unit
528172	5.52077e+06	5H-26D-27				unit
528291	5.52074e+06	5H-26D-28					unit
528294	5.52127e+06	5H-26D-29			injection	unit		enclave
527569	5.52121e+06	5H-26D-3				unit		enclave
528300	5.52131e+06	5H-26D-30				unit
528273	5.52132e+06	5H-26D-31				unit
528219	5.52139e+06	5H-26D-32	5H-26D-13A	meladiorite		unit	unit	enclave		yes
528281	5.52141e+06	5H-26D-33				unit	enclave
527603	5.52117e+06	5H-26D-4				unit
527630	5.52113e+06	5H-26D-5			unit			injection
527637	5.52121e+06	5H-26D-6	5H-26D-6	tonalite		unit				yes	yes	73.48	0.19	14.37	2.27	1.52	4.55	0.64	0.037	1	0.96		0.02		0.54	0.36			99.94	39	263	11	13	130	22	2	9	13	661	11	23.37	41.85	13.64	1.997	0.66	2.26	0.19	0.262	0.08
527625	5.52126e+06	5H-26D-7				unit
527441	5.52139e+06	5H-26D-8				unit
527679	5.52124e+06	5H-26D-9				unit
528550	5.52107e+06	5H-26R-1			unit
531173	5.51996e+06	5H-27R-1				injection		unit
531205	5.51839e+06	5H-27R-10				unit		enclave
531288	5.51855e+06	5H-27R-11				unit		unit
531841	5.51848e+06	5H-27R-12						unit
531904	5.51846e+06	5H-27R-13						unit
531910	5.51855e+06	5H-27R-14				injection		unit
532496	5.51841e+06	5H-27R-15				injection		unit
532459	5.5184e+06	5H-27R-16						unit
532399	5.51832e+06	5H-27R-17	5H-27R-10C		injection			unit
532414	5.51836e+06	5H-27R-18						unit
532340	5.51827e+06	5H-27R-19						unit
531304	5.52011e+06	5H-27R-2						unit
532299	5.51819e+06	5H-27R-20						unit
531845	5.51996e+06	5H-27R-3				injection		unit
531849	5.51992e+06	5H-27R-4				unit		enclave
531778	5.5198e+06	5H-27R-5	5H-27R-4	diorite			unit	unit		yes	yes	57	0.65	17.25	7.48	0.65	3.03	4.1	0.122	4.91	1.89		0.08	0.01	0.44	1.7			99.31	16	244	16	9	80				54	224	124	12.36	26.3	13.08	2.698	0.74	4.48	0.17	0.362	0.23
531835	5.51972e+06	5H-27R-6						unit
531213	5.51897e+06	5H-27R-7				unit
531201	5.51891e+06	5H-27R-8				unit		unit
530953	5.51849e+06	5H-27R-9				unit		enclave
528585	5.52196e+06	5H-28D-1	5H-28D-1	tonalite		unit				yes
528899	5.52294e+06	5H-28D-10			unit			injection	LDC and pluton
528923	5.52298e+06	5H-28D-11			unit			injection	LDC and pluton
529056	5.52306e+06	5H-28D-12			unit			injection	LDC and pluton
529226	5.52314e+06	5H-28D-13			unit				LDC and pluton
529331	5.52319e+06	5H-28D-14			unit			injection	LDC and pluton
529460	5.52337e+06	5H-28D-15			unit				LDC and pluton
529436	5.52353e+06	5H-28D-16	5H-28D-9		unit			injection
529539	5.52354e+06	5H-28D-17							volcanic
529675	5.52369e+06	5H-28D-19	5H-28D-11	volcanic					volcanic	yes
528388	5.52207e+06	5H-28D-2			unit
529670	5.52379e+06	5H-28D-20						injection	volcanic
528281	5.52208e+06	5H-28D-3			unit
528255	5.52212e+06	5H-28D-4				injection			LDC and pluton
528142	5.52218e+06	5H-28D-5	5H-28D-4B	gabbro		injection		injection	LDC and pluton	yes
528076	5.5221e+06	5H-28D-6	5H-28D-5B	gabbro		injection			LDC and pluton	yes	yes	66.49	0.21	7.4	0.41			6.96	0.122	10.22	3.91				0.16	4.71			100.59	1		68	19	420	106	7	23	24	12	285
528920	5.52281e+06	5H-28D-7	5H-28D-6A	granophyre	unit			injection	LDC and pluton	yes	yes	77.06	0.18	12.98	1	1.71	5.11	0.2	0.025	0.33	1.31			0.29	0.5	0.05			100.75	29	96	41	20	201	7	5	7	9	693	10
528965	5.52288e+06	5H-28D-8			unit			injection	LDC and pluton
528941	5.52292e+06	5H-28D-9			unit			injection	LDC and pluton
531786	5.51851e+06	5H-32D-10			injection			unit
531787	5.51857e+06	5H-32D-11						unit
531834	5.51872e+06	5H-32D-12						unit
531809	5.51874e+06	5H-32D-13			injection			unit
531696	5.51892e+06	5H-32D-14						unit
531666	5.51905e+06	5H-32D-15			injection			unit
531598	5.51905e+06	5H-32D-16						unit
531582	5.51912e+06	5H-32D-17						unit
531548	5.51921e+06	5H-32D-18				injection		unit
531451	5.51923e+06	5H-32D-19						unit
531385	5.5194e+06	5H-32D-20				injection		unit
531578	5.51951e+06	5H-32D-21	5H-32D-8B	diorite		unit		unit		yes
531578	5.51951e+06	5H-32D-21	5H-32D-8A	diorite		injection	unit	unit		yes
531622	5.51952e+06	5H-32D-22	5H-32D-9	tonalite		unit		unit		yes	yes	74.49	0.32	13.53	2.27	1.27	4.65	0.55	0.04	1.19	1.41		0.01		0.16	0.3			100.19	16	236	13	17	220	15	1	6	12	503	3
531672	5.51799e+06	5H-32D-5			injection			unit
531976	5.51805e+06	5H-32D-6	5H-32D-4					unit
532034	5.51816e+06	5H-32D-7			injection			unit
531977	5.51828e+06	5H-32D-8			injection			unit
531799	5.51845e+06	5H-32D-9						unit
528422	5.51821e+06	5H-33D-10				injection		unit
528430	5.51825e+06	5H-33D-11				injection		unit
528468	5.51828e+06	5H-33D-12				injection		unit
528342	5.5184e+06	5H-33D-13				unit	enclave	enclave
528582	5.51858e+06	5H-33D-14	5H-33D-5	tonalite		unit				yes
528656	5.51863e+06	5H-33D-15				unit		enclave
527754	5.5186e+06	5H-33D-16				unit
529041	5.51914e+06	5H-33D-17	5H-33D-7	tonalite		unit				yes
529120	5.51928e+06	5H-33D-18				injection		unit
529968	5.51874e+06	5H-33D-19				injection		unit
528517	5.5182e+06	5H-33D-9	5H-33D-4D	tonalite		unit	enclave	enclave			yes	68.68	0.96	14.73	3.88	0.65	4.71	1.37	0.081	2.39	2.12		0.15		0.04	0.18			99.94	13	336	26	15	353	60	7	7	19	407	31
533604	5.52298e+06	5H-62D-1	5H-62D-1	granophyre					only LDC	yes
533636	5.52284e+06	5H-62D-2							only LDC
559056	5.51763e+06	5H-68D-1	6B-68D-1	leucotonalite	unit					yes
554450	5.51138e+06	6B-11D-1			injection				LDC and pluton
554423	5.51134e+06	6B-11D-2					injection		LDC and pluton
554385	5.51124e+06	6B-11D-3	6B-11D-1				injection		LDC and pluton
555154	5.51776e+06	6B-13R-5
559173	5.51301e+06	6B-50D-1			injection				LDC and pluton
559143	5.51309e+06	6B-50D-2							only LDC
559024	5.51312e+06	6B-50D-3	6B-50D-1A			injection	injection		LDC and pluton
559024	5.51312e+06	6B-50D-3	6B-50D-1B			injection	injection		LDC and pluton
559024	5.51312e+06	6B-50D-3	6B-50D-1C			injection	injection		LDC and pluton
558755	5.51326e+06	6B-50D-4				injection	injection		LDC and pluton
558281	5.51297e+06	6B-50D-5				injection	injection		LDC and pluton
558153	5.513e+06	6B-51D-1				injection	injection		LDC and pluton
558005	5.5123e+06	6B-51D-10			injection				LDC and pluton
558092	5.51232e+06	6B-51D-11				injection		injection	LDC and pluton
558072	5.51225e+06	6B-51D-12				injection		injection	LDC and pluton
558098	5.51226e+06	6B-51D-13				injection		injection	LDC and pluton
558123	5.51226e+06	6B-51D-14				injection		injection	LDC and pluton
558027	5.51221e+06	6B-51D-15					injection	injection	LDC and pluton
558167	5.51194e+06	6B-51D-16							only LDC
558002	5.51203e+06	6B-51D-17							only LDC
558082	5.51217e+06	6B-51D-18					injection	injection	LDC and pluton
558104	5.51219e+06	6B-51D-19					injection	injection	LDC and pluton
558058	5.51293e+06	6B-51D-2	6B-51D-1			injection	injection		LDC and pluton
558091	5.5129e+06	6B-51D-3				injection	injection	injection	LDC and pluton
558062	5.51288e+06	6B-51D-4	6B-51D-2			injection	injection		LDC and pluton
558080	5.51285e+06	6B-51D-5	6B-51D-3A			injection	injection		LDC and pluton
558080	5.51285e+06	6B-51D-5	6B-51D-3B			injection	injection		LDC and pluton
558078	5.51283e+06	6B-51D-6				injection	injection		LDC and pluton
557994	5.51281e+06	6B-51D-7				injection	injection		LDC and pluton
558036	5.51262e+06	6B-51D-8							only LDC
558081	5.51253e+06	6B-51D-9			injection				LDC and pluton
558154	5.51312e+06	6B-52D-1	6B-52D-1A			injection	injection		LDC and pluton
558154	5.51312e+06	6B-52D-1	6B-52D-1B			injection	injection		LDC and pluton
558964	5.51353e+06	6B-52D-10					injection		LDC and pluton
558939	5.51348e+06	6B-52D-11					injection		LDC and pluton
558902	5.51343e+06	6B-52D-12					injection		LDC and pluton
558840	5.51343e+06	6B-52D-13							only LDC
558500	5.51349e+06	6B-52D-14							only LDC
558537	5.51357e+06	6B-52D-15					injection		LDC and pluton
558608	5.51364e+06	6B-52D-16					injection		LDC and pluton
558685	5.51366e+06	6B-52D-17					injection		LDC and pluton
558740	5.51362e+06	6B-52D-18					injection		LDC and pluton
558888	5.51369e+06	6B-52D-19					injection		LDC and pluton
558134	5.51311e+06	6B-52D-2				injection	injection		LDC and pluton
558947	5.51362e+06	6B-52D-20				injection	injection		LDC and pluton
558113	5.5131e+06	6B-52D-3				injection	injection		LDC and pluton
558085	5.51308e+06	6B-52D-4			injection	injection	injection		LDC and pluton
558063	5.51309e+06	6B-52D-5	6B-52D-2	dyke	injection	injection	injection		LDC and pluton	yes	yes	46.9	1.07	17.7	7.75	0.03	0.62	7.42	0.16	8.95	2.74		0.25	0.07	0.15		0.03	5.4		1	215	17	11	88	94	29	73	77	32	194
558038	5.51304e+06	6B-52D-6			injection	injection	injection		LDC and pluton
557968	5.51299e+06	6B-52D-7							only LDC
557951	5.51297e+06	6B-52D-8							only LDC
558866	5.51366e+06	6B-52D-9	6B-52D-4	dyke		injection			LDC and pluton	yes	yes	62	0.4	16.7	5.31	0.07	4.22	2.71	0.05			4.73	0.11	0.51	0.58		-0.01	2.16		22	197	16	9	102	39	41	37	41	325	58
558793	5.51305e+06	6B-53D-1						injection	LDC and pluton
558902	5.51279e+06	6B-53D-10				injection	injection		LDC and pluton
558869	5.5128e+06	6B-53D-11				injection	injection		LDC and pluton
558842	5.51278e+06	6B-53D-12				injection	injection		LDC and pluton
558829	5.51272e+06	6B-53D-13				injection		injection	LDC and pluton
558794	5.51272e+06	6B-53D-14				injection		injection	LDC and pluton
558807	5.51269e+06	6B-53D-15	6B-53D-5			injection		injection	LDC and pluton
558936	5.51263e+06	6B-53D-16				injection	injection		LDC and pluton
558805	5.51259e+06	6B-53D-17							only LDC
558687	5.51262e+06	6B-53D-18							only LDC
558657	5.51264e+06	6B-53D-19							only LDC
558868	5.51297e+06	6B-53D-2	6B-53D-1			injection	injection		LDC and pluton
558951	5.51238e+06	6B-53D-20						unit
558866	5.51231e+06	6B-53D-21							only LDC
558813	5.51227e+06	6B-53D-22			injection				LDC and pluton
558866	5.51222e+06	6B-53D-23	6B-53D-6				injection	injection	LDC and pluton
558724	5.51206e+06	6B-53D-24						unit
558671	5.5121e+06	6B-53D-25							only LDC
558429	5.51185e+06	6B-53D-26						unit
558490	5.51178e+06	6B-53D-27							only LDC
558480	5.51182e+06	6B-53D-28							only LDC
558547	5.51178e+06	6B-53D-29							only LDC
558985	5.51297e+06	6B-53D-3	6B-53D-2			injection	injection		LDC and pluton
558598	5.51174e+06	6B-53D-30							only LDC
558600	5.51171e+06	6B-53D-31							only LDC
558595	5.51168e+06	6B-53D-32							only LDC
559048	5.51168e+06	6B-53D-33							only LDC
558157	5.51304e+06	6B-53D-34				injection	injection		LDC and pluton
559000	5.513e+06	6B-53D-4				injection	injection		LDC and pluton
558828	5.51296e+06	6B-53D-5	6B-53D-3	dyke		injection	injection		LDC and pluton	yes	yes	51.1	0.75	17.1	8.59	0.02	0.59	7.12	0.1			9.9	0.26	0.82	0.09		0.03	4.32			254	16	9	84	73	104	92	125	45	171
558877	5.51294e+06	6B-53D-6	6B-53D-4			injection	injection		LDC and pluton
558846	5.51294e+06	6B-53D-7				injection	injection		LDC and pluton
558863	5.51283e+06	6B-53D-8				injection	injection		LDC and pluton
558883	5.51281e+06	6B-53D-9				injection	injection		LDC and pluton
558130	5.51635e+06	6B-54D-1			injection	unit
558223	5.51633e+06	6B-54D-2				unit	enclave
558284	5.51628e+06	6B-54D-3			injection	unit	enclave
558302	5.51633e+06	6B-54D-4				unit	enclave
558278	5.51622e+06	6B-54D-5			injection	unit	enclave
558374	5.51623e+06	6B-54D-6	6B-54D-4A			unit			LDC and pluton
558355	5.51615e+06	6B-54D-7	6B-54D-5A			unit			LDC and pluton
562441	5.51597e+06	6B-55D-1	6B-55D-1				unit
562712	5.51685e+06	6B-55D-10			injection	unit	injection		LDC and pluton
562767	5.51692e+06	6B-55D-11			injection	unit			LDC and pluton
562752	5.51698e+06	6B-55D-12			injection	unit			LDC and pluton
562477	5.51605e+06	6B-55D-2			injection			injection	LDC and pluton
562530	5.51673e+06	6B-55D-3			injection	unit	injection		LDC and pluton
562491	5.51673e+06	6B-55D-4			injection	unit	injection		LDC and pluton
562553	5.51678e+06	6B-55D-5			injection	unit	injection		LDC and pluton
562563	5.51682e+06	6B-55D-6			injection	unit	injection		LDC and pluton
562595	5.51684e+06	6B-55D-7			injection	unit	injection		LDC and pluton
562635	5.51686e+06	6B-55D-8			injection	unit	injection		LDC and pluton
562676	5.51694e+06	6B-55D-9			injection	unit			LDC and pluton
561632	5.51565e+06	6B-56D-1			injection	injection			LDC and pluton
561588	5.5157e+06	6B-56D-2			injection	injection			LDC and pluton
561454	5.5157e+06	6B-56D-3			injection	injection			LDC and pluton
562089	5.51513e+06	6B-56D-4					injection		LDC and pluton
561895	5.51496e+06	6B-56D-5	6B-56D-2				injection		LDC and pluton
561541	5.51413e+06	6B-56D-6					injection		LDC and pluton
562137	5.5144e+06	6B-56D-7							only LDC
562192	5.51447e+06	6B-56D-8							only LDC
562465	5.51468e+06	6B-56D-9							only LDC
555322	5.51173e+06	6B-58D-1			unit				LDC and pluton
555256	5.51167e+06	6B-58D-2			injection				LDC and pluton
555235	5.51163e+06	6B-58D-3			injection				LDC and pluton
555405	5.51305e+06	6B-60D-1			unit				LDC and pluton
556326	5.51266e+06	6B-60D-10			injection				LDC and pluton
556326	5.51265e+06	6B-60D-11			injection				LDC and pluton
556326	5.51262e+06	6B-60D-12			injection				LDC and pluton
556323	5.51258e+06	6B-60D-13			injection				LDC and pluton
556303	5.51254e+06	6B-60D-14			injection				LDC and pluton
556285	5.51249e+06	6B-60D-15			injection				LDC and pluton
556277	5.51247e+06	6B-60D-16			injection				LDC and pluton
556264	5.51272e+06	6B-60D-17			injection				LDC and pluton
556432	5.5128e+06	6B-60D-18							only LDC
556929	5.51256e+06	6B-60D-19			injection			injection	LDC and pluton
555926	5.51258e+06	6B-60D-2			injection				LDC and pluton
556976	5.51258e+06	6B-60D-20			injection			injection	LDC and pluton
557264	5.51254e+06	6B-60D-21				injection		injection	LDC and pluton
556013	5.51246e+06	6B-60D-3							only LDC
556332	5.51283e+06	6B-60D-4							only LDC
556310	5.51282e+06	6B-60D-5			unit				LDC and pluton
556318	5.51278e+06	6B-60D-6							only LDC
556314	5.51275e+06	6B-60D-7			unit				LDC and pluton
556317	5.51271e+06	6B-60D-8							only LDC
556328	5.51269e+06	6B-60D-9							only LDC
556921	5.51497e+06	6B-63D-1			unit
556988	5.5148e+06	6B-63D-2	6B-63D-1C	pegmatite	unit						yes	75.1	-0.1	14.2	2.04	1.21	5.38	0.18	0.02	0.13	0.95		0.02	0.02	0.05		0.04	0.4		29	175	7	3	70	9		6	7	394	-1.3
556988	5.5148e+06	6B-63D-2	6B-63D-1A	leucotonalite	unit					yes	yes	75	0.17	14.4	2.28	1.7	4.5	0.47	0.02	0.64	1.01		0.03	0.02	0.05		0.08	1.1		41	215	8	5	121	24	3	7	7	787	5
559745	5.51732e+06	6B-64D-1			injection	unit	enclave	enclave	enclave LDC in pluton
560145	5.51801e+06	6B-64D-10			injection	unit	enclave
560219	5.51804e+06	6B-64D-11			injection	unit	enclave
560076	5.51779e+06	6B-64D-12			injection	unit	enclave		enclave LDC in pluton
559856	5.51764e+06	6B-64D-13			injection	unit	enclave		enclave LDC in pluton
559835	5.5173e+06	6B-64D-2			injection	unit	enclave	enclave	enclave LDC in pluton
559915	5.51737e+06	6B-64D-3			injection	unit	enclave	enclave	enclave LDC in pluton
559896	5.51772e+06	6B-64D-4			injection	unit	enclave		enclave LDC in pluton
559925	5.51776e+06	6B-64D-5			injection	unit	enclave		enclave LDC in pluton
559962	5.5178e+06	6B-64D-6			injection	unit	enclave		enclave LDC in pluton
559997	5.51784e+06	6B-64D-7			injection	unit	enclave		enclave LDC in pluton
560026	5.51786e+06	6B-64D-8			injection	unit	enclave		enclave LDC in pluton
560052	5.5179e+06	6B-64D-9			injection	unit	enclave		enclave LDC in pluton
559192	5.51785e+06	6B-68D-2	6B-68D-2D		injection	unit		enclave	enclave LDC in pluton
559536	5.51804e+06	6B-68D-3			unit
554939	5.51365e+06	6B-72D-1				injection			LDC and pluton
555173	5.5138e+06	6B-72D-2				unit		enclave	enclave LDC in pluton
554455	5.51139e+06	6B-75D-1			injection				LDC and pluton
555147	5.51267e+06	6B-75D-10	6B-75D-5	tonalite		unit				yes
555319	5.51333e+06	6B-75D-11				unit
555410	5.51345e+06	6B-75D-12			injection	injection			LDC and pluton
555494	5.51349e+06	6B-75D-13			injection	injection			LDC and pluton
554527	5.5114e+06	6B-75D-2			injection				LDC and pluton
554601	5.51138e+06	6B-75D-3			injection				LDC and pluton
554546	5.51159e+06	6B-75D-4			injection	injection		injection	LDC and pluton
554639	5.51175e+06	6B-75D-5	6B-75D-2E	dyke	injection	unit	injection	unit	LDC and pluton	yes	yes	69.1	0.27	16.3	2.9	1.45	5.02	1.53	0.03	0.92	1.32		0.08	0.02	0.07		0.08	1.02		33	240	8	6	91	11	3	14	22	420	26	17.61	31.23	11.46	1.462	0.45	2.07	0.1	0.177
554639	5.51175e+06	6B-75D-5	6B-75D-2C	dyke	injection	unit	injection	unit	LDC and pluton	yes	yes	59.3	0.41	18.1	4.99	2.88	3.63	3.76	0.06	1.96	2.33		0.16	0.02	-0.01		0.04	2.24		70	343	11	5	81	37	5	86	155	912	68
554639	5.51175e+06	6B-75D-5	6B-75D-2F		injection	unit	injection	unit	LDC and pluton
554639	5.51175e+06	6B-75D-5	6B-75D-2G		injection	unit	injection	unit	LDC and pluton
554776	5.51186e+06	6B-75D-6	6B-75D-3A	tonalite	injection	unit	injection	unit	LDC and pluton		yes	72.3	0.17	15.1	2.18	3.04	4.6	0.76	0.03	0.66	0.99		0.06	0.02	0.19		0.08	0.98		47	284	10	7	68	16	2	11	16	720	15
554776	5.51186e+06	6B-75D-6	6B-75D-3C	dyke	injection	unit	injection	unit	LDC and pluton		yes	53.4	0.4	17.6	5.5	2.19	2.66	7.54	0.15	4.48	2.09		0.1	0.02	0.91		0.03	3.84		54	148	12	4	49	96	15	114	446	600	108
554776	5.51186e+06	6B-75D-6	6B-75D-3B		injection	unit	injection	unit	LDC and pluton
554933	5.51208e+06	6B-75D-7				unit
555083	5.51246e+06	6B-75D-8	6B-75D-4B	tonalite		unit				yes
555130	5.51256e+06	6B-75D-9				unit
557665	5.51655e+06	6B-76D-3			unit
557736	5.51665e+06	6B-76D-4			unit
557847	5.51671e+06	6B-76D-5				unit
558027	5.51701e+06	6B-76D-6			unit
558186	5.51721e+06	6B-76D-7			unit
558233	5.5173e+06	6B-76D-8			unit
548245	5.51357e+06	6C-10R-1				unit
547711	5.51283e+06	6C-10R-10				unit
547734	5.51286e+06	6C-10R-11				unit		unit
547649	5.51282e+06	6C-10R-12				unit
547579	5.51274e+06	6C-10R-13			injection			unit
547559	5.5127e+06	6C-10R-14	6C-10R-7					unit
547637	5.5126e+06	6C-10R-15						unit
548159	5.51357e+06	6C-10R-2				unit
548084	5.51364e+06	6C-10R-3				unit
548086	5.51369e+06	6C-10R-4				unit
547984	5.51365e+06	6C-10R-5				unit
548010	5.51361e+06	6C-10R-6				unit
547805	5.51372e+06	6C-10R-7				unit
547778	5.51361e+06	6C-10R-8				unit
547551	5.51357e+06	6C-10R-9				unit
553304	5.51157e+06	6C-11D-4			injection				LDC and pluton
553379	5.51167e+06	6C-11D-5	6C-11D-2	diorite	injection		injection	unit	enclave LDC in pluton	yes
553445	5.5117e+06	6C-11D-6			injection				LDC and pluton
553563	5.51173e+06	6C-11D-7			injection			injection	LDC and pluton
553678	5.51145e+06	6C-11D-8						injection	LDC and pluton
552102	5.51644e+06	6C-11R-1				unit
551446	5.51535e+06	6C-11R-10				unit
552252	5.51664e+06	6C-11R-2				unit
553884	5.51654e+06	6C-11R-3				unit
553523	5.51548e+06	6C-11R-4				unit	injection
553167	5.51541e+06	6C-11R-5				unit	injection	enclave
553180	5.51531e+06	6C-11R-6				unit
553145	5.51521e+06	6C-11R-7				unit
553077	5.51503e+06	6C-11R-8				unit
552337	5.51462e+06	6C-11R-9					unit
553265	5.51799e+06	6C-13R-2				unit
553211	5.51784e+06	6C-13R-4				unit
553796	5.51122e+06	6C-14D-2				injection		injection	LDC and pluton
550948	5.5142e+06	6C-14D-29			unit
553873	5.51135e+06	6C-14D-3				injection		unit	enclave LDC in pluton
553909	5.51136e+06	6C-14D-4				injection		unit	enclave LDC in pluton
553964	5.51134e+06	6C-14D-5				injection		unit	enclave LDC in pluton
550716	5.51365e+06	6C-15D-1			injection	unit		enclave
550787	5.51549e+06	6C-15D-10	6C-15D-4B	dyke	injection	unit				yes	yes	60.6	0.4	18.6	5.71	1.55	4.01	2.82	0.08	1.82	2.92		0.15	0.05	0.12		-0.01	1.78		37	524	11	6	85	57	26	23	37	558	73	17.66	33.42	16.05	2.214	0.64		0.13	0.284
550787	5.51549e+06	6C-15D-10	6C-15D-4G	dyke	injection	unit				yes
550787	5.51549e+06	6C-15D-10	6C-15D-4A		injection	unit
550787	5.51549e+06	6C-15D-10	6C-15D-4C		injection	unit
550787	5.51549e+06	6C-15D-10	6C-15D-4D		injection	unit
550787	5.51549e+06	6C-15D-10	6C-15D-4E		injection	unit
550702	5.51575e+06	6C-15D-11				unit
552919	5.51651e+06	6C-15D-12	6C-15D-5	tonalite		unit				yes	yes	69.89	0.27	15.95	3.67	1.38	4.58	1.07	0.06	1.39	1.23		0.07		0.06	0.27			99.89	50	398	11	7	111	47	5	11	20	419	29	11.97	22.63	8.606	1.536	0.66	1.75	0.1	0.129	0.03
553080	5.51667e+06	6C-15D-13				unit
553220	5.51663e+06	6C-15D-14			unit	unit
553122	5.51652e+06	6C-15D-15				unit
550914	5.51376e+06	6C-15D-2				unit
550928	5.51366e+06	6C-15D-3				unit
550919	5.51347e+06	6C-15D-4			unit	enclave
550686	5.51349e+06	6C-15D-5			unit
550666	5.51351e+06	6C-15D-6				unit	enclave
550640	5.51348e+06	6C-15D-7				unit	enclave
550776	5.51355e+06	6C-15D-8				unit
550588	5.5145e+06	6C-15D-9				unit
547968	5.51724e+06	6C-16D-21				unit
548055	5.5172e+06	6C-16D-22				unit
547817	5.51698e+06	6C-16D-23	6C-16D-5			unit
547915	5.51679e+06	6C-16D-24				unit
547806	5.51659e+06	6C-16D-25				unit
547001	5.51606e+06	6C-16D-26			injection	unit
545452	5.51734e+06	6C-30R-23				unit	enclave
545504	5.51758e+06	6C-30R-24						unit
545545	5.51763e+06	6C-30R-25	6C-30R-13A	leucotonalite		unit					yes	71.06	0.3	15.65	3.37	0.92	4.59	1.06	0.05	1.59	1.21		0.15		0.08	0.65			100.68	28	398	10	8	103	34	7	10	33	372	30
545623	5.51762e+06	6C-30R-26							only LDC
545599	5.51773e+06	6C-30R-27					unit		enclave LDC in pluton
545702	5.51768e+06	6C-30R-28				unit
545821	5.51798e+06	6C-30R-29							only LDC
553303	5.51798e+06	6C-77D-15	6C-77D-3A	tonalite		unit		injection		yes	yes	67.2	0.35	16.4	4.21	1.4	5	1.43	0.04	1.2	1.53		0.09	0.03	0.52		0.08	1.12		28	409	10	7	110	33	5	13	13	431	29
553303	5.51798e+06	6C-77D-15	6C-77D-3B			unit
550022	5.51586e+06	6C-7R-1				unit
547546	5.51483e+06	6C-7R-10				unit
547472	5.51484e+06	6C-7R-11			injection	unit
547432	5.51486e+06	6C-7R-12				unit
549320	5.51533e+06	6C-7R-2				unit
549116	5.51521e+06	6C-7R-3				unit
549022	5.51517e+06	6C-7R-4			injection	unit
549227	5.51424e+06	6C-7R-5				unit
548638	5.51412e+06	6C-7R-6				unit
548445	5.51413e+06	6C-7R-7				unit	unit
548440	5.51402e+06	6C-7R-8				unit
547830	5.51482e+06	6C-7R-9				unit
546240	5.51469e+06	6C-8D-1				unit
546123	5.51322e+06	6C-8D-10			injection	unit	enclave
546151	5.51325e+06	6C-8D-11			injection	unit
545986	5.51296e+06	6C-8D-12				unit		enclave
545838	5.51291e+06	6C-8D-13	6C-8D-5A	diorite	injection	unit	enclave			yes
545838	5.51291e+06	6C-8D-13	6C-8D-5C		injection	unit		enclave
545734	5.51274e+06	6C-8D-14	6C-8D-6	meladiorite		injection	unit	unit		yes	yes	55.42	0.62	20.19	7.91	0.66	4.17	3.4	0.092	3.98	1.64		0.11	0.08	0.61	0.45			99.33	14	500	14	6	86	62	31	39	37	198	108	9.689	21.79	14.46	2.99	0.97	2.73	0.31	0.389	0.1
545660	5.51267e+06	6C-8D-15					unit	unit
545650	5.51261e+06	6C-8D-16				injection	unit	unit
545605	5.51257e+06	6C-8D-17					unit	unit
545517	5.51235e+06	6C-8D-18					unit	enclave
545353	5.51217e+06	6C-8D-19					unit	enclave
546162	5.5135e+06	6C-8D-2				unit
545330	5.51213e+06	6C-8D-20					unit	enclave
545353	5.51207e+06	6C-8D-21					unit
545192	5.51206e+06	6C-8D-22					unit	enclave
546217	5.51354e+06	6C-8D-3				unit
546259	5.51356e+06	6C-8D-4				unit
546287	5.51354e+06	6C-8D-5				unit
546126	5.51345e+06	6C-8D-6				unit
546125	5.51342e+06	6C-8D-7				unit		enclave
546133	5.51337e+06	6C-8D-8				unit
546142	5.51315e+06	6C-8D-9				unit
552168	5.51516e+06	6C-8R-1				unit
551562	5.51481e+06	6C-8R-10				unit
551552	5.51485e+06	6C-8R-11				unit
551503	5.51494e+06	6C-8R-12				unit
551588	5.51497e+06	6C-8R-13					unit	enclave
551575	5.51504e+06	6C-8R-14					unit
551600	5.51511e+06	6C-8R-15					unit
551765	5.51508e+06	6C-8R-16					unit
551806	5.51522e+06	6C-8R-17				unit
551933	5.51518e+06	6C-8R-18					unit	enclave
551911	5.51508e+06	6C-8R-19					unit	enclave
552208	5.51512e+06	6C-8R-2				unit
551996	5.51503e+06	6C-8R-20	6C-8R-10	tonalite		unit		enclave		yes	yes	70.11	0.27	15.65	2	1.2	6.17	1.21	0.061	1.53	1.04		0.15		0.04	0.71			100.14	25	471	12	8	149	34	5	8	14	372	12
552107	5.51511e+06	6C-8R-21				unit
552216	5.51502e+06	6C-8R-3				unit
552182	5.51488e+06	6C-8R-4				unit
552110	5.51475e+06	6C-8R-5				unit
552032	5.51468e+06	6C-8R-6				unit
551833	5.5146e+06	6C-8R-7				unit
551643	5.51468e+06	6C-8R-8				unit
551789	5.51471e+06	6C-8R-9				unit
544716	5.5128e+06	6D-12D-1				injection	unit	enclave
543981	5.51215e+06	6D-12D-10				unit		enclave
544036	5.51217e+06	6D-12D-11			injection	unit
544212	5.51216e+06	6D-12D-12			injection	injection	unit	enclave
544222	5.51204e+06	6D-12D-13					unit	enclave
544268	5.51202e+06	6D-12D-14					unit	enclave
544293	5.51196e+06	6D-12D-15			injection	injection	unit	enclave
544317	5.51192e+06	6D-12D-16			injection	injection	unit	enclave
544371	5.51189e+06	6D-12D-17			injection	injection	unit	enclave
544418	5.51188e+06	6D-12D-18					unit
544441	5.51185e+06	6D-12D-19					unit	enclave
544643	5.51272e+06	6D-12D-2						unit
544476	5.51184e+06	6D-12D-20						unit
544498	5.51181e+06	6D-12D-21						unit
544483	5.51178e+06	6D-12D-22					unit	enclave
544199	5.51148e+06	6D-12D-23					unit	enclave
544118	5.51144e+06	6D-12D-24			injection	injection		unit
544584	5.51265e+06	6D-12D-3			injection		unit
543632	5.51171e+06	6D-12D-4	6D-12D-1	diorite	injection	injection	unit	unit		yes
543773	5.51192e+06	6D-12D-5					unit	unit
543839	5.51189e+06	6D-12D-6					unit
543971	5.512e+06	6D-12D-7	9M-12R-2B		unit
543971	5.512e+06	6D-12D-7	9M-12R-2C		unit
543984	5.51207e+06	6D-12D-8				unit	enclave
543981	5.51211e+06	6D-12D-9				unit
542452	5.51383e+06	6D-12R-5					unit
541527	5.51151e+06	6D-1D-1	6D-1D-1A		injection	injection		unit	enclave LDC in pluton
541419	5.51178e+06	6D-1D-2				injection		unit	enclave LDC in pluton
541377	5.51181e+06	6D-1D-3			injection	unit
541792	5.5121e+06	6D-1D-4						unit
541743	5.51196e+06	6D-1D-5							only LDC
541658	5.51175e+06	6D-1D-6				unit
541528	5.51174e+06	6D-1D-7			injection				LDC and pluton
540813	5.51499e+06	6D-1D-8			injection	injection	injection	injection	LDC and pluton
540293	5.51492e+06	6D-1D-9				unit
540244	5.51506e+06	6D-1R-1				unit
539913	5.51506e+06	6D-1R-2				unit		enclave
539697	5.51508e+06	6D-1R-3				unit		enclave	enclave LDC in pluton
539648	5.51519e+06	6D-1R-4				unit		enclave	enclave LDC in pluton
539804	5.5153e+06	6D-1R-5	6D-1R-3C			unit	enclave	enclave
539837	5.51546e+06	6D-1R-6				unit	enclave	enclave
539975	5.51556e+06	6D-1R-7				unit
539493	5.51474e+06	6D-1R-8				unit		enclave	enclave LDC in pluton
539606	5.51515e+06	6D-1R-9				unit		injection	enclave LDC in pluton
537397	5.51606e+06	6D-21D-1			unit	unit		enclave	enclave LDC in pluton
537384	5.51618e+06	6D-21D-2			injection	unit	unit	unit	enclave LDC in pluton
537250	5.51607e+06	6D-21D-3	6D-21D-2		injection			unit	enclave LDC in pluton
544623	5.51535e+06	6D-31R-30			injection		unit	enclave
544578	5.51533e+06	6D-31R-31					unit
544555	5.5153e+06	6D-31R-32				unit
544511	5.51533e+06	6D-31R-33			injection	unit	enclave
543825	5.5159e+06	6D-39D-10	6D-39D-7	dyke	injection	injection	unit			yes	yes	57.5	0.36	17.2	6.84	0.16	4.28	5.8	0.09	3.01	2.7		0.09	0.02	0.05		0.01	2.1		43	280	12	4	55	56	5	75	278	462	94	11.21	22.32	11.34	1.86	0.63	1.005	0.25	0.195
543844	5.51588e+06	6D-39D-11	6F-39D-8A	diorite	injection	injection	unit			yes	yes	60.68	0.8	16.77	5.9	0.89	3.68	3.23	0.101	4.31	1.9		0.32		0.1	0.73			99.41	26	369	15	11	143	79	40	40	68	213	101
543862	5.51589e+06	6D-39D-12			injection	injection	unit
543891	5.51589e+06	6D-39D-13			injection	injection	unit
544013	5.5159e+06	6D-39D-14			injection	unit
544107	5.51603e+06	6D-39D-15				unit
544213	5.51617e+06	6D-39D-16			injection	injection	unit	enclave
544309	5.51611e+06	6D-39D-17			injection	unit			enclave LDC in pluton
544509	5.51615e+06	6D-39D-18	6D-39D-11A	diorite	injection	unit			enclave LDC in pluton	yes	yes	67.39	0.33	15.06	3.4	2.95	3.43	1.44	0.051	1.79	1.24		0.08		1.57	0.83			99.56	68	221	12	7	113	40	5	14	20	537	37
544565	5.51609e+06	6D-39D-19			injection	injection			LDC and pluton
544621	5.51609e+06	6D-39D-20			injection	injection			LDC and pluton
543044	5.51746e+06	6D-39D-5				injection	injection		LDC and pluton
544059	5.51736e+06	6D-39D-6			injection	unit	unit		enclave LDC in pluton
544012	5.51675e+06	6D-39D-7			injection	unit		unit	enclave LDC in pluton
543723	5.51593e+06	6D-39D-8			injection	unit	unit	unit	enclave LDC in pluton
543809	5.51592e+06	6D-39D-9	6D-39D-6		injection	injection	unit
539171	5.51241e+06	6D-3D-1				unit
539063	5.51281e+06	6D-3D-2			injection	unit
539149	5.51288e+06	6D-3D-3				unit
539208	5.51293e+06	6D-3D-4				unit
539401	5.51342e+06	6D-3D-5	6D-3D-2B			unit
539618	5.51366e+06	6D-3D-6				unit	unit		enclave LDC in pluton
539648	5.51367e+06	6D-3D-7				injection	unit	unit	enclave LDC in pluton
539640	5.514e+06	6D-3D-8	6D-3D-3A	tonalite		unit	enclave	enclave			yes	70.85	0.14	16.74	4.17	0.3	6.16	0.84	0.015	0.46	0.53		0.03		0.25	0.13			100.61		1160	6	6	69	7	1	10	15	504	10
539640	5.514e+06	6D-3D-8	6D-3D-3B	tonalite		unit	enclave	enclave		yes
539640	5.514e+06	6D-3D-8	6D-3D-3D	leucotonalite		unit	enclave	enclave		yes	yes	71.45	0.13	17.01	3.74	0.24	6.45	0.45	0.015	0.27	0.5		0.01		0.18	0.11			100.55		1035	6	6	63	5	1	10	21	577	7
539640	5.514e+06	6D-3D-8	6D-3D-3C	diorite		unit	enclave	enclave		yes	yes	46.02	0.07	18.88	11.11	1.33	1.3	11.8	0.102	4.45	2.2				0.06	1.99			99.31	28	215	7	7	4	54	3	286	261	293	67
538682	5.51144e+06	6D-9D-21			injection			unit	enclave LDC in pluton
538762	5.51144e+06	6D-9D-22			unit			enclave	enclave LDC in pluton
538755	5.51158e+06	6D-9D-23			injection	unit	unit	unit	LDC and pluton
536378	5.5182e+06	6E-17R-1							only LDC
536695	5.51795e+06	6E-17R-10				injection			LDC and pluton
536521	5.51882e+06	6E-17R-11	6E-17R-9	gabbro					only LDC	yes
537107	5.51934e+06	6E-17R-12						injection	LDC and pluton
537512	5.51951e+06	6E-17R-13							only LDC
537579	5.51937e+06	6E-17R-14							only LDC
537777	5.51943e+06	6E-17R-15					injection		LDC and pluton
537981	5.51933e+06	6E-17R-16					injection		LDC and pluton
538080	5.51942e+06	6E-17R-17							only LDC
537949	5.51988e+06	6E-17R-18							only LDC
538073	5.52015e+06	6E-17R-19	6E-17R-11C	dyke			injection		LDC and pluton	yes	yes	50	1.02	16.4	7.46	0.01	0.61	7.73	0.15	7.47	2.99		0.22	0.02	0.57		0.02	5.38			244	17	9	117	88	16	106	128	268	153
536520	5.51827e+06	6E-17R-2						injection	LDC and pluton
538175	5.52011e+06	6E-17R-20							only LDC
538363	5.52008e+06	6E-17R-21							only LDC
538544	5.52021e+06	6E-17R-22				injection			LDC and pluton
536962	5.52013e+06	6E-17R-23	6E-17R-14			injection			LDC and pluton
537132	5.52012e+06	6E-17R-24						injection	LDC and pluton
537088	5.52043e+06	6E-17R-25							only LDC
537285	5.5208e+06	6E-17R-26				injection			LDC and pluton
536634	5.51865e+06	6E-17R-3			unit			enclave	enclave LDC in pluton
536731	5.51866e+06	6E-17R-4						injection	LDC and pluton
536764	5.51861e+06	6E-17R-5							only LDC
536700	5.51851e+06	6E-17R-6			injection				LDC and pluton
536669	5.51841e+06	6E-17R-7	6E-17R-5A						only LDC
536658	5.51829e+06	6E-17R-8					injection		LDC and pluton
536649	5.5182e+06	6E-17R-9				injection			LDC and pluton
537136	5.51846e+06	6E-22D-1							only LDC
536867	5.52063e+06	6E-22D-10	6E-22D-4A				injection		LDC and pluton
536867	5.52063e+06	6E-22D-10	6E-22D-4B				injection		LDC and pluton
536920	5.52073e+06	6E-22D-11							only LDC
537047	5.52082e+06	6E-22D-12							only LDC
536971	5.52094e+06	6E-22D-13							only LDC
536806	5.52085e+06	6E-22D-14					injection		LDC and pluton
536487	5.52065e+06	6E-22D-15							only LDC
536178	5.52042e+06	6E-22D-16							only LDC
536130	5.52045e+06	6E-22D-17							only LDC
536225	5.5195e+06	6E-22D-18							only LDC
536132	5.51962e+06	6E-22D-19			injection				LDC and pluton
537151	5.51854e+06	6E-22D-2	6E-22D-2	dyke			injection		LDC and pluton	yes	yes	53	1.02	16.6	9.41	0.05	3.71	6.01	0.07			6.22	0.36	0.37	0.28		0.01	2.52			882	15	13	138	43	5	150	158	150	125
536109	5.51967e+06	6E-22D-20	6E-22D-6A	meladiorite	injection				LDC and pluton	yes
536109	5.51967e+06	6E-22D-20	6E-22D-6B		injection				LDC and pluton
536078	5.51979e+06	6E-22D-21			injection				LDC and pluton
536004	5.51983e+06	6E-22D-22			injection			injection	LDC and pluton
537203	5.51854e+06	6E-22D-3							only LDC
537315	5.51854e+06	6E-22D-4					injection		LDC and pluton
537327	5.51853e+06	6E-22D-5					injection		LDC and pluton
537351	5.51854e+06	6E-22D-6					injection		LDC and pluton
537311	5.51866e+06	6E-22D-7					injection		LDC and pluton
536738	5.52061e+06	6E-22D-8							only LDC
536770	5.52059e+06	6E-22D-9							only LDC
536282	5.52253e+06	6E-23D-10							only LDC
536220	5.52246e+06	6E-23D-11							only LDC
537565	5.52276e+06	6E-23D-5							only LDC
537455	5.52247e+06	6E-23D-6							only LDC
537384	5.52251e+06	6E-23D-7							only LDC
536546	5.52251e+06	6E-23D-8							only LDC
536468	5.52252e+06	6E-23D-9							only LDC
539845	5.51822e+06	6E-27D-1			injection				LDC and pluton
539612	5.51811e+06	6E-27D-2	6D-27D-2	tonalite	injection			injection	LDC and pluton	yes
544896	5.51875e+06	6E-39D-1			injection	injection	injection	injection	LDC and pluton
544087	5.51823e+06	6E-39D-2				injection	injection		LDC and pluton
543929	5.51834e+06	6E-39D-3				injection	injection		LDC and pluton
544263	5.518e+06	6E-39D-4			unit			unit	LDC and pluton
552293	5.51868e+06	6F-13R-1			unit
553067	5.52109e+06	6F-13R-10				unit
552956	5.52102e+06	6F-13R-11					unit	enclave	enclave LDC in pluton
549432	5.51921e+06	6F-13R-12				unit
549334	5.51895e+06	6F-13R-13				unit
550414	5.51922e+06	6F-13R-14				unit
550244	5.51896e+06	6F-13R-15				unit
550399	5.51847e+06	6F-13R-16				unit
553630	5.52089e+06	6F-13R-7	6F-13R-5	meladiorite				unit		yes
553559	5.52089e+06	6F-13R-8						unit
553129	5.52119e+06	6F-13R-9						unit
550397	5.52142e+06	6F-16D-1				unit
548920	5.51956e+06	6F-16D-10				unit
548791	5.51953e+06	6F-16D-11				unit
548831	5.51934e+06	6F-16D-12				unit
548933	5.51933e+06	6F-16D-13				unit
548914	5.51926e+06	6F-16D-14				unit
548530	5.51868e+06	6F-16D-15				unit
548616	5.51856e+06	6F-16D-16				unit
548537	5.51854e+06	6F-16D-17				unit
548738	5.5184e+06	6F-16D-18				unit
548302	5.51836e+06	6F-16D-19				unit		enclave
550190	5.52152e+06	6F-16D-2				unit
548248	5.51827e+06	6F-16D-20				unit
549699	5.52087e+06	6F-16D-3	6F-16D-3	tonalite		unit					yes	73.24	0.18	14.73	2.44	1.78	4.8	0.69	0.042	0.6	1.25		0.03		0.05	0.29			100.12	41	302	11	9	87	26	4	8	17	435	17	24.64	46.7	18.06	2.498	0.47		0.05	0.085	0.07
549688	5.52084e+06	6F-16D-4				unit
549638	5.52072e+06	6F-16D-5				unit
549039	5.51987e+06	6F-16D-6				unit
549059	5.51976e+06	6F-16D-7				unit
549208	5.51967e+06	6F-16D-8				unit
549129	5.51955e+06	6F-16D-9				unit
550286	5.52309e+06	6F-29R-1				unit
548371	5.52245e+06	6F-29R-10				unit
548103	5.52209e+06	6F-29R-11				unit
550015	5.52306e+06	6F-29R-2				unit
549917	5.52322e+06	6F-29R-3				unit
549750	5.5231e+06	6F-29R-4				unit
549539	5.5231e+06	6F-29R-5				unit
549281	5.52294e+06	6F-29R-6				unit
549188	5.52286e+06	6F-29R-7				unit
548983	5.52279e+06	6F-29R-8				unit
548682	5.52263e+06	6F-29R-9				unit
546390	5.52285e+06	6F-30R-1					injection		LDC and pluton
547742	5.52208e+06	6F-30R-10				unit
548232	5.52177e+06	6F-30R-12	6F-30R-4B	dyke		unit		injection		yes	yes	50	0.62	12.3	10.5	0.07	3.22	11.31	0.14			7.58	0.25	0.39	1.13		-0.01	2.88			863	15	16	117	136	4	323	514	293	102
547994	5.52141e+06	6F-30R-13				unit
547667	5.52083e+06	6F-30R-14	6F-30R-6	tonalite		unit				yes
547525	5.52055e+06	6F-30R-15				unit
547205	5.52003e+06	6F-30R-16				unit
547158	5.52011e+06	6F-30R-17			unit
547176	5.52022e+06	6F-30R-18			injection			unit
547144	5.52027e+06	6F-30R-19			injection			unit
546298	5.52286e+06	6F-30R-2							only LDC
547178	5.52035e+06	6F-30R-20			injection		unit
547208	5.52038e+06	6F-30R-21				unit
547212	5.52045e+06	6F-30R-22				unit		enclave
546401	5.52274e+06	6F-30R-3	6F-30R-1B			unit
546556	5.52253e+06	6F-30R-4				unit
546625	5.52251e+06	6F-30R-5	6F-30R-2			unit
547193	5.52269e+06	6F-30R-6				unit
547308	5.52264e+06	6F-30R-7				unit
547523	5.52276e+06	6F-30R-8				unit
547663	5.52213e+06	6F-30R-9				unit
545447	5.51832e+06	6F-31R-1	6F-31R-1A		injection		unit		enclave LDC in pluton
545836	5.51887e+06	6F-31R-10			injection		unit
545938	5.51895e+06	6F-31R-11			injection			unit
545940	5.519e+06	6F-31R-12			injection	injection	unit	enclave	enclave LDC in pluton
545902	5.51902e+06	6F-31R-13			injection	injection	unit	enclave	enclave LDC in pluton
545866	5.51893e+06	6F-31R-14					unit	enclave	enclave LDC in pluton
545960	5.51904e+06	6F-31R-15			injection	injection	unit	enclave	enclave LDC in pluton
545932	5.51905e+06	6F-31R-16			injection	injection	unit	enclave	enclave LDC in pluton
545910	5.51907e+06	6F-31R-17	6F-31R-8		injection	injection	unit	enclave	enclave LDC in pluton
545976	5.51912e+06	6F-31R-18			injection	injection	unit	enclave	enclave LDC in pluton
546013	5.51923e+06	6F-31R-19						unit	enclave LDC in pluton
545418	5.51842e+06	6F-31R-2					unit	enclave	enclave LDC in pluton
546074	5.51926e+06	6F-31R-20			injection			unit
546139	5.51914e+06	6F-31R-21				unit		enclave
546182	5.51922e+06	6F-31R-22				unit		enclave
546279	5.51931e+06	6F-31R-23				unit	enclave
546292	5.51935e+06	6F-31R-24			injection	unit		enclave
546376	5.51943e+06	6F-31R-25			injection	unit		enclave
546463	5.51987e+06	6F-31R-26				unit
546474	5.51993e+06	6F-31R-27	6F-31R-14	diorite			unit	enclave	enclave LDC in pluton	yes
546535	5.52e+06	6F-31R-28			injection	unit	unit	enclave	enclave LDC in pluton
546540	5.52005e+06	6F-31R-29			injection	unit	unit	enclave	enclave LDC in pluton
545420	5.51849e+06	6F-31R-3					injection		LDC and pluton
545444	5.51855e+06	6F-31R-4			injection		unit
545488	5.51855e+06	6F-31R-5					unit		enclave LDC in pluton
545547	5.51859e+06	6F-31R-6			injection		unit		enclave LDC in pluton
545840	5.51875e+06	6F-31R-7			injection		unit		enclave LDC in pluton
545851	5.51883e+06	6F-31R-8			injection	unit	enclave	enclave
545810	5.51883e+06	6F-31R-9			injection	unit	enclave	enclave
550352	5.52334e+06	6F-37D-1					unit
549875	5.52341e+06	6F-37D-10					unit
549829	5.52339e+06	6F-37D-11				unit		enclave
549780	5.52335e+06	6F-37D-12	6F-37D-3			unit
549649	5.52336e+06	6F-37D-13				unit
549586	5.52333e+06	6F-37D-14				unit
549544	5.52328e+06	6F-37D-15				unit
549271	5.52315e+06	6F-37D-16				unit
549227	5.52313e+06	6F-37D-17				unit
549178	5.5231e+06	6F-37D-18				unit
549106	5.52302e+06	6F-37D-19				unit
550179	5.52358e+06	6F-37D-2							only LDC
549098	5.52298e+06	6F-37D-20				unit
549020	5.52297e+06	6F-37D-21				unit
548989	5.52295e+06	6F-37D-22				unit
548870	5.52292e+06	6F-37D-23				unit
548681	5.5228e+06	6F-37D-24				unit
548210	5522178	6F-37D-25	6F-37D-4B	dyke		unit		injection		yes	yes	44.6	0.6	10.4	14.5	0.03	0.81	12.2	0.22	4.66	2.78		0.21	0.03	5.57		0.04	4.2			864	14	14	97	219	1	442	592	17	109
548272	5.52259e+06	6F-37D-26				unit
548327	5.52279e+06	6F-37D-27				unit
548323	5.52282e+06	6F-37D-28				unit
548421	5.52293e+06	6F-37D-29				unit
550119	5.52349e+06	6F-37D-3				injection	unit		enclave LDC in pluton
548511	5.52303e+06	6F-37D-30				unit
549265	5.5237e+06	6F-37D-31							only LDC
549264	5.52376e+06	6F-37D-32							only LDC
549281	5.52379e+06	6F-37D-33							only LDC
549322	5.52384e+06	6F-37D-34							only LDC
549337	5.5239e+06	6F-37D-35							only LDC
550082	5.52347e+06	6F-37D-4					unit
550035	5.52345e+06	6F-37D-5					unit	enclave
550028	5.52342e+06	6F-37D-6					unit		enclave LDC in pluton
549985	5.52336e+06	6F-37D-7					unit		enclave LDC in pluton
549945	5.52338e+06	6F-37D-8				injection	unit		enclave LDC in pluton
549957	5.5234e+06	6F-37D-9					unit		enclave LDC in pluton
545327	5.52103e+06	6F-38D-1	6F-38D-1F	dyke	injection	injection	unit	injection	LDC and pluton	yes	yes	59	0.71	17.4	7.03	0.24	2.57	4.13	0.09	5.01	2.45		0.15	0.08	0.09		0.01	3.06		5	201	16	8	140	70	41	71	103	78	132
545327	5.52103e+06	6F-38D-1	6F-38D-1H	diorite	injection	injection	unit	injection	LDC and pluton	yes	yes	49.7	0.65	18.9	9.62	0.85	2.07	6.99	0.121	6.7	1.59		0.08		0.15	1.83			99.25	21	201	11	6	41	85	21	109	147	134	203
546957	5.52027e+06	6F-38D-10				injection	unit	enclave
546882	5.52031e+06	6F-38D-11	6F-38D-8A			injection	unit	enclave
546744	5.52028e+06	6F-38D-12
546623	5.52017e+06	6F-38D-13
547161	5.52053e+06	6F-38D-2			injection		unit	enclave	enclave LDC in pluton
547101	5.52049e+06	6F-38D-3	6F-38D-3A			injection	unit	enclave
547088	5.52046e+06	6F-38D-4	6F-38D-4B	tonalite		injection	unit	enclave			yes	78.81	0.04	12.71	1.05	1.66	4.84	0.09	0.024	0.07	0.67				0.25	0.05			100.26	24	75	8	7	23	7	1	8	22	592	3	10.4	24.96	9.535	1.778	0.35	0.81	0.15	0.164	0.07
547075	5.52043e+06	6F-38D-5				injection	unit	enclave
547065	5.52038e+06	6F-38D-6	6F-38D-5A			injection	unit	enclave
547071	5.52033e+06	6F-38D-7				injection	unit	enclave
546994	5.5203e+06	6F-38D-8	6F-38D-6A	tonalite		injection	unit	enclave		yes
546994	5.5203e+06	6F-38D-8	6F-38D-6C	diorite		injection	unit	enclave		yes
547000	5.52027e+06	6F-38D-9	6F-38D-7			injection	unit	enclave
562622	5.52277e+06	6G-10D-1			unit
562641	5.52356e+06	6G-10D-10				unit
562626	5.52354e+06	6G-10D-11				unit
562617	5.52355e+06	6G-10D-12			unit
562624	5.52358e+06	6G-10D-13			unit	unit
562625	5.52367e+06	6G-10D-14			injection	injection	unit	unit
562652	5.52371e+06	6G-10D-15			injection	unit		enclave
562512	5.52379e+06	6G-10D-16				unit
562494	5.52369e+06	6G-10D-17				unit
562753	5.52398e+06	6G-10D-18				unit		enclave
562775	5.52406e+06	6G-10D-19				unit		enclave
562747	5.52285e+06	6G-10D-2			unit
562800	5.52414e+06	6G-10D-20				unit		enclave
562813	5.52286e+06	6G-10D-3	6G-10D-2A	dyke	unit		unit			yes
562857	5.52285e+06	6G-10D-4				unit
562893	5.52283e+06	6G-10D-5					unit
562945	5.52283e+06	6G-10D-6			injection			injection
562832	5.52366e+06	6G-10D-8	6G-10D-4			unit
562800	5.5236e+06	6G-10D-9				unit
556876	5.52333e+06	6G-73D-10
558215	5.52402e+06	6G-73D-11	6G-73D-11F	dyke						yes	yes	48.9	0.62	20	12	0.02	2.02	6.34	0.09	4.87	2.97		0.09	0.02	0.16		-0.01	3.28			228	22	7	39	44	7	114	77	59	159
558215	5.52402e+06	6G-73D-11	6G-73D-11C	dyke						yes	yes	48.9	0.71	15.5	8.98	-0.05	0.55	8.42	0.11	7.14	1.51		0.13	0.03	3.06		0.19	4.93			146	12	6	65	78	26	251	193	39	142
558215	5.52402e+06	6G-73D-11	6G-73D-11B	dyke						yes	yes	68.9	0.38	17.2	2.62	0.93	5.9	0.94	0.01	1.03	0.85		0.09	0.03	0.05		0.12	1.26		28	266	8	5	93	15	11	11	12	330	16
558819	5.52503e+06	6G-73D-12	6J-73D-12	anorthosite						yes
556060	5.52131e+06	6G-73D-2	6G-73D-2	anorthosite		injection			LDC and pluton	yes
555406	5.52372e+06	6G-73D-5
555406	5.52455e+06	6G-73D-6	6G-73D-6B	dyke	injection				LDC and pluton	yes	yes	50.6	0.79	18.9	9.53	-0.05	0.11	6.18	0.07	6.64	2.57		0.08	0.11	0.14		0.16	4.66			154	15	4	43	97	25	127	142	36	207
555406	5.52455e+06	6G-73D-6	6G-73D-6E	dyke	injection				LDC and pluton	yes	yes	51.8	0.75	18.1	8.39	0.23	2.7	5.75	0.16	6.19	2.71		0.11	0.01	0.11		0.03	3.46		3	217	15	4	67	102	12	105	103	54	170
555406	5.52455e+06	6G-73D-6	6G-73D-6C		injection				LDC and pluton
555406	5.52455e+06	6G-73D-6	6G-73D-6D		injection				LDC and pluton
555406	5.52455e+06	6G-73D-6	6G-73D-6F		injection				LDC and pluton
555406	5.52455e+06	6G-73D-6	6G-73D-6G		injection				LDC and pluton
555406	5.52455e+06	6G-73D-6	6G-73D-6H		injection				LDC and pluton
556452	5.52414e+06	6G-73D-7							LDC and pluton
556580	5.52349e+06	6G-73D-8	6G-73D-8	anorthosite						yes
557119	5.52385e+06	6G-73D-9	6G-73D-9B	dyke						yes	yes	70.9	0.27	16.8	3.11	0.6	5.9	0.72	0.01	0.61	0.64		0.08	0.02	0.04		0.08	1.02		15	354	6	4	127	15	2	10	11	293	18	12.89	25.43	12.11	1.799	0.48	2.631	0.14	0.037
557119	5.52385e+06	6G-73D-9	6G-73D-9C	dyke						yes	yes	69.2	0.25	16.8	3.33	0.13	5.25	0.86	0.02	0.73	0.89		0.08	0.11	0.19		0.13	1.33		4	232	7	4	137	21	8	12	14	226	24
557119	5.52385e+06	6G-73D-9	6G-73D-9A	dyke						yes	yes	54	1.07	16.8	8.84	0.01	1.39	4.79	0.08	4.41	3.41		0.39	0.03	0.05		-0.01	3.62			322	22	11	165	56	10	81	119	72	164
559131	5.51835e+06	6G-76D-10			injection	unit	unit
559154	5.51844e+06	6G-76D-11			injection	unit	unit
559217	5.51856e+06	6G-76D-12				unit
559307	5.51866e+06	6G-76D-13	6B-76D-5		unit	enclave
559323	5.51867e+06	6G-76D-14	6G-76D-6	uncertain	injection	unit	enclave			yes
559005	5.51826e+06	6G-76D-9			unit
559615	5.51865e+06	6G-77D-1
561138	5.52006e+06	6G-77D-10				unit
561514	5.52033e+06	6G-77D-11			unit			enclave
562173	5.52093e+06	6G-77D-13			unit
560887	5.52048e+06	6G-77D-14				unit	enclave
560116	5.51899e+06	6G-77D-2			unit		enclave	enclave
560158	5.51902e+06	6G-77D-3			unit
560148	5.5191e+06	6G-77D-4			injection	unit
560288	5.5193e+06	6G-77D-5			injection				LDC and pluton
560347	5.51946e+06	6G-77D-6			unit
560482	5.51984e+06	6G-77D-7				unit
560583	5.51992e+06	6G-77D-8				unit
560659	5.51987e+06	6G-77D-9
562914	5.52421e+06	6H-10D-21			injection	unit	injection	injection
562984	5.52429e+06	6H-10D-22			injection	unit	injection	injection
563011	5.52344e+06	6H-10D-7					unit	enclave
566823	5.522e+06	6H-72D-1				unit
567414	5.52132e+06	6H-72D-10			unit
567295	5.52112e+06	6H-72D-11				unit			enclave LDC in pluton
567245	5.52111e+06	6H-72D-12	6H-72D-2	leucotonalite	unit					yes
567394	5.52097e+06	6H-72D-13							only LDC
567150	5.52031e+06	6H-72D-14			injection	injection	injection		LDC and pluton
566842	5.5205e+06	6H-72D-15			injection	injection	injection		LDC and pluton
566705	5.52031e+06	6H-72D-16			injection	injection	injection		LDC and pluton
566658	5.52157e+06	6H-72D-17				unit		enclave
566586	5.52158e+06	6H-72D-18				unit		enclave
566543	5.52168e+06	6H-72D-19				unit
566859	5.522e+06	6H-72D-2				unit
566546	5.52184e+06	6H-72D-20				unit
566899	5.522e+06	6H-72D-3				unit
567006	5.52198e+06	6H-72D-4				unit
567064	5.52201e+06	6H-72D-5				unit
567139	5.5217e+06	6H-72D-6			injection	unit	injection
567930	5.52179e+06	6H-72D-7			injection				LDC and pluton
567893	5.5217e+06	6H-72D-8			injection				LDC and pluton
567398	5.52139e+06	6H-72D-9			unit
561366	5.52985e+06	6J-61D-1	6J-61D-1A	tonalite		unit				yes	yes	65	0.42	18	2.29	1.21	6.03	2.29	0.02	2.25	1.33		0.18	0.02	1.12		0.13	1.67		27	702	11	5	118	26		29	35	486	47
560844	5.53034e+06	6J-61D-2	6J-61D-2C	tonalite		unit				yes	yes	66.2	0.35	17.1	1.54	1.77	5.83	1.77	0.03	1.86	0.99		0.13	0.02	0.62		0.12	1.5		33	407	11	6	104	21		23	23	653	35
560844	5.53034e+06	6J-61D-2	6J-61D-2A	dyke		unit				yes	yes	51.4	0.88	18.6	10.6	0.13	3.03	2.49	0.17	5.02	3.43		0.12	0.12	0.76		0.12	2.5		2	365	22	6	108	77	66	76	98	96	177
545764	5.52697e+06	6K-78D-5	6K-78D-5	dyke						yes	yes	67.4	0.33	14.6	3.15	2.62	3	1.04	0.11			2.86	0.09	1.09	3.91		0.14	1.3		71	118	12	6	99	137	23	10	12	626	30
552887	5.53273e+06	6N-79D-4	6N-79D-4	dyke						yes	yes	63.7	0.29	15.6	4.41	3.27	4.4	0.99	0.03			2.13	0.12	0.47	3.35		0.14	1.44		66	335	10	5	77	13	453	10	17	804	34
544485	5.51091e+06	9M-12D-25			unit
544495	5.51096e+06	9M-12D-26			unit			unit
544364	5.51101e+06	9M-12D-27			unit
544310	5.51089e+06	9M-12D-28			unit
544308	5.51092e+06	9M-12D-29			unit
544310	5.51087e+06	9M-12D-30			unit
540243	5.51098e+06	9M-12R-1				injection		unit
540270	5.51097e+06	9M-12R-2						unit
540310	5.51096e+06	9M-12R-3						unit
540350	5.51094e+06	9M-12R-4	9M-12R-4	meladiorite				unit		yes	yes	49.14	0.78	17.07	9.92	0.71	1.19	8.25	0.166	5.91	2.83		0.11	0.05	0.12	2.43			99.31	18	297	14	6	28	82	12	163	283	141	145
544982	5.5101e+06	9M-2R-1			injection			unit
543863	5.50958e+06	9M-2R-10				unit
543992	5.50972e+06	9M-2R-11				unit
544867	5.51004e+06	9M-2R-2	9M-2R-2				unit
544789	5.51005e+06	9M-2R-3				unit
544776	5.50996e+06	9M-2R-4				unit		enclave
544714	5.50984e+06	9M-2R-5				unit
544424	5.50994e+06	9M-2R-6					unit
544030	5.50955e+06	9M-2R-7	9M-2R-6B	tonalite		unit					yes	73.57	0.16	13.75	0.46	3.47	1.13	0.81	0.018	0.6	2.54		0.05	0.89	0.2	1.71			99.36	96	56	9	3	63	11		11	21	641	47
544120	5.5094e+06	9M-2R-9				unit
545058	5.50787e+06	9M-40D-12				unit
544991	5.50776e+06	9M-40D-13				unit
544966	5.50769e+06	9M-40D-14				unit
544864	5.50758e+06	9M-40D-15	9M-40D-5D	dyke		unit				yes	yes	68.5	0.13	15.1	2.77	4.3	1.99	0.59	0.04	1.09	1.75		0.05	0.08	2.27		0.13	1.83		110	85	11	5	71	8	138	8	10	837	11
544789	5.50757e+06	9M-40D-16				unit
544790	5.50753e+06	9M-40D-17				unit
543770	5.50866e+06	9M-41D-3	9M-41D-3J	tonalite		unit					yes	74.57	0.1	13.84	0.46	6.78	2.44		0.008	0.07	0.31		0.05	0.02	0.39	0.22			99.26	77	107	8	4	17	5	31	7		2821	19
543770	5.50866e+06	9M-41D-3	9M-41D-3F	tonalite		unit				yes	yes	69.28	0.18	15.73	0.27	2.65	5.78	0.85	0.007	0.73	2.83		0.06	0.11	0.07	0.94			99.49	62	256	8	5	84	10	195	13	21	634	23
543770	5.50866e+06	9M-41D-3	9M-41D-3C	tonalite		unit				yes	yes	69.35	0.21	15.53	0.62	3.31	5.59	1.01	0.014	0.33	2.16		0.07		0.45	1.1			99.74	74	150	10	5	65	12	1293	13	19	991	21
543770	5.50866e+06	9M-41D-3	9M-41D-3A	dyke		unit				yes	yes	65.9	0.29	17.1	1.69	2.82	6.5	0.88	0.02	0.51	1.85		0.09	0.04	1.04		0.08	1.08		49	304	8	4	85	17	155	14	20	968	20
543770	5.50866e+06	9M-41D-3	9M-41D-3B	dyke		unit				yes	yes	69	0.19	15.8	0.72	8	3.53	0.4	0.01	0.29	1.82		0.05	0.08	0.48		0.07	0.67		75	138	9	4	29	5	198	8	5	2474	17
543852	5.50865e+06	9M-41D-3	9M-41D-3G	dyke		unit				yes	yes	71.09	0.22	15.3	0.53	1.84	7.2	0.55	0.01	0.22	2.56		0.05	0.07	0.21		0.07	0.71		39	279	8	5	77	9	228	9	12	521	10
543770	5.50866e+06	9M-41D-3	9M-41D-3D			unit
543770	5.50866e+06	9M-41D-3	9M-41D-3H			unit
543770	5.50866e+06	9M-41D-3	9M-41D-3K			unit
543770	5.50866e+06	9M-41D-3	9M-41D-3K			unit
543770	5.50866e+06	9M-41D-3	9M-41D-3L			unit
544665	5.51064e+06	9M-41D-6			unit
544532	5.51068e+06	9M-41D-7	9M-41D-2	leucotonalite	unit					yes	yes	70.25	0.15	15.97	3.4	1.18	5.51	0.69	0.027	0.73	0.6		0.02		0.56	0.41			99.5	22	461	6	6	61	16	1	9	15	638	10	8.601	16.3	6.248	1.028	0.31	0.34	0.019	0.096	0.04
544375	5.5108e+06	9M-41D-8			unit		enclave	enclave	enclave LDC in pluton
544972	5.5103e+06	9M-4D-8				unit
544952	5.51036e+06	9M-4D-9				unit		enclave
543728	5.51062e+06	9M-9D-1				unit
543800	5.51041e+06	9M-9D-10			unit	injection		enclave
543817	5.51041e+06	9M-9D-11			unit	injection		enclave
544133	5.50988e+06	9M-9D-12	9M-9D-2	tonalite	injection	unit		enclave		yes
544263	5.50983e+06	9M-9D-13				unit		enclave
544262	5.50971e+06	9M-9D-14				unit
544278	5.50958e+06	9M-9D-15				unit
544201	5.50945e+06	9M-9D-16				unit		enclave
544163	5.50945e+06	9M-9D-17				unit		enclave
544192	5.50961e+06	9M-9D-18				injection	unit
544190	5.50965e+06	9M-9D-19				unit
543841	5.51057e+06	9M-9D-2				unit
544147	5.50973e+06	9M-9D-20				unit		enclave
543865	5.51056e+06	9M-9D-3						unit
543916	5.5105e+06	9M-9D-4			injection	unit		unit	enclave LDC in pluton
543898	5.51042e+06	9M-9D-5			unit
543714	5.5105e+06	9M-9D-6					unit	enclave
543744	5.51046e+06	9M-9D-7	9M-9D-1A			unit		enclave
543768	5.51045e+06	9M-9D-8				unit		enclave
543792	5.51043e+06	9M-9D-9			unit			enclave
553765	5.5111e+06	9N-14D-1						injection	LDC and pluton
553939	5.51068e+06	9N-14D-10			injection				LDC and pluton
554013	5.5106e+06	9N-14D-11						injection	LDC and pluton
554037	5.51057e+06	9N-14D-12						injection	LDC and pluton
554074	5.51053e+06	9N-14D-13				injection			LDC and pluton
553934	5.51004e+06	9N-14D-19							only LDC
553756	5.5099e+06	9N-14D-20						unit
553701	5.50989e+06	9N-14D-21						injection	LDC and pluton
548613	5.5067e+06	9N-2D-1	9M-2D-1A			unit
549277	5.50737e+06	9N-2D-2				unit
548937	5.50707e+06	9N-2D-3				unit
547829	5.5101e+06	9N-33R-1	9N-33R-1B	leucotonalite	unit	enclave					yes	77.68	0.12	10.14	3.04	2.14		0.46	0.046	0.67	1.76		0.06	0.15	1.93	1.3			99.5	38	273	8	2	59	18		7	7	609	13
547705	5.5101e+06	9N-33R-2			unit		enclave
547770	5.51022e+06	9N-33R-3			unit
546099	5.50674e+06	9N-40D-1				unit
545740	5.50701e+06	9N-40D-10				unit
545799	5.50749e+06	9N-40D-11				unit
546091	5.5067e+06	9N-40D-2				unit
545964	5.50675e+06	9N-40D-3				unit
545900	5.50684e+06	9N-40D-4				unit
545919	5.5069e+06	9N-40D-5				unit
545922	5.50693e+06	9N-40D-6				unit
545915	5.50698e+06	9N-40D-7				unit
545784	5.50693e+06	9N-40D-8				unit
545761	5.50698e+06	9N-40D-9				unit
546934	5.50665e+06	9N-41D-1				unit
546970	5.50665e+06	9N-41D-2				unit
546895	5.50673e+06	9N-41D-3				unit
546924	5.50676e+06	9N-41D-4				unit
546514	5.50958e+06	9N-41D-5	9M-41D-1C	dyke		unit	enclave			yes
545838	5.51002e+06	9N-4D-1				unit	enclave
545793	5.51003e+06	9N-4D-2				unit	enclave
545759	5.51005e+06	9N-4D-3				unit	enclave
545328	5.51019e+06	9N-4D-4			injection			unit
545238	5.51022e+06	9N-4D-5	9N-4D-3	tonalite		unit				yes	yes	63.66	0.31	18.48	3.64	1.87	4.85	2.38	0.048	1.73	1.52		0.11		0.42	1.41			100.43	42	535	9	7	81	27	5	27	43	696	52
545123	5.51026e+06	9N-4D-6				unit
545084	5.51027e+06	9N-4D-7					unit
546269	5.50677e+06	9N-4R-1				unit
546294	5.50698e+06	9N-4R-2				unit
546294	5.50703e+06	9N-4R-3				unit
546303	5.50724e+06	9N-4R-4				unit
546571	5.50729e+06	9N-4R-5				unit
546561	5.50709e+06	9N-4R-6				unit
546552	5.50697e+06	9N-4R-7				unit
546561	5.50691e+06	9N-4R-8				unit
546563	5.50687e+06	9N-4R-9				unit
550277	5.50917e+06	9N-5R-1				unit
550221	5.50889e+06	9N-5R-2				unit
550116	5.50846e+06	9N-5R-3				unit
550584	5.50886e+06	9N-5R-4				unit
550052	5.50816e+06	9N-5R-5				unit
550076	5.50944e+06	9N-6D-1			unit
549896	5.50912e+06	9N-6D-10			unit
550092	5.50928e+06	9N-6D-2			unit
550060	5.50876e+06	9N-6D-3			unit
549986	5.50842e+06	9N-6D-4			unit
549912	5.50822e+06	9N-6D-5			unit
549893	5.5083e+06	9N-6D-6			unit
549825	5.50839e+06	9N-6D-7			unit
549891	5.50841e+06	9N-6D-8			unit
549883	5.5086e+06	9N-6D-9			unit
551683	5.50876e+06	9N-6R-1							only LDC
550921	5.5076e+06	9N-6R-2				unit
550968	5.50744e+06	9N-6R-3				unit
550978	5.50735e+06	9N-6R-4				unit
551072	5.50698e+06	9N-6R-5				unit
551477	5.50763e+06	9N-6R-6				unit
551590	5.50799e+06	9N-6R-7				unit
551691	5.50851e+06	9N-6R-8	9N-6R-4B	gabbro				injection	LDC and pluton	yes	yes	49.38	0.22	10.2	10.58	0.72	0.53	13.68	0.195	5.66	4.19		0.02	0.02	0.07	3.39				20	82	10	0.5	17	85	6	128	225	99	162
551720	5.50861e+06	9N-6R-9						unit	enclave LDC in pluton
552696	5.53278e+06	9N-79D-2	9N-79D-2	dyke						yes	yes	68.8	0.23	17.2	3.6	0.89	6.33	0.78	0.02	1.02	0.74		0.13	0.06	0.44		0.08	0.8		21	838	7	5	84	19	24	10	11	408	17	16.68	35.52	18.26	2.496	0.69	1.893	0.15	0.138
552011	5.50889e+06	9N-7D-1							only LDC
551690	5.50704e+06	9N-7D-10				unit
551295	5.5062e+06	9N-7D-11
551394	5.50659e+06	9N-7D-12	9N-7D-6C			unit
551735	5.50702e+06	9N-7D-13				unit
551828	5.50715e+06	9N-7D-14				unit
551978	5.50732e+06	9N-7D-15			injection			unit
552099	5.5075e+06	9N-7D-16				injection		unit	enclave LDC in pluton
552213	5.50768e+06	9N-7D-17						unit	enclave LDC in pluton
551932	5.50881e+06	9N-7D-2							only LDC
551972	5.50868e+06	9N-7D-3			injection			injection	LDC and pluton
551911	5.50848e+06	9N-7D-4	9N-7D-2A	dyke	injection		injection		LDC and pluton	yes	yes	57.3	0.77	18.3	4.69	0.45	4.11	4.31	0.08	4.48	2.37		0.21	0.07	0.07		-0.01	3.14		11	226	19	11	150	60	28	62	65	145	106
551911	5.50848e+06	9N-7D-4	9N-7D-2B		injection		injection		LDC and pluton
551811	5.50813e+06	9N-7D-5			injection			unit	enclave LDC in pluton
551662	5.5079e+06	9N-7D-6				unit
551671	5.50743e+06	9N-7D-7				unit
551663	5.50737e+06	9N-7D-8				unit
551690	5.50699e+06	9N-7D-9				unit
553960	5.5098e+06	9N-9R-4						unit
554019	5.50981e+06	9N-9R-5						unit	LDC and pluton
553887	5.50981e+06	9N-9R-6	9N-9R-6C	diorite				injection	LDC and pluton	yes
553839	5.50981e+06	9N-9R-7							only LDC
553807	5.50981e+06	9N-9R-8						injection	LDC and pluton
554326	5.50959e+06	9O-13D-1						unit	LDC and pluton
554184	5.50814e+06	9O-13D-10						injection	LDC and pluton
554098	5.5082e+06	9O-13D-11						unit
554118	5.50831e+06	9O-13D-12				injection		unit	enclave LDC in pluton
554082	5.50847e+06	9O-13D-13
554111	5.50851e+06	9O-13D-14
554088	5.50864e+06	9O-13D-15							only LDC
554115	5.50877e+06	9O-13D-16							only LDC
554055	5.50882e+06	9O-13D-17							only LDC
554095	5.50895e+06	9O-13D-18							only LDC
554078	5.50908e+06	9O-13D-19							only LDC
554260	5.50934e+06	9O-13D-2			injection			unit	LDC and pluton
554088	5.50928e+06	9O-13D-20						unit	LDC and pluton
554310	5.5091e+06	9O-13D-3						unit	enclave LDC in pluton
554306	5.50903e+06	9O-13D-4							only LDC
554303	5.50885e+06	9O-13D-5
554306	5.50874e+06	9O-13D-6
554300	5.50865e+06	9O-13D-7			injection
554300	5.50856e+06	9O-13D-8						unit	LDC and pluton
554297	5.50851e+06	9O-13D-9					unit	enclave
554063	5.51047e+06	9O-14D-14						unit	LDC and pluton
554070	5.51041e+06	9O-14D-15							only LDC
554063	5.51037e+06	9O-14D-16			unit
554063	5.5103e+06	9O-14D-17						unit	enclave LDC in pluton
554068	5.51018e+06	9O-14D-18						injection	LDC and pluton
554519	5.5105e+06	9O-14D-22						injection	LDC and pluton
554526	5.51055e+06	9O-14D-23				injection			LDC and pluton
554532	5.51062e+06	9O-14D-24							only LDC
554553	5.51069e+06	9O-14D-25						injection	LDC and pluton
554536	5.51083e+06	9O-14D-26							only LDC
554524	5.51091e+06	9O-14D-27							only LDC
554467	5.51097e+06	9O-14D-28							only LDC
555773	5.50776e+06	9O-65D-1							only LDC
554683	5.50753e+06	9O-66D-10							only LDC
554686	5.5076e+06	9O-66D-11							only LDC
554906	5.50774e+06	9O-66D-12							only LDC
555039	5.50772e+06	9O-66D-13							only LDC
554701	5.50739e+06	9O-66D-4							only LDC
554708	5.50742e+06	9O-66D-5							only LDC
554701	5.50744e+06	9O-66D-6							only LDC
554701	5.50747e+06	9O-66D-7							only LDC
554667	5.50748e+06	9O-66D-8							only LDC
554706	5.50751e+06	9O-66D-9							only LDC
554406	5.5098e+06	9O-9R-1						unit
554363	5.5099e+06	9O-9R-2						injection	LDC and pluton
554244	5.50982e+06	9O-9R-3							only LDC
553699	5.53199e+06	BR-2	BR-2	dyke							yes	58.9	0.36	18.9	5.61	2.01	3.38	3.09	0.04	2.32	2.65		0.25	0.18	0.07		0.02	2.51		91	434	14	6	123	36	113	22	18	343	53
553606	5.53219e+06	BRAR	BRAR	dyke							yes	67.1	0.29	16.9	1.4	4.2	6.3	0.9	0.02	1.41	0.91		0.14	0.02	0.07		0.1	0.94		64	362	9	4	70	17	11	14	5	1484	27
548226	5.52436e+06	CAME	CAME-1	dyke							yes	68.9	0.31	15.8	1.93	1.62	5.08	1.02	0.02			2.57	0.07	2.3	0.71		0.11	1.25		48	200	10	6	97	23	67	10	13	548	31
548226	5.52436e+06	CAME	CAME-3	dyke							yes	38.2	0.73	11.1	13.6	-0.05	0.05	10.9	0.16			8.82	0.67	0.45	9.48		0.24	5.5			133	23	10	192	225	120	269	742		169
557455	5.53148e+06	GRY	GRY	tonalite							yes	67.76	0.25	16.45	0.65	3.67	3.2	1.23	0.06	1.2	2.83		0.12	0.18	0.29	1.82			99.71	100	58	14	4	95	25	56	15	12	698	33
563611	5.51338e+06	LETY	LETY	granophyre							yes	78.8	0.25	10.6	0.09	0.54	5.75	0.13	-0.01	1.05	2.77		0.002	0.03	0.07		0.02	0.22		11	114	115	30	410	11	17	4	8	185	-3
565623	5.5222e+06	PLD-1-1			unit		enclave
565504	5.5216e+06	PLD-1-10				unit		enclave
565430	5.52146e+06	PLD-1-11			unit	unit
565403	5.52141e+06	PLD-1-12				unit
565385	5.52129e+06	PLD-1-13				unit			enclave LDC in pluton
565403	5.52126e+06	PLD-1-14				unit			enclave LDC in pluton
565398	5.52122e+06	PLD-1-15				unit
565562	5.52219e+06	PLD-1-2			unit		enclave
565562	5.52216e+06	PLD-1-3			unit		enclave
565509	5.52187e+06	PLD-1-4			unit
560310	5.51934e+06	PLD-14-1
561130	5.51848e+06	PLD-14-10	PLD-14-6		unit
561210	5.5184e+06	PLD-14-11			unit				enclave LDC in pluton
561094	5.51833e+06	PLD-14-12			unit
560836	5.5183e+06	PLD-14-13			unit
560786	5.51833e+06	PLD-14-14			unit				enclave LDC in pluton
560766	5.51837e+06	PLD-14-15			unit
560737	5.5184e+06	PLD-14-16			unit			enclave	enclave LDC in pluton
560346	5.5193e+06	PLD-14-2
560426	5.51923e+06	PLD-14-3			injection	unit		unit	enclave LDC in pluton
560568	5.51906e+06	PLD-14-4			unit
560664	5.51897e+06	PLD-14-5			unit	enclave		enclave
560823	5.51882e+06	PLD-14-6	PLD-14-3		unit	injection		enclave	enclave LDC in pluton
560968	5.51866e+06	PLD-14-7	PLD-14-4		unit
560889	5.51859e+06	PLD-14-7	PLD-14-4		unit
561011	5.51862e+06	PLD-14-8			unit
561054	5.51849e+06	PLD-14-9			unit
565570	5.5219e+06	PLD-1-5			unit	unit	enclave	enclave	enclave LDC in pluton
565488	5.52176e+06	PLD-1-6				unit		enclave	enclave LDC in pluton
567027	5.52257e+06	PLD-16-1				unit
568090	5.52247e+06	PLD-16-10				unit
568045	5.52243e+06	PLD-16-11				unit
567971	5.52238e+06	PLD-16-12				unit
568007	5.5224e+06	PLD-16-13				unit
567990	5.52243e+06	PLD-16-14				unit
567998	5.52246e+06	PLD-16-15				unit
567759	5.52214e+06	PLD-16-16				unit
567710	5.52209e+06	PLD-16-17				unit
567675	5.52205e+06	PLD-16-18				unit
567632	5.52201e+06	PLD-16-19			injection	unit		enclave
567305	5.52251e+06	PLD-16-2				unit
567420	5.5221e+06	PLD-16-20				unit
567196	5.52224e+06	PLD-16-21				unit
567150	5.52222e+06	PLD-16-22				unit
566897	5.52202e+06	PLD-16-23				unit
566821	5.52202e+06	PLD-16-24				unit
566697	5.52198e+06	PLD-16-25				unit
567356	5.52253e+06	PLD-16-3			injection	unit
567423	5.52253e+06	PLD-16-4				unit
567883	5.52252e+06	PLD-16-5				unit
567932	5.52253e+06	PLD-16-6				unit
568226	5.52254e+06	PLD-16-7				unit
568286	5.52252e+06	PLD-16-8				unit
568120	5.52251e+06	PLD-16-9				unit
565438	5.5217e+06	PLD-1-7			unit	unit
559364	5.51851e+06	PLD-17-1			unit		enclave
559012	5.51759e+06	PLD-17-10			unit
558821	5.51752e+06	PLD-17-11	PLD-17-6	leucotonalite		unit				yes	yes	69.84	0.25	16.4	2.42	2.18	4.62	0.79	0.031	0.86	1.12		0.07		0.64	0.68			99.9	40	394	12	8	83	21	1	11	23	620	21
558657	5.5174e+06	PLD-17-12			unit
558606	5.51734e+06	PLD-17-13			unit
558553	5.51731e+06	PLD-17-14			unit
558411	5.51722e+06	PLD-17-15			unit
559118	5.51768e+06	PLD-17-16			unit			enclave	enclave LDC in pluton
559141	5.51777e+06	PLD-17-17	PLD-17-9		unit
559490	5.51848e+06	PLD-17-2			unit
559404	5.51835e+06	PLD-17-3			unit
559529	5.51807e+06	PLD-17-4			unit		enclave
559520	5.51773e+06	PLD-17-5			unit	unit	unit	unit	enclave LDC in pluton
559619	5.51754e+06	PLD-17-6			unit			unit
559726	5.51758e+06	PLD-17-7			unit			enclave
559469	5.51759e+06	PLD-17-8
559174	5.51763e+06	PLD-17-9			unit		enclave
565443	5.52167e+06	PLD-1-8				unit
565430	5.5216e+06	PLD-1-9			unit	unit
566202	5.52248e+06	PLD-2-1			injection	unit		enclave
566115	5.52182e+06	PLD-2-10	PLD-2-5	tonalite	injection	unit				yes
566147	5.52162e+06	PLD-2-11	PLD-2-6	diorite		unit				yes
566115	5.52144e+06	PLD-2-12				unit
566110	5.52248e+06	PLD-2-2	PLD-2-2	diorite		unit				yes
566091	5.52237e+06	PLD-2-3				unit
566014	5.52225e+06	PLD-2-4	PLD-2-3B	leucotonalite	injection	unit	unit	enclave		yes
566014	5.52225e+06	PLD-2-4	PLD-2-3C	diorite	injection	unit	unit	enclave			yes	55.3	0.44	21.88	9.41	0.39	4.28	3.46	0.055	1.79	1.73		0.15		0.18	0.32			99.39	4	769	12	6	71	49	2	40	40	167	60	8.659	22.09	14.33	2.76	0.86	2.56	0.172	0.194	0.12
566067	5.52216e+06	PLD-2-5				unit
564548	5.52464e+06	PLD-25-1			unit	unit		enclave
564782	5.52397e+06	PLD-25-10				unit
564799	5.52399e+06	PLD-25-11				unit
564970	5.52392e+06	PLD-25-12			unit	enclave
565035	5.524e+06	PLD-25-13			unit
564953	5.52397e+06	PLD-25-14				unit
565059	5.524e+06	PLD-25-15				unit
565098	5.524e+06	PLD-25-16			unit
565120	5.52398e+06	PLD-25-17			unit			enclave
565134	5.52392e+06	PLD-25-18			unit	unit		enclave
565169	5.52394e+06	PLD-25-19				unit		enclave
564583	5.52451e+06	PLD-25-2			unit
564422	5.52433e+06	PLD-25-3			unit
564337	5.52418e+06	PLD-25-4			unit
564522	5.52403e+06	PLD-25-5				unit	enclave
564562	5.52411e+06	PLD-25-6					unit
564590	5.52408e+06	PLD-25-7				unit
564644	5.52403e+06	PLD-25-8			unit
564731	5.52399e+06	PLD-25-9					unit
566099	5.52211e+06	PLD-2-6			injection	unit	unit
565224	5.52394e+06	PLD-26-1			unit
565093	5.52375e+06	PLD-26-10			unit	enclave
565104	5.52366e+06	PLD-26-11			unit	unit
564993	5.52354e+06	PLD-26-12				unit
565028	5.52351e+06	PLD-26-13				unit
564680	5.52319e+06	PLD-26-14				unit
564764	5.5232e+06	PLD-26-15					unit
564759	5.52332e+06	PLD-26-16						unit
564757	5.52344e+06	PLD-26-17				unit
564787	5.52348e+06	PLD-26-18				unit		enclave
564817	5.52355e+06	PLD-26-19			unit	unit		enclave
565240	5.52392e+06	PLD-26-2						unit
564758	5.52359e+06	PLD-26-20					unit
564730	5.52359e+06	PLD-26-21				unit	enclave
565272	5.5239e+06	PLD-26-3				unit
565290	5.52387e+06	PLD-26-4			unit			unit
565278	5.52385e+06	PLD-26-5			unit			unit
565252	5.52382e+06	PLD-26-6				unit		enclave
565200	5.5238e+06	PLD-26-7				unit
565245	5.52377e+06	PLD-26-8			unit			enclave
565203	5.52377e+06	PLD-26-9			unit	enclave		enclave
566102	5.52206e+06	PLD-2-7					unit
564952	5.52501e+06	PLD-27-1				unit
565141	5.52535e+06	PLD-27-10				unit
565186	5.52536e+06	PLD-27-11				unit
565208	5.5254e+06	PLD-27-12				unit
565249	5.52543e+06	PLD-27-13				unit
565273	5.52544e+06	PLD-27-14				unit
565299	5.52545e+06	PLD-27-15				unit
565325	5.52549e+06	PLD-27-16				unit
565465	5.52553e+06	PLD-27-17				unit
565544	5.5255e+06	PLD-27-18				unit
565597	5.5255e+06	PLD-27-19			unit
565010	5.52504e+06	PLD-27-2			unit	unit
565598	5.52557e+06	PLD-27-20				unit
565664	5.52561e+06	PLD-27-21				unit
565699	5.52563e+06	PLD-27-22				unit
565730	5.5256e+06	PLD-27-23				unit
565762	5.5256e+06	PLD-27-24				unit
565337	5.5258e+06	PLD-27-25			unit	unit		enclave
565305	5.52578e+06	PLD-27-26			unit	unit		enclave
565269	5.52566e+06	PLD-27-27			unit			unit
565796	5.52562e+06	PLD-27-28				unit
565827	5.52557e+06	PLD-27-29			unit	unit		enclave
565022	5.52514e+06	PLD-27-3			unit		unit
565748	5.52547e+06	PLD-27-30				unit		unit
565747	5.52542e+06	PLD-27-31			unit	unit		unit
564962	5.52518e+06	PLD-27-4				unit
564922	5.52519e+06	PLD-27-5				unit
565064	5.52526e+06	PLD-27-6				unit
565061	5.52535e+06	PLD-27-7				unit
565080	5.52537e+06	PLD-27-8				unit
565112	5.52536e+06	PLD-27-9				unit
566091	5.52201e+06	PLD-2-8					unit
565666	5.52533e+06	PLD-28-1			unit	enclave		enclave
565596	5.52524e+06	PLD-28-2			unit	enclave		enclave
565570	5.5251e+06	PLD-28-3			unit
565723	5.52519e+06	PLD-28-4			unit	enclave
565723	5.52525e+06	PLD-28-5			unit	enclave
565785	5.52527e+06	PLD-28-6			unit	enclave		enclave
565789	5.52517e+06	PLD-28-7				unit		enclave
566572	5.52533e+06	PLD-28-8			unit			enclave
566025	5.52194e+06	PLD-2-9			injection	unit
553914	5.52078e+06	PLD-29-5	PLD-29-5A	diorite		injection	unit	enclave		yes
554489	5.52257e+06	PLD-30-10						unit	enclave LDC in pluton
555193	5.52212e+06	PLD-30-2	PLD-30-2A			unit			LDC and pluton
555251	5.52214e+06	PLD-30-3	PLD-30-3	diorite				unit	LDC and pluton	yes	yes	52.19	1.15	15.84	8.58	0.26	2.93	2.14	0.13	5.44	7.04		0.32	0.89	0.07	0.4			97.38	4	594	20	8	74	74	10	45	37	110	267	20.69	52.47	32.05	5.784	1.75	4.7	0.45	0.565	0.165
555287	5.52207e+06	PLD-30-4							only LDC
555393	5.52272e+06	PLD-30-5			injection	injection		injection	LDC and pluton
555490	5.52281e+06	PLD-30-6	PLD-30-5A	diorite	injection	injection		injection	LDC and pluton	yes	yes	64.53	0.46	16.55	5.17	0.99	4.17	2.33	0.08	3.32	1.16		0.06		0.06	0.39			99.27	21	318	15	9	102	60	7	27	42	311	69	12.36	25.11	13.33	2.769	0.79	1.38	0.25	0.338	0.11
555587	5.52292e+06	PLD-30-7	PLD-30-6A	tonalite	injection	injection			LDC and pluton	yes
555725	5.52299e+06	PLD-30-8	PLD-30-7A	dyke	injection	injection			LDC and pluton	yes	yes	58.45	0.92	17.1	6.87	0.01	2.7	3.4	0.091	5.04	2.16		0.17	0.07	0.17	2.15			99.3	1	314	14	8	96	71	31	29	30	75	131
555789	5.52318e+06	PLD-30-9							only LDC
555908	5.52183e+06	PLD-30-I	PLD-30-1A		unit
555891	5.52187e+06	PLD-30-II						unit
555889	5.52191e+06	PLD-30-III	PLD-30-1C	diorite				unit		yes
555907	5.52197e+06	PLD-30-IV						unit	enclave LDC in pluton
555740	5.52186e+06	PLD-30-IX						unit
555863	5.522e+06	PLD-30-V				unit		enclave
555838	5.52201e+06	PLD-30-VI				unit		enclave
555803	5.52201e+06	PLD-30-VII						unit	enclave LDC in pluton
555748	5.52195e+06	PLD-30-VIII						unit	enclave LDC in pluton
555831	5.52183e+06	PLD-30-X						unit	enclave LDC in pluton
568481	5.52438e+06	PLD-3-1					unit	enclave
568365	5.52389e+06	PLD-3-10	PLD-3-7	leucotonalite	unit						yes	68.02	0.2	17.41	3.44	1.75	5.56	6.91	0.03	0.07	1.75		0.09		0.06	0.14			99.43	24	845	8	6	95	28	2	11	11	885	15
555494	5.52208e+06	PLD-31-1						injection	LDC and pluton
568389	5.52348e+06	PLD-3-11			unit
555770	5.5224e+06	PLD-31-10						unit	LDC and pluton
555712	5.52241e+06	PLD-31-11							only LDC
555719	5.52243e+06	PLD-31-12						unit
555811	5.52248e+06	PLD-31-13					unit
555856	5.52252e+06	PLD-31-14	PLD-31-6B	meladiorite				unit		yes	yes	58.34	0.9	17.23	7.49	0.74	3.34	4.34	0.103	5.11	1.23		0.3	0.04	0.07	0.33			99.56	12	398	7	13	166	77	45	86	70	231	117
555893	5.5226e+06	PLD-31-15				injection		unit	LDC and pluton
555689	5.52262e+06	PLD-31-16				injection		unit	LDC and pluton
555625	5.52253e+06	PLD-31-17				unit		unit	enclave LDC in pluton
555634	5.52242e+06	PLD-31-18							only LDC
555597	5.52241e+06	PLD-31-19						unit	LDC and pluton
555543	5.52206e+06	PLD-31-2				unit
568376	5.52339e+06	PLD-3-12			unit
555595	5.52207e+06	PLD-31-3				unit		unit	LDC and pluton
568376	5.52324e+06	PLD-3-13			unit
555693	5.52209e+06	PLD-31-4	PLD-31-3			unit		unit	LDC and pluton
568405	5.52318e+06	PLD-3-14				unit
555712	5.52211e+06	PLD-31-5						unit	LDC and pluton
568352	5.52294e+06	PLD-3-15				unit
555725	5.52215e+06	PLD-31-6	PLD-31-4	diorite				unit			yes	51.03	0.97	18.14	8.07	0.93	4.22	5.33	0.135	4.71	3.74		0.7	0.06	0.17	1.07			99.27	18	915	19	10	110	76	19	45	34	156	157
568341	5.52287e+06	PLD-3-16				unit
555753	5.52222e+06	PLD-31-7				unit		unit	LDC and pluton
568365	5.52278e+06	PLD-3-17				unit
555775	5.52229e+06	PLD-31-8	PLD-31-5	diorite				unit	LDC and pluton	yes	yes	56.88	0.56	18.96	8.18	0.49	2.9	4.7	0.088	4.51	0.88		0.04	0.02	0.07	1.06			99.34	9	347	9	6	68	55	22	74	72	177	110
568310	5.52256e+06	PLD-3-18				unit
555843	5.52233e+06	PLD-31-9							only LDC
568426	5.52437e+06	PLD-3-2					unit	enclave
555507	5.52245e+06	PLD-32-1						unit	LDC and pluton
552231	5.52264e+06	PLD-32-10					unit		enclave LDC in pluton
552172	5.52261e+06	PLD-32-11							only LDC
552120	5.52253e+06	PLD-32-12			injection	unit			enclave LDC in pluton
551863	5.52265e+06	PLD-32-13					injection		LDC and pluton
551924	5.52277e+06	PLD-32-14			injection			injection	LDC and pluton
552047	5.52276e+06	PLD-32-15	POD-32-7A	anorthosite	injection	unit		enclave	enclave LDC in pluton	yes	yes	44.16	0.03	27.78	15.17	0.17	1.75	2.76	0.055	1.33	1.18		0.02		0.07	3.19			98.21	15	318	6	1	10	52		93	26	221	14
552101	5.52269e+06	PLD-32-16			injection			injection	LDC and pluton
552167	5.52272e+06	PLD-32-17	POD-32-8		injection			injection	LDC and pluton
551424	5.52225e+06	PLD-32-18			injection		unit	enclave
550855	5.52341e+06	PLD-32-19			injection				LDC and pluton
555411	5.52233e+06	PLD-32-2						unit	enclave LDC in pluton
550977	5.52291e+06	PLD-32-20			injection		unit
552132	5.52145e+06	PLD-32-21				unit
552240	5.52139e+06	PLD-32-22	POD-32-10	tonalite		unit	unit	enclave		yes	yes	73.14	0.23	14.28	2.9	0.69	4.65	0.7	0.049	1.53	0.96		0.03		0.07	0.47			99.7	15	214	11	10	140	33	8	11	20	345	13
555461	5.52219e+06	PLD-32-3						unit	enclave LDC in pluton
556872	5.52255e+06	PLD-32-4			injection	injection			LDC and pluton
556789	5.52251e+06	PLD-32-5			injection	injection			LDC and pluton
556697	5.52266e+06	PLD-32-6	PLD-32-3C	leucotonalite		injection		injection	LDC and pluton	yes	yes	70.55	0.4	15.52	3.86	0.6	4.3	1.2	0.056	1.66	1.5		0.11		0.07	0.79			100.62	11	415	10	9	162	40	2	10	15	283	27
556697	5.52266e+06	PLD-32-6	PLD-32-3B			injection		injection	LDC and pluton
553296	5.52293e+06	PLD-32-7	POD-32-4			injection	unit
552244	5.52272e+06	PLD-32-9						unit	enclave LDC in pluton
568428	5.52433e+06	PLD-3-3					unit	enclave
568421	5.52429e+06	PLD-3-4	PLD-3-2	diorite		unit	unit			yes
568426	5.52425e+06	PLD-3-5			injection	unit	unit
568434	5.52416e+06	PLD-3-6				unit	unit	enclave
568426	5.52412e+06	PLD-3-7					unit	enclave
568421	5.52408e+06	PLD-3-8				unit
568408	5.52404e+06	PLD-3-9	PLD-3-6	diorite	injection	unit	enclave			yes
565803	5.52037e+06	PLD-4-1				unit		enclave	enclave LDC in pluton
565845	5.52085e+06	PLD-4-10	PLD-4-6A	diorite		unit				yes
565753	5.52035e+06	PLD-4-2				unit
565694	5.52029e+06	PLD-4-3				unit
565615	5.52033e+06	PLD-4-4				unit
565626	5.52029e+06	PLD-4-5				unit
565713	5.52093e+06	PLD-4-6			unit	unit		enclave
565837	5.521e+06	PLD-4-7				unit		enclave
565885	5.52111e+06	PLD-4-8			unit			unit
565906	5.52106e+06	PLD-4-9	PLD-4-4A	tonalite	unit	unit				yes
569496	5.5241e+06	PLD-5-1	PLD-5-1E	leucotonalite		unit			enclave LDC in pluton	yes	yes	75.88	0.01	13.89	1.55	3.08	4.48	0.01	0.015	0.07	0.55				0.08	0.05			99.67	37	256	6	5	44	4		6	11	959	4	5.22	10.13	2.889	0.611	0.35		0.05	0.097
569496	5.5241e+06	PLD-5-1	PLD-5-1A	anorthosite		unit			enclave LDC in pluton	yes
569573	5.52414e+06	PLD-5-2	PLD-5-2	tonalite		unit				yes	yes	67.22	0.23	17.06	3.95	1.33	4.78	1.32	0.065	1.19	1.54		0.05		0.14	0.59			99.47	27	441	10	7	117	42	2	12	15	448	31
570163	5.52407e+06	PLD-5-3					unit
570099	5.52374e+06	PLD-5-4					unit
570054	5.52363e+06	PLD-5-5	PLD-5-4B	tonalite			unit			yes
569983	5.52342e+06	PLD-5-6					unit
569933	5.5233e+06	PLD-5-7					unit
569557	5.52371e+06	PLD-5-8					unit
569480	5.52402e+06	PLD-5-9				unit		enclave
566413	5.52432e+06	PLD-6-1	PLD-6-1	diorite	unit			unit	enclave LDC in pluton	yes
566439	5.52417e+06	PLD-6-2			unit			enclave	enclave LDC in pluton
566474	5.52412e+06	PLD-6-3			unit
566495	5.52358e+06	PLD-6-4			unit			enclave
566341	5.52344e+06	PLD-6-5	PLD-6-3	leucotonalite	unit					yes	yes	66.88	0.24	17.21	4.18	0.86	6.87	0.99	0.03	0.86	1.12		0.06		0.06	0.39			99.75	15	685	7	6	83	31	2	14	21	485	21
566212	5.52381e+06	PLD-6-6			unit
569530	5.52272e+06	PLD-7-1							only LDC
568927	5.52163e+06	PLD-7-10							LDC and pluton
568538	5.52097e+06	PLD-7-11				injection			LDC and pluton
569408	5.52262e+06	PLD-7-2			injection				LDC and pluton
569387	5.52255e+06	PLD-7-3			unit
569189	5.52256e+06	PLD-7-4			injection				LDC and pluton
569099	5.52236e+06	PLD-7-5			unit
569091	5.5222e+06	PLD-7-6			injection		injection		LDC and pluton
569062	5.52213e+06	PLD-7-7				unit
568998	5.52201e+06	PLD-7-8							only LDC
569004	5.52192e+06	PLD-7-9				unit
566438	5.52249e+06	PLR-1-1				unit
566448	5.52284e+06	PLR-1-10			unit			enclave
566415	5.52293e+06	PLR-1-11	PLR-1-6		unit		unit
566740	5.52311e+06	PLR-1-12			unit	enclave
566807	5.52339e+06	PLR-1-13			unit		enclave
566878	5.52339e+06	PLR-1-14			unit		enclave	enclave
566913	5.52343e+06	PLR-1-15			unit				enclave LDC in pluton
566903	5.52352e+06	PLR-1-16			unit		enclave
567053	5.52371e+06	PLR-1-17			unit
567100	5.52379e+06	PLR-1-18			unit
567132	5.52385e+06	PLR-1-19			unit		enclave
566369	5.52251e+06	PLR-1-2			injection	unit
567149	5.52389e+06	PLR-1-20			unit		enclave	enclave
567069	5.5235e+06	PLR-1-21			unit
567016	5.52337e+06	PLR-1-22			unit
566947	5.52328e+06	PLR-1-23			unit
566589	5.52266e+06	PLR-1-24				unit
566542	5.5226e+06	PLR-1-25				unit
566520	5.52255e+06	PLR-1-26				unit
566343	5.52255e+06	PLR-1-3			injection	unit
566343	5.52261e+06	PLR-1-4			injection	unit
566425	5.52261e+06	PLR-1-5				unit
566485	5.52271e+06	PLR-1-6			unit
566388	5.52277e+06	PLR-1-7			unit	enclave
566405	5.5228e+06	PLR-1-8						unit
566367	5.5228e+06	PLR-1-9	PLR-1-5		unit			enclave
567778	5.52275e+06	PLR-2-1				unit
567714	5.52318e+06	PLR-2-10				unit
567709	5.52333e+06	PLR-2-11				unit
567714	5.52338e+06	PLR-2-12	PLR-2-7	leucotonalite	unit	unit					yes	70.62	0.04	17.83	2.99	2.05	5.86	0.26	0.013	0.07	0.49				0.09	0.1			100.41	20	703	5	5	58	6	1	8	14	1207	6
567706	5.52405e+06	PLR-2-13			unit		enclave
567624	5.52412e+06	PLR-2-14			unit		enclave
567601	5.52424e+06	PLR-2-15					unit
567770	5.52279e+06	PLR-2-2	PLR-2-2	tonalite		unit					yes	66.62	0.25	16.98	4.21	1.52	4.61	1.77	0.057	1.33	1.58		0.13		0.07	0.39			99.52	32	553	11	7	102	46	1	21	24	547	35
567754	5.52283e+06	PLR-2-3				unit
559595	5.51866e+06	PLR-23-1			unit				enclave LDC in pluton
560733	5.52029e+06	PLR-23-10	PLR-23-8A		unit
561558	5.5204e+06	PLR-23-11	PLR-23-9		unit
561902	5.52037e+06	PLR-23-12			unit
562134	5.52081e+06	PLR-23-13			unit
562162	5.52091e+06	PLR-23-14			unit
559336	5.51866e+06	PLR-23-15			unit		enclave
559179	5.51852e+06	PLR-23-16			unit		enclave
560143	5.519e+06	PLR-23-2			unit
560284	5.51926e+06	PLR-23-3			unit		enclave
560366	5.5195e+06	PLR-23-4			unit
560512	5.51985e+06	PLR-23-5			unit
560674	5.51984e+06	PLR-23-6
560687	5.51977e+06	PLR-23-7					unit
560945	5.52034e+06	PLR-23-8
561120	5.52003e+06	PLR-23-9			unit
567746	5.52288e+06	PLR-2-4				unit
561753	5.52031e+06	PLR-24-1			unit
561262	5.51901e+06	PLR-24-10			unit
561221	5.51907e+06	PLR-24-11			unit	enclave
561192	5.51913e+06	PLR-24-12			unit
561102	5.51923e+06	PLR-24-13			unit
561032	5.51939e+06	PLR-24-14	PLR-24-5A		unit
561753	5.52025e+06	PLR-24-2			unit
561753	5.52014e+06	PLR-24-3			unit
561560	5.51991e+06	PLR-24-4	PLR-24-1		unit		unit
561556	5.51916e+06	PLR-24-5	PLR-24-2		unit
561556	5.51909e+06	PLR-24-6			unit
561556	5.51902e+06	PLR-24-7			unit
561560	5.51894e+06	PLR-24-8			unit
561597	5.51876e+06	PLR-24-9			unit
567873	5.52296e+06	PLR-2-5				unit
568429	5.52561e+06	PLR-25-1					unit
568755	5.52447e+06	PLR-25-10					unit
568686	5.5245e+06	PLR-25-11					unit
568649	5.52444e+06	PLR-25-12				unit
568587	5.5243e+06	PLR-25-13					unit
568513	5.52433e+06	PLR-25-14					unit
568506	5.52437e+06	PLR-25-15					unit	enclave
568360	5.52444e+06	PLR-25-16					unit
568141	5.52477e+06	PLR-25-17					unit
567966	5.52428e+06	PLR-25-18					unit
567847	5.52427e+06	PLR-25-19					unit
568815	5.52575e+06	PLR-25-2						unit
567654	5.52427e+06	PLR-25-20				unit
569125	5.52569e+06	PLR-25-3						unit
569227	5.5257e+06	PLR-25-4						unit
569257	5.52565e+06	PLR-25-5						unit
569331	5.52548e+06	PLR-25-6				unit
569268	5.52466e+06	PLR-25-7			unit			enclave
569723	5.5248e+06	PLR-25-8				unit
568768	5.52437e+06	PLR-25-9					unit
567852	5.5231e+06	PLR-2-6			injection	unit
567799	5.5231e+06	PLR-2-7				unit
567717	5.52305e+06	PLR-2-8				unit
564277	5.52272e+06	PLR-28-1			unit
565815	5.52352e+06	PLR-28-10				unit
565705	5.52389e+06	PLR-28-11				unit
565619	5.52381e+06	PLR-28-12			unit	unit
565461	5.52366e+06	PLR-28-13				unit
565530	5.52387e+06	PLR-28-14			unit			enclave
565588	5.52398e+06	PLR-28-15				unit
565656	5.5241e+06	PLR-28-16			unit	enclave
565724	5.52399e+06	PLR-28-17				unit
563728	5.52185e+06	PLR-28-2			unit
564657	5.52256e+06	PLR-28-3			unit
564585	5.52278e+06	PLR-28-4			unit
564442	5.52279e+06	PLR-28-5			unit			enclave
564825	5.52241e+06	PLR-28-6			unit
565252	5.52285e+06	PLR-28-7			unit
565480	5.52283e+06	PLR-28-8			unit
565649	5.52327e+06	PLR-28-9				unit		enclave
567717	5.52312e+06	PLR-2-9				unit
565018	5.52534e+06	PLR-29-1				unit
564114	5.5253e+06	PLR-29-11						unit	LDC and pluton
564006	5.52484e+06	PLR-29-12			unit			unit
563974	5.52481e+06	PLR-29-13			unit	unit
563942	5.5248e+06	PLR-29-14				unit
563903	5.52479e+06	PLR-29-15				unit
563870	5.52472e+06	PLR-29-16				unit
563774	5.52456e+06	PLR-29-17				unit	enclave
563704	5.5245e+06	PLR-29-18			unit	unit
563711	5.52445e+06	PLR-29-19				unit	enclave
565050	5.52544e+06	PLR-29-2				unit
563684	5.52436e+06	PLR-29-20			unit	enclave
563551	5.52428e+06	PLR-29-21					unit
563424	5.5243e+06	PLR-29-22				unit
563283	5.52437e+06	PLR-29-23						unit
563220	5.52436e+06	PLR-29-24			unit	unit
563095	5.52437e+06	PLR-29-25				unit
565045	5.52549e+06	PLR-29-3				unit
565093	5.52556e+06	PLR-29-4				unit
565078	5.52559e+06	PLR-29-5				unit		unit
557111	5.52126e+06	PLR-30-1				unit			LDC and pluton
556820	5.52131e+06	PLR-30-10				unit		unit	LDC and pluton
556760	5.52122e+06	PLR-30-11				unit		unit
556697	5.52125e+06	PLR-30-12							only LDC
556659	5.52124e+06	PLR-30-13						unit
556658	5.52129e+06	PLR-30-14					unit
556612	5.52126e+06	PLR-30-15	PLR-30-13A				unit	unit	enclave LDC in pluton
556610	5.52122e+06	PLR-30-16							only LDC
556590	5.52116e+06	PLR-30-17				unit
556548	5.52117e+06	PLR-30-18						unit	enclave LDC in pluton
556512	5.52118e+06	PLR-30-19				injection		unit	enclave LDC in pluton
557082	5.52128e+06	PLR-30-2				unit
556515	5.52111e+06	PLR-30-20						unit	enclave LDC in pluton
556685	5.52104e+06	PLR-30-21				unit		unit
556759	5.52099e+06	PLR-30-22			unit	unit
556872	5.52106e+06	PLR-30-23						unit
557093	5.5211e+06	PLR-30-24				unit		enclave	enclave LDC in pluton
557091	5.52115e+06	PLR-30-25	PLR-30-20A				unit		LDC and pluton
557203	5.52123e+06	PLR-30-26				unit			LDC and pluton
556434	5.52113e+06	PLR-30-27						unit	enclave LDC in pluton
556424	5.52123e+06	PLR-30-28						unit
556391	5.52129e+06	PLR-30-29	PLR-30-22					unit	enclave LDC in pluton
557064	5.52134e+06	PLR-30-3				unit			LDC and pluton
556325	5.5213e+06	PLR-30-30							only LDC
556297	5.52125e+06	PLR-30-31						unit	enclave LDC in pluton
556237	5.52119e+06	PLR-30-32						unit	enclave LDC in pluton
556223	5.52125e+06	PLR-30-33				injection			LDC and pluton
556159	5.5213e+06	PLR-30-34							only LDC
557020	5.52135e+06	PLR-30-4				unit			LDC and pluton
556958	5.52137e+06	PLR-30-5							only LDC
556920	5.52141e+06	PLR-30-6						unit
556871	5.52143e+06	PLR-30-7				unit		unit
556847	5.52142e+06	PLR-30-8						unit
556824	5.52138e+06	PLR-30-9						unit
564476	5.52188e+06	PLR-3-1			unit		enclave
556051	5.5213e+06	PLR-31-1				injection			LDC and pluton
556287	5.52108e+06	PLR-31-10						unit	enclave LDC in pluton
556409	5.5211e+06	PLR-31-11						unit	enclave LDC in pluton
556462	5.52103e+06	PLR-31-12				unit	unit
555570	5.52137e+06	PLR-31-13						unit	enclave LDC in pluton
555559	5.52135e+06	PLR-31-14						unit
555539	5.52131e+06	PLR-31-15					unit
555548	5.52127e+06	PLR-31-16				unit		unit
555575	5.5212e+06	PLR-31-17				injection		unit	LDC and pluton
555590	5.52117e+06	PLR-31-18						unit
555636	5.52112e+06	PLR-31-19						unit	LDC and pluton
556049	5.52125e+06	PLR-31-2							only LDC
555686	5.5211e+06	PLR-31-20					unit		LDC and pluton
555780	5.52108e+06	PLR-31-21						unit	LDC and pluton
555827	5.52111e+06	PLR-31-22						unit
555894	5.52119e+06	PLR-31-23							only LDC
555885	5.52127e+06	PLR-31-24						unit	enclave LDC in pluton
555831	5.52128e+06	PLR-31-25				unit			LDC and pluton
555830	5.52136e+06	PLR-31-26						unit
555777	5.52139e+06	PLR-31-27					unit		enclave LDC in pluton
555762	5.52133e+06	PLR-31-28					unit		enclave LDC in pluton
555715	5.52134e+06	PLR-31-29					unit		enclave LDC in pluton
[truncated: 607 more rows]
[truncated: 11 more columns]

## Sheet: S2
	Legend - "Stations" sheet
		Fields	Definition
		UTME83	Easting (UTM coordinate)
		UTMN83	Northing (UTM coordinate)
		Station_nb	Outcrop designation
		Sampl_nb	Designation of samples collected from a given outcrop
		Sample_name	Analysed sample
		Outcrop_leucotonalite	morphology of the leucotonalite phase (unit*, enclave*, injection*)		*unit = massive unit, that may contain enclaves and/or that can be intersected by injections
		Outcrop_tonalite	morphology of the tonalite phase (unit, enclave, injection)		*enclave = phase observed as an enclave inside another phase
		Outcrop_diorite	morphology of the diorite phase (unit, enclave, injection)		*injection = injection with an irregular outline or dyke
		Outcrop_meladiorite	morphology of the meladiorite phase (unit, enclave, injection)
		Outcrop_other	rocks hosting the Chibougamau pluton (LDC or volcanic rocks)
		Thin section found	available thin sections
		Pulpe available	powder available for re-analysis
		SiO2 (wt%)	Major elements, in weight percent
		TiO2	(chemical analyses performed in the 80s on behalf of the MERN)
		Al2O3	(method = fluorescence X)
		CaO
		K2O
		Na2O
		MgO
		MnO
		FeO
		Fe2O3
		Fe2O3T
		P2O5
		S (wt%)
		CO2
		H2O total
		H2O_MOINS
		H2O_PLUS
		TOTAL
		Rb (ppm)	Trace elements, in ppm
		Sr
		Y
		Nb
		Zr
		Zn
		Cu
		Ni
		Cr
		Ba
		V
		La	Trace elements, in ppm
		Ce	(chemical analyses performed in the 80s on behalf of the MERN)
		Nd	(method = neutronic activation)
		Sm
		Eu
		Gd
		Tb
		Ho
		Tm
		Yb
		Lu
		Sc
		Cr_ActNeu
		Hf
		Ta
		Th
		U
		Sb
		Co
		Na2O_ActNeu
