# Supplementary material
Source: MDPI journal article supplement (https://www.mdpi.com/2075-163X/9/3/174)
Supplement: s1 [file s1 › Supplemental-material_S6-8.xlsx]

## Sheet: S6
Reference	UTME83	UTMN83	Outcrop_number	Samples_numbers	Sample_analysed	Name_sample	SiO2 (wt%)	TiO2	Al2O3	CaO	K2O	Na2O	Na2O_neutronic-activation	MgO	FeO	Fe2O3	Fe2O3T	MnO	P2O5	S (%)	CO2	H2O_Total	H2O_MINUS	H2O_PLUS	LOI	TOTAL	Rb (ppm)	Sr	Y	Nb	Zr	Zn	Cu	Ni	Cr	Cr_neutronic-activation	Ba	V	Sc	Hf	Ta	Th	U	Sb	Co	La	Ce	Pr	Nd
Analysed by D. Racicot (1980-1981)	528342	5.51678e+06	5A-15R-6	5A-15R-4	5A-15R-4	meladiorite	46.42	1.56	14.9	10.05	0.54	0.92	1.617	9.33	8.49	4.06	13.4949	0.175	0.23	0.19	0.07	2.39		2.39		99.33	15	518	15	7	55	135	39	298	293	224.9	69	228	20.81	1.33	0.15	0.69	0.109	0.077	59.89	11.79	29.33		16.97
Analysed by D. Racicot (1980-1981)	533246	5.51722e+06	5A-16R-10	5A-16R-4	5A-16R-4	meladiorite	46.8	1.14	17.36	11.59	0.36	2.67		7.45	5.71	3.92	10.2655	0.145	0.51	0.32	0.05	1.29		1.29		99.32	5	633	16	10	65	89	41	117	164		137	217
Reanalysed by L. Mathieu (2018)	533407	5.51778e+06	5A-16R-2	5A-16R-1B	5A-16R-1B	leucotonalite	78	0.05	13.4	0.41	4.21	4.43		0.16			0.58	0.02	0.03	0.01	0.073288				0.17	101.48	70.1	30.4	12.1	28.8	33	11	2	-1	-10		213	-5	2	2.1	3.2	3.38	5.17	-0.05	-1	4.6	11.5	1.26	4.4
Analysed by D. Racicot (1980-1981)	533407	5.51778e+06	5A-16R-2	5A-16R-1AB	5A-16R-1B	leucotonalite	76.38	0.01	13.3	0.47	4.15	5.1		0.01	0.27	0.36	0.660051	0.045			0.05	0.05		0.05		100.2	65	20	16	21	38	10	1	6	15		343
Analysed by D. Racicot (1980-1981)	533413	5.5177e+06	5A-16R-3	5A-16R-2A-F	5A-16R-2C	leucotonalite	75.95	0.15	13.75	2.18	0.46	5.63	5.866	0.37	0.46	0.99	1.5012	0.024		0.02	0.06	0.11		0.11		100.15	8	161	9	9	142	7	6	8	11	4.42	460	1	0.994	3.71	0.17	12.75	0.733	0.002	1.674	74.85	133.5		42.6
Reanalysed by L. Mathieu (2018)	534699	5.51607e+06	5A-21D-6	5A-21D-4	5A-21D-4D	meladiorite	48.3	1.43	16.35	9.74	0.72	3.09		6.81			13.2	0.21	0.4	0.09	0.146576				1.46	101.78	16.5	398	17.1	10.7	64	97	157	69	40		158	285	26	1.9	0.3	0.57	0.23	-0.05	34	34.1	74.2	9.32	37.6
Analysed by D. Racicot (1980-1981)	534699	5.51607e+06	5A-21D-6	5A-21D-4	5A-21D-4I	dyke	64.1	0.42	17.3	5.2	0.94	3.86	4.07	1.94	2.88	1.72	4.92054	0.06	0.87	0.03	0.07		0.04	1.14		100.831	30	267	13	8	156	57	9	25	25	21.31	275	61	8.35	3.18	0.296	2.09	0.515		13.8	14.68	26.58		13.49
Analysed by D. Racicot (1980-1981)	534699	5.51607e+06	5A-21D-6	5A-21D-4	5A-21D-4D	meladiorite	48.09	1.43	16.05	9.8	0.72	2.85	3.093	6.89	8.1	3.91	12.9115	0.22	0.42	0.06	0.11	1.17		1.17		99.82	15	377	20	13	90	99	103	65	53		146	266	25.25	1.82	0.35	0.26	0.138	0.001	27.5	20.94	49.27		29.57
Analysed by D. Racicot (1980-1981)	534699	5.51607e+06	5A-21D-6	5A-21D-4	5A-21D-4E	diorite	60.69	0.63	17.48	6.74	0.44	3.85		4	3.92	2.01	6.3663	0.092	0.15		0.07	0.23		0.23		99.3	8	234	16	9	159	65	18	30	48		153	93
Analysed by D. Racicot (1980-1981)	534699	5.51607e+06	5A-21D-6	5A-21D-4	5A-21D-4J	dyke	56.4	0.7	17.9	7.64	0.55	3.44		4.16	4.76	1.69	6.97979	0.1	0.22	0.06	0.05		0.01	1.2		99.3098	11	370	14	10	143	70	23	76	90		211	100
Analysed by D. Racicot (1980-1981)	534699	5.51607e+06	5A-21D-6	5A-21D-4	5A-21D-4B	meladiorite	46.86	2.07	17.5	9.15	0.41	3.59		4.92	8.56	4.11	13.6227	0.28	1.25	0.07	0.1	0.83		0.83		99.7	7	465	40	22	131	124	42	10	18		91	121
Analysed by D. Racicot (1980-1981)	534227	5.51642e+06	5A-27D-19	5A-27D-5	5A-27D-5B	meladiorite	52.74	0.7	17.88	9.37	0.88	2.51	2.833	6.71	5.44	1.65	7.69547	0.14	0.12		0.06	1.11		1.11		99.31	19	263	14	8	87	86	13	118	164	117.1	165	155	19.77	1.822	0.44	0.61	0.135		31.19	9.607	20.96		11.95
Analysed by D. Racicot (1980-1981)	534227	5.51642e+06	5A-27D-19	5A-27D-5	5A-27D-5A	meladiorite	54.15	0.5	17.88	9.23	0.88	2.7		6.61	4.51	1.18	6.19196	0.12	0.37	0.62	0.12	0.71		0.71		99.58	21	302	12	7	77	65	9	102	130		192	111
Analysed by D. Racicot (1980-1981)	535427	5.51677e+06	5A-27D-4	5A-27D-3	5A-27D-3	dyke	60	0.6	16.9	5.89	0.33	3.57		2.55	3.78	2.84	7.04071	0.09	0.08	0.03	0.05		-0.01	2.3		99.3307	7	259	13	5	103	54	9	30	41		160	99
Analysed by D. Racicot (1980-1981)	531132	5.51721e+06	5A-32D-4	5A-32D-2	5A-32D-2A	diorite	64.37	0.6	16.55	4.85	1.14	3.41		2.07	2.65	2.2	5.14494	0.077	0.16	0.02	0.24	1.2		1.2		99.54	24	358	13	9	147	67	15	21	27		371	65
Analysed by D. Racicot (1980-1981)	534237	5.516e+06	5A-32R-3	5A-32R-2ABC	5A-32R-2C	meladiorite	64.65	0.45	17.33	5.47	0.72	4.13		2.19	2.99	1.21	4.53279	0.07	0.08		0.06	0.23		0.23		99.58	16	268	12	10	139	64	20	28	33		186	59
Analysed by D. Racicot (1980-1981)	534397	5.51309e+06	5A-70D-1	5A-70D-1	5A-70D-1	tonalite	68.7	0.25	17.3	3.18	1.54	6.2		0.82	0.25	1.41	1.68782	0.02	0.08	0.04	0.09		0.09	0.91		100.888	27	718	7	2	71	15	1	12	15		856	16
Analysed by D. Racicot (1980-1981)	520809	5.51948e+06	5G-28R-5	5G-28R-5ABC	5G-28R-5A	dyke	63.19	0.76	16.34	5.65	0.85	3.68		2.4	3.45	1.66	5.49399	0.085	0.28		0.05	1.17		1.17		99.57	21	346	22	13	152				30		248	56
Analysed by D. Racicot (1980-1981)	522163	5.519e+06	5G-35D-2	5G-35D-2	5G-35D-2B	dyke	56.54	1.25	15.93	7.54	0.64	3.53	3.81	4.12	5.57	3.37	9.55994	0.129	0.34	0.12	0.07	0.47		0.47		99.62	15	358	23	13	168	84	68	48	41	27.7	234	170	20.23	3.76	0.389	2.08	0.493		26.75	27.62	60.16		33.74
Analysed by D. Racicot (1980-1981)	532350	5.52072e+06	5H-18D-18	5H-18D-8	5H-18D-8B	meladiorite	48.26	1.41	15.65	8.95	0.33	2.33		7.03	8.56	2.11	11.6227	0.155	0.32	0.1	1.4	3.01		3.01		99.62	5	493	21	9	87	95	38	131	176		121	221
Analysed by D. Racicot (1980-1981)	528779	5.51824e+06	5H-19R-17	5H-19R-14AB	5H-19R-14C	dyke	56.3	0.45	14.2	7.13	0.77	3.47		6.87	4.56	2.21	7.27753	0.16	0.18	0.1	0.38		-0.01	2.28		99.3975	23	331	12	7	91	154	94	124	404		370	106
Analysed by D. Racicot (1980-1981)	527159	5.52062e+06	5H-25D-16	5H-25D-9	5H-25D-9	leucotonalite	75.29	0.16	13.7	1.58	1.87	5.09		0.25	0.33	0.99	1.35673	0.024	0.01		1.03	0.2		0.2		100.52	50	140	11	12	91	10	5	8	17		468	9
Analysed by D. Racicot (1980-1981)	527948	5.52075e+06	5H-26D-23	5H-26D-11	5H-26D-11	tonalite	69.74	0.32	14.81	2.94	1.01	4.37	4.543	1.12	1.92	0.65	2.7837	0.038	0.29	0.54	1.77	1		1		100.52	26	259	10	8	125	44	3	15	21		359	29	3.763	3.42	0.24		0.446	0.014	6.166	19.09	33.63		11.92
Analysed by D. Racicot (1980-1981)	527637	5.52121e+06	5H-26D-6	5H-26D-6	5H-26D-6	tonalite	73.48	0.19	14.37	2.27	1.52	4.55	4.568	0.64	1	0.96	2.0713	0.037	0.02		0.54	0.36		0.36		99.94	39	263	11	13	130	22	2	9	13	2.55	661	11	2.222	3.03	0.39	4.56	0.521	0.05	3.058	23.37	41.85		13.64
Reanalysed by L. Mathieu (2018)	531778	5.5198e+06	5H-27R-5	5H-27R-4	5H-27R-4	diorite	57.6	0.61	17.3	7.37	0.66	3.19		4.06			7.91	0.11	0.11	0.02	0.476372				2.46	101.44	15.9	251	12.9	5.4	79	64	9	66	50		187.5	122	17	2.4	0.3	1.7	0.29	-0.05	23	10.7	25.3	3.33	12.8
Analysed by D. Racicot (1980-1981)	531778	5.5198e+06	5H-27R-5	5H-27R-4	5H-27R-4	diorite	57	0.65	17.25	7.48	0.65	3.03	3.302	4.1	4.91	1.89	7.34648	0.122	0.08	0.01	0.44	1.7		1.7		99.31	16	244	16	9	80				54	28.25	224	124	16.65	2.07	0.29	1.4	0.295	0.001	22.53	12.36	26.3		13.08
Analysed by D. Racicot (1980-1981)	531622	5.51952e+06	5H-32D-22	5H-32D-9	5H-32D-9	tonalite	74.49	0.32	13.53	2.27	1.27	4.65		0.55	1.19	1.41	2.73245	0.04	0.01		0.16	0.3		0.3		100.19	16	236	13	17	220	15	1	6	12		503	3
Analysed by D. Racicot (1980-1981)	528517	5.5182e+06	5H-33D-9	5H-33D-4	5H-33D-4D	tonalite	68.68	0.96	14.73	3.88	0.65	4.71		1.37	2.39	2.12	4.77601	0.081	0.15		0.04	0.18		0.18		99.94	13	336	26	15	353	60	7	7	19		407	31
Analysed by D. Racicot (1980-1981)	558063	5.51309e+06	6B-52D-5	6B-52D-2	6B-52D-2	dyke	46.9	1.07	17.7	7.75	0.03	0.62		7.42	8.95	2.74	12.6861	0.16	0.25	0.07	0.15		0.03	5.4		100.076	1	215	17	11	88	94	29	73	77		32	194
Analysed by D. Racicot (1980-1981)	558866	5.51366e+06	6B-52D-9	6B-52D-4	6B-52D-4	dyke	62	0.4	16.7	5.31	0.07	4.22		2.71	2.55377	1.892	4.73	0.05	0.11	0.51	0.58		-0.01	2.16		99.49	22	197	16	9	102	39	41	37	41		325	58
Analysed by D. Racicot (1980-1981)	558828	5.51296e+06	6B-53D-5	6B-53D-3	6B-53D-3	dyke	51.1	0.75	17.1	8.59	0.02	0.59		7.12	6.23594	2.97	9.9	0.1	0.26	0.82	0.09		0.03	4.32		100.69		254	16	9	84	73	104	92	125		45	171
Analysed by D. Racicot (1980-1981)	556988	5.5148e+06	6B-63D-2	6B-63D-1A-C	6B-63D-1A	leucotonalite	75	0.17	14.4	2.28	1.7	4.5		0.47	0.64	1.01	1.72123	0.02	0.03	0.02	0.05		0.08	1.1		101.521	41	215	8	5	121	24	3	7	7		787	5
Analysed by D. Racicot (1980-1981)	554639	5.51175e+06	6B-75D-5	6B-75D-2	6B-75D-2E	dyke	69.1	0.27	16.3	2.9	1.45	5.02	4.92	1.53	0.92	1.32	2.3424	0.03	0.08	0.02	0.07		0.08	1.02		100.182	33	240	8	6	91	11	3	14	22	14.43	420	26	2.93	2.1	0.195	3.42	0.917		6.15	17.61	31.23		11.46
Analysed by D. Racicot (1980-1981)	554639	5.51175e+06	6B-75D-5	6B-75D-2	6B-75D-2C	dyke	59.3	0.41	18.1	4.99	2.88	3.63		3.76	1.96	2.33	4.50815	0.06	0.16	0.02	-0.01		0.04	2.24		100.028	70	343	11	5	81	37	5	86	155		912	68
Analysed by D. Racicot (1980-1981)	554776	5.51186e+06	6B-75D-6	6B-75D-3	6B-75D-3C	dyke	53.4	0.4	17.6	5.5	2.19	2.66		7.54	4.48	2.09	7.06862	0.15	0.1	0.02	0.91		0.03	3.84		101.259	54	148	12	4	49	96	15	114	446		600	108
Analysed by D. Racicot (1980-1981)	554776	5.51186e+06	6B-75D-6	6B-75D-3	6B-75D-3A	tonalite	72.3	0.17	15.1	2.18	3.04	4.6		0.76	0.66	0.99	1.72346	0.03	0.06	0.02	0.19		0.08	0.98		101.203	47	284	10	7	68	16	2	11	16		720	15
Analysed by D. Racicot (1980-1981)	550787	5.51549e+06	6C-15D-10	6C-15D-4A-E	6C-15D-4B	dyke	60.6	0.4	18.6	5.71	1.55	4.01	4.28	2.82	1.82	2.92	4.94257	0.08	0.15	0.05	0.12		-0.01	1.78		100.723	37	524	11	6	85	57	26	23	37	31.86	558	73	6.86	1.98	0.146	2.27	0.717	0.05	15.4	17.66	33.42		16.05
Analysed by D. Racicot (1980-1981)	552919	5.51651e+06	6C-15D-12	6C-15D-5	6C-15D-5	tonalite	69.89	0.27	15.95	3.67	1.38	4.58	4.583	1.07	1.39	1.23	2.77471	0.06	0.07		0.06	0.27		0.27		99.89	50	398	11	7	111	47	5	11	20	5.26	419	29	4.016	2.77	0.18	1.42	0.388	0.042	6.439	11.97	22.63		8.606
Analysed by D. Racicot (1980-1981)	545545	5.51763e+06	6C-30R-25	6C-30R-13AB	6C-30R-13A	leucotonalite	71.06	0.3	15.65	3.37	0.92	4.59		1.06	1.59	1.21	2.97697	0.05	0.15		0.08	0.65		0.65		100.68	28	398	10	8	103	34	7	10	33		372	30
Analysed by D. Racicot (1980-1981)	553303	5.51798e+06	6C-77D-15	6C-77D-3A	6C-77D-3A	tonalite	67.2	0.35	16.4	4.21	1.4	5		1.43	1.2	1.53	2.86356	0.04	0.09	0.03	0.52		0.08	1.12		100.694	28	409	10	7	110	33	5	13	13		431	29
Analysed by D. Racicot (1980-1981)	545734	5.51274e+06	6C-8D-14	6C-8D-6	6C-8D-6	meladiorite	55.42	0.62	20.19	7.91	0.66	4.17	4.498	3.4	3.98	1.64	6.06297	0.092	0.11	0.08	0.61	0.45		0.45		99.33	14	500	14	6	86	62	31	39	37	20.86	198	108	12.96	2.11	0.12	0.59	0.159	0.0005	21.96	9.689	21.79		14.46
Analysed by D. Racicot (1980-1981)	551996	5.51503e+06	6C-8R-20	6C-8R-10	6C-8R-10	tonalite	70.11	0.27	15.65	2	1.2	6.17		1.21	1.53	1.04	2.74029	0.061	0.15		0.04	0.71		0.71		100.14	25	471	12	8	149	34	5	8	14		372	12
Analysed by D. Racicot (1980-1981)	543825	5.5159e+06	6D-39D-10	6D-39D-7	6D-39D-7	dyke	57.5	0.36	17.2	6.84	0.16	4.28	4.57	5.8	3.01	2.7	6.04501	0.09	0.09	0.02	0.05		0.01	2.1		100.455	43	280	12	4	55	56	5	75	278	34	462	94	14.2	1.4	0.124	1.4	0.462		20.4	11.21	22.32		11.34
Analysed by D. Racicot (1980-1981)	543844	5.51588e+06	6D-39D-11	6D-39D-8	6F-39D-8A	diorite	60.68	0.8	16.77	5.9	0.89	3.68		3.23	4.31	1.9	6.6897	0.101	0.32		0.1	0.73		0.73		99.41	26	369	15	11	143	79	40	40	68		213	101
Analysed by D. Racicot (1980-1981)	544509	5.51615e+06	6D-39D-18	6D-39D-11	6D-39D-11A	diorite	67.39	0.33	15.06	3.4	2.95	3.43		1.44	1.79	1.24	3.22923	0.051	0.08		1.57	0.83		0.83		99.56	68	221	12	7	113	40	5	14	20		537	37
Analysed by D. Racicot (1980-1981)	539640	5.514e+06	6D-3D-8	6D-3D-3A-G	6D-3D-3C	diorite	46.02	0.07	18.88	11.11	1.33	1.3		11.8	4.45	2.2	7.14529	0.102			0.06	1.99		1.99		99.31	28	215	7	7	4	54	3	286	261		293	67
Analysed by D. Racicot (1980-1981)	539640	5.514e+06	6D-3D-8	6D-3D-3A-G	6D-3D-3D	leucotonalite	71.45	0.13	17.01	3.74	0.24	6.45		0.45	0.27	0.5	0.800051	0.015	0.01		0.18	0.11		0.11		100.55		1035	6	6	63	5	1	10	21		577	7
Analysed by D. Racicot (1980-1981)	539640	5.514e+06	6D-3D-8	6D-3D-3A-G	6D-3D-3A	tonalite	70.85	0.14	16.74	4.17	0.3	6.16		0.84	0.46	0.53	1.0412	0.015	0.03		0.25	0.13		0.13		100.61		1160	6	6	69	7	1	10	15		504	10
Analysed by D. Racicot (1980-1981)	538073	5.52015e+06	6E-17R-19	6E-17R-11	6E-17R-11C	dyke	50	1.02	16.4	7.46	0.01	0.61		7.73	7.47	2.99	11.2914	0.15	0.22	0.02	0.57		0.02	5.38		100.731		244	17	9	117	88	16	106	128		268	153
Analysed by D. Racicot (1980-1981)	537151	5.51854e+06	6E-22D-2	6E-22D-2	6E-22D-2	dyke	53	1.02	16.6	9.41	0.05	3.71		6.01	3.91793	1.866	6.22	0.07	0.36	0.37	0.28		0.01	2.52		99.56		882	15	13	138	43	5	150	158		150	125
Analysed by D. Racicot (1980-1981)	549699	5.52087e+06	6F-16D-3	6F-16D-3	6F-16D-3	tonalite	73.24	0.18	14.73	2.44	1.78	4.8	4.737	0.69	0.6	1.25	1.91678	0.042	0.03		0.05	0.29		0.29		100.12	41	302	11	9	87	26	4	8	17	1.96	435	17	2.69	2.6	0.28	4.55	0.641	0.034	3.58	24.64	46.7		18.06
Analysed by D. Racicot (1980-1981)	548232	5.52177e+06	6F-30R-12	6F-30R-4AB	6F-30R-4B	dyke	50	0.62	12.3	10.5	0.07	3.22		11.31	5.11563	1.895	7.58	0.14	0.25	0.39	1.13		-0.01	2.88		100.24		863	15	16	117	136	4	323	514		293	102
Analysed by D. Racicot (1980-1981)	548210	5522178	6F-37D-25	37D-4B	6F-37D-4B	dyke	44.6	0.6	10.4	14.5	0.03	0.81		12.2	4.66	2.78	7.95866	0.22	0.21	0.03	5.57		0.04	4.2		101.149		864	14	14	97	219	1	442	592		17	109
Analysed by D. Racicot (1980-1981)	545327	5.52103e+06	6F-38D-1	6F-38D-1	6F-38D-1H	diorite	49.7	0.65	18.9	9.62	0.85	2.07		6.99	6.7	1.59	9.03571	0.121	0.08		0.15	1.83		1.83		99.25	21	201	11	6	41	85	21	109	147		134	203
Analysed by D. Racicot (1980-1981)	545327	5.52103e+06	6F-38D-1	6F-38D-1	6F-38D-1F	dyke	59	0.71	17.4	7.03	0.24	2.57		4.13	5.01	2.45	8.01761	0.09	0.15	0.08	0.09		0.01	3.06		102.488	5	201	16	8	140	70	41	71	103		78	132
Analysed by D. Racicot (1980-1981)	547088	5.52046e+06	6F-38D-4	6F-38D-4	6F-38D-4B	tonalite	78.81	0.04	12.71	1.05	1.66	4.84	5.467	0.09	0.07	0.67	0.747791	0.024			0.25	0.05		0.05		100.26	24	75	8	7	23	7	1	8	22	1.94	592	3	1.429	1.02	0.3	4.43	0.804	0.032	0.722	10.4	24.96		9.535
Analysed by D. Racicot (1980-1981)	558215	5.52402e+06	6G-73D-11	6G-73D-11	6G-73D-11B	dyke	68.9	0.38	17.2	2.62	0.93	5.9		0.94	1.03	0.85	1.99464	0.01	0.09	0.03	0.05		0.12	1.26		100.415	28	266	8	5	93	15	11	11	12		330	16
Analysed by D. Racicot (1980-1981)	558215	5.52402e+06	6G-73D-11	6G-73D-11	6G-73D-11C	dyke	48.9	0.71	15.5	8.98	-0.05	0.55		8.42	7.14	1.51	9.44468	0.11	0.13	0.03	3.06		0.19	4.93		100.795		146	12	6	65	78	26	251	193		39	142
Analysed by D. Racicot (1980-1981)	558215	5.52402e+06	6G-73D-11	6G-73D-11	6G-73D-11F	dyke	48.9	0.62	20	12	0.02	2.02		6.34	4.87	2.97	8.38203	0.09	0.09	0.02	0.16		-0.01	3.28		101.822		228	22	7	39	44	7	114	77		59	159
Analysed by D. Racicot (1980-1981)	555406	5.52455e+06	6G-73D-6	6G-73D-6	6G-73D-6B	dyke	50.6	0.79	18.9	9.53	-0.05	0.11		6.18	6.64	2.57	9.94903	0.07	0.08	0.11	0.14		0.16	4.66		101.159		154	15	4	43	97	25	127	142		36	207
Analysed by D. Racicot (1980-1981)	555406	5.52455e+06	6G-73D-6	6G-73D-6	6G-73D-6E	dyke	51.8	0.75	18.1	8.39	0.23	2.7		5.75	6.19	2.71	9.58895	0.16	0.11	0.01	0.11		0.03	3.46		101.029	3	217	15	4	67	102	12	105	103		54	170
Analysed by D. Racicot (1980-1981)	557119	5.52385e+06	6G-73D-9	6G-73D-9	6G-73D-9B	dyke	70.9	0.27	16.8	3.11	0.6	5.9	5.91	0.72	0.61	0.64	1.31789	0.01	0.08	0.02	0.04		0.08	1.02		100.858	15	354	6	4	127	15	2	10	11	4.39	293	18	2.07	2.82	0.05	3.09	0.612		3.75	12.89	25.43		12.11
Analysed by D. Racicot (1980-1981)	557119	5.52385e+06	6G-73D-9	6G-73D-9	6G-73D-9A	dyke	54	1.07	16.8	8.84	0.01	1.39		4.79	4.41	3.41	8.31083	0.08	0.39	0.03	0.05		-0.01	3.62		99.2908		322	22	11	165	56	10	81	119		72	164
Analysed by D. Racicot (1980-1981)	557119	5.52385e+06	6G-73D-9	6G-73D-9	6G-73D-9C	dyke	69.2	0.25	16.8	3.33	0.13	5.25		0.86	0.73	0.89	1.70125	0.02	0.08	0.11	0.19		0.13	1.33		99.3612	4	232	7	4	137	21	8	12	14		226	24
Analysed by D. Racicot (1980-1981)	561366	5.52985e+06	6J-61D-1	6J-61D-1A	6J-61D-1A	tonalite	65	0.42	18	2.29	1.21	6.03		2.29	2.25	1.33	3.83042	0.02	0.18	0.02	1.12		0.13	1.67		102.19	27	702	11	5	118	26		29	35		486	47
Analysed by D. Racicot (1980-1981)	560844	5.53034e+06	6J-61D-2	6J-61D-02A	6J-61D-2A	dyke	51.4	0.88	18.6	10.6	0.13	3.03		2.49	5.02	3.43	9.00873	0.17	0.12	0.12	0.76		0.12	2.5		99.7587	2	365	22	6	108	77	66	76	98		96	177
Analysed by D. Racicot (1980-1981)	560844	5.53034e+06	6J-61D-2	6J-61D-02C	6J-61D-2C	tonalite	66.2	0.35	17.1	1.54	1.77	5.83		1.77	1.86	0.99	3.05702	0.03	0.13	0.02	0.62		0.12	1.5		100.007	33	407	11	6	104	21		23	23		653	35
Analysed by D. Racicot (1980-1981)	545764	5.52697e+06	6K-78D-?	6K-78D-5	6K-78D-5	dyke	67.4	0.33	14.6	3.15	2.62	3		1.04	1.28678	1.43	2.86	0.11	0.09	1.09	3.91		0.14	1.3		101.53	71	118	12	6	99	137	23	10	12		626	30
Analysed by D. Racicot (1980-1981)	552696	5.53278e+06	6N-79D-?	6N-79D-02	9N-79D-2	dyke	68.8	0.23	17.2	3.6	0.89	6.33	6.33	0.78	1.02	0.74	1.87353	0.02	0.13	0.06	0.44		0.08	0.8		101.214	21	838	7	5	84	19	24	10	11	2.64	408	17	1.9	2.01	0.134	1.65	0.782	0.05	7.3	16.68	35.52		18.26
Analysed by D. Racicot (1980-1981)	552887	5.53273e+06	6N-79D-?	6N-79D-04	6N-79D-4	dyke	63.7	0.29	15.6	4.41	3.27	4.4		0.99	1.05417	0.9585	2.13	0.03	0.12	0.47	3.35		0.14	1.44		100.31	66	335	10	5	77	13	453	10	17		804	34
Analysed by D. Racicot (1980-1981)	540780	5514878	80D-?	80D-2C	6D-80D-2C	dyke	73.1	-0.1	16.3	3.12	0.36	6	6.01	0.37	0.13	0.41	0.554469	0.01	0.03	0.02	0.05		0.05	0.39		100.244	2	871	5	2	55	4	1	9	9	1.9	529	6	0.58	1.47	0.032	0.82	0.028		2.02	5.298	8.78		2.92
Analysed by D. Racicot (1980-1981)	540350	5.51094e+06	9M-12R-4	9M-12R-4	9M-12R-4	meladiorite	49.14	0.78	17.07	9.92	0.71	1.19		8.25	5.91	2.83	9.39778	0.166	0.11	0.05	0.12	2.43		2.43		99.31	18	297	14	6	28	82	12	163	283		141	145
Analysed by D. Racicot (1980-1981)	544030	5.50955e+06	9M-2R-7	9M-2R-6AB	9M-2R-6B	tonalite	73.57	0.16	13.75	0.46	3.47	1.13		0.81	0.6	2.54	3.20678	0.018	0.05	0.89	0.2	1.71		1.71		99.36	96	56	9	3	63	11		11	21		641	47
Analysed by D. Racicot (1980-1981)	544864	5.50758e+06	9M-40D-15	9M-40D-5	9M-40D-5D	dyke	68.5	0.13	15.1	2.77	4.3	1.99		0.59	1.09	1.75	2.96132	0.04	0.05	0.08	2.27		0.13	1.83		100.701	110	85	11	5	71	8	138	8	10		837	11
Analysed by D. Racicot (1980-1981)	543770	5.50866e+06	9M-41D-3	41D-3A	9M-41D-3A	dyke	65.9	0.29	17.1	1.69	2.82	6.5		0.88	0.51	1.85	2.41676	0.02	0.09	0.04	1.04		0.08	1.08		99.9268	49	304	8	4	85	17	155	14	20		968	20
Analysed by D. Racicot (1980-1981)	543770	5.50866e+06	9M-41D-3	41D-3B	9M-41D-3B	dyke	69	0.19	15.8	0.72	8	3.53		0.4	0.29	1.82	2.14228	0.01	0.05	0.08	0.48		0.07	0.67		101.132	75	138	9	4	29	5	198	8	5		2474	17
Analysed by D. Racicot (1980-1981)	543852	5.50865e+06	9M-41D-3	4D-3G	9M-41D-3G	dyke	71.09	0.22	15.3	0.53	1.84	7.2		0.55	0.22	2.56	2.80449	0.01	0.05	0.07	0.21		0.07	0.71		100.644	39	279	8	5	77	9	228	9	12		521	10
Analysed by D. Racicot (1980-1981)	543770	5.50866e+06	9M-41D-3	41D-3C	9M-41D-3C	tonalite	69.35	0.21	15.53	0.62	3.31	5.59		1.01	0.33	2.16	2.52673	0.014	0.07		0.45	1.1		1.1		99.74	74	150	10	5	65	12	1293	13	19		991	21
Analysed by D. Racicot (1980-1981)	543770	5.50866e+06	9M-41D-3	41D-3F	9M-41D-3F	tonalite	69.28	0.18	15.73	0.27	2.65	5.78		0.85	0.73	2.83	3.64125	0.007	0.06	0.11	0.07	0.94		0.94		99.49	62	256	8	5	84	10	195	13	21		634	23
Analysed by D. Racicot (1980-1981)	543770	5.50866e+06	9M-41D-3	41D-3J	9M-41D-3J	tonalite	74.57	0.1	13.84	0.46	6.78	2.44			0.07	0.31	0.387791	0.008	0.05	0.02	0.39	0.22		0.22		99.26	77	107	8	4	17	5	31	7			2821	19
Analysed by D. Racicot (1980-1981)	544532	5.51068e+06	9M-41D-7	9M-41D-2	9M-41D-2	leucotonalite	70.25	0.15	15.97	3.4	1.18	5.51	5.168	0.69	0.73	0.6	1.41125	0.027	0.02		0.56	0.41		0.41		99.5	22	461	6	6	61	16	1	9	15	1.54	638	10	1.557	1.68	0.14	0.99	0.252	0.016	2.873	8.601	16.3		6.248
Analysed by D. Racicot (1980-1981)	?	?	9M-81D-3	9M-81D-3	9M-81D-3	tonalite	68.38	0.22	15.58	2.05	3.2	2.89		0.86	1.13	1.58	2.83577	0.056	0.11	0.04	1.65	1.78		1.78		99.53	86	92	11	6	112	34	13	12	21		450	27
Analysed by D. Racicot (1980-1981)	?	?	9M-81D-6	9M-81D-6	9M-81D-6	tonalite	66.14	0.19	14.74	2.75	2.28	4.81		1.04	1.39	1.23	2.77471	0.06	0.07		3.72	0.97		0.97		99.39	54	263	9	5	77	14	5	13	22		744	22
Analysed by D. Racicot (1980-1981)	547829	5.5101e+06	9N-33R-1	9N-33R-1A-D	9N-33R-1B	leucotonalite	77.68	0.12	10.14	3.04	2.14			0.46	0.67	1.76	2.50457	0.046	0.06	0.15	1.93	1.3		1.3		99.5	38	273	8	2	59	18		7	7		609	13
Analysed by D. Racicot (1980-1981)	545238	5.51022e+06	9N-4D-5	9N-4D-3	9N-4D-3	tonalite	63.66	0.31	18.48	3.64	1.87	4.85		2.38	1.73	1.52	3.44255	0.048	0.11		0.42	1.41		1.41		100.43	42	535	9	7	81	27	5	27	43		696	52
Analysed by D. Racicot (1980-1981)	551911	5.50848e+06	9N-7D-4	9N-7D-2AB	9N-7D-2A	dyke	57.3	0.77	18.3	4.69	0.45	4.11		4.31	4.48	2.37	7.34862	0.08	0.21	0.07	0.07		-0.01	3.14		100.759	11	226	19	11	150	60	28	62	65		145	106
Analysed by D. Racicot (1980-1981)	553699	5.53199e+06	BR-2	BR-2	BR-2	dyke	58.9	0.36	18.9	5.61	2.01	3.38		3.09	2.32	2.65	5.22822	0.04	0.25	0.18	0.07		0.02	2.51		100.508	91	434	14	6	123	36	113	22	18		343	53
Analysed by D. Racicot (1980-1981)	553606	5.53219e+06	BRAR	BRAR	BRAR	dyke	67.1	0.29	16.9	1.4	4.2	6.3		0.9	1.41	0.91	2.47693	0.02	0.14	0.02	0.07		0.1	0.94		100.837	64	362	9	4	70	17	11	14	5		1484	27
Analysed by D. Racicot (1980-1981)	548226	5.52436e+06	CAME	CAME-1	CAME-1	dyke	68.9	0.31	15.8	1.93	1.62	5.08		1.02	1.04067	1.4135	2.57	0.02	0.07	2.3	0.71		0.11	1.25		101.67	48	200	10	6	97	23	67	10	13		548	31
Analysed by D. Racicot (1980-1981)	548226	5.52436e+06	CAME	CAME-3	CAME-3	dyke	38.2	0.73	11.1	13.6	-0.05	0.05		10.9	6.34932	1.764	8.82	0.16	0.67	0.45	9.48		0.24	5.5		99.69		133	23	10	192	225	120	269	742			169
Analysed by D. Racicot (1980-1981)	?	?	F-1-12	F-1-12	F-1-12	tonalite	64.88	0.2	16.72	3.22	2.52	5.15		0.99	0.8	0.97	1.85904	0.016	0.09		2.39	1.38		1.38		99.33	72	672	8	2	82	11		14	16		1401	24
Analysed by D. Racicot (1980-1981)	557455	5.53148e+06	GRY	GRY	GRY	tonalite	67.76	0.25	16.45	0.65	3.67	3.2		1.23	1.2	2.83	4.16356	0.06	0.12	0.18	0.29	1.82		1.82		99.71	100	58	14	4	95	25	56	15	12		698	33
Analysed by D. Racicot (1980-1981)	558821	5.51752e+06	PLD-17-11	PLD-17-6	PLD-17-6	leucotonalite	69.84	0.25	16.4	2.42	2.18	4.62		0.79	0.86	1.12	2.07572	0.031	0.07		0.64	0.68		0.68		99.9	40	394	12	8	83	21	1	11	23		620	21
Analysed by D. Racicot (1980-1981)	566014	5.52225e+06	PLD-2-4	PLD-2-3ABC	PLD-2-3C	diorite	55.3	0.44	21.88	9.41	0.39	4.28	4.467	3.46	1.79	1.73	3.71923	0.055	0.15		0.18	0.32		0.32		99.39	4	769	12	6	71	49	2	40	40	19.02	167	60	9.491	1.86	0.07	0.38	0.069	0.001	15.75	8.659	22.09		14.33
Analysed by D. Racicot (1980-1981)	?	?	PLD-29-3	PLD-29-3	PLD-29-3	tonalite	70.6	0.34	15.94	3.96	1.03	4.13		1.19	1.86	1.12	3.18702	0.049	0.07		0.07	0.22		0.22		100.58	26	293	7	8	125	52	2	15	19		404	29
Analysed by D. Racicot (1980-1981)	?	?	PLD-29-8	PLD-29-8	PLD-29-8	diorite	60.36	0.79	18.34	6.41	0.69	4.12	4.3	2.85	4.18	1.73	6.37523	0.088	0.11		0.07	0.45		0.45		100.19	14	380	12	7	83	67	21	27	44	18.55	232	114	11.89	1.94	0.16	0.84	0.151		18.78	8.101	17.01		9.503
Analysed by D. Racicot (1980-1981)	555251	5.52214e+06	PLD-30-3	PLD-30-3	PLD-30-3	diorite	52.19	1.15	15.84	8.58	0.26	2.93	3.274	2.14	5.44	7.04	13.0855	0.13	0.32	0.89	0.07	0.4		0.4		97.38	4	594	20	8	74	74	10	45	37	9.73	110	267	20.97	2.1	0.18	0.36	0.144	0.081	95.99	20.69	52.47		32.05
Analysed by D. Racicot (1980-1981)	555490	5.52281e+06	PLD-30-6	PLD-30-5AD	PLD-30-5A	diorite	64.53	0.46	16.55	5.17	0.99	4.17	4.283	2.33	3.32	1.16	4.84952	0.08	0.06		0.06	0.39		0.39		99.27	21	318	15	9	102	60	7	27	42	19.39	311	69	10.89	2.35	0.26	1.28	0.266	0.014	14.9	12.36	25.11		13.33
Analysed by D. Racicot (1980-1981)	555725	5.52299e+06	PLD-30-8	PLD-30-7AB	PLD-30-7A	dyke	58.45	0.92	17.1	6.87	0.01	2.7		3.4	5.04	2.16	7.76095	0.091	0.17	0.07	0.17	2.15		2.15		99.3	1	314	14	8	96	71	31	29	30		75	131
Analysed by D. Racicot (1980-1981)	568365	5.52389e+06	PLD-3-10	PLD-3-7	PLD-3-7	leucotonalite	68.02	0.2	17.41	3.44	1.75	5.56		6.91	0.07	1.75	1.82779	0.03	0.09		0.06	0.14		0.14		99.43	24	845	8	6	95	28	2	11	11		885	15
Analysed by D. Racicot (1980-1981)	555856	5.52252e+06	PLD-31-14	PLD-31-6B	PLD-31-6B	meladiorite	58.34	0.9	17.23	7.49	0.74	3.34		4.34	5.11	1.23	6.90874	0.103	0.3	0.04	0.07	0.33		0.33		99.56	12	398	7	13	166	77	45	86	70		231	117
Analysed by D. Racicot (1980-1981)	555725	5.52215e+06	PLD-31-6	PLD-31-4	PLD-31-4	diorite	51.03	0.97	18.14	8.07	0.93	4.22		5.33	4.71	3.74	8.97422	0.135	0.7	0.06	0.17	1.07		1.07		99.27	18	915	19	10	110	76	19	45	34		156	157
Analysed by D. Racicot (1980-1981)	555775	5.52229e+06	PLD-31-8	PLD-31-5	PLD-31-5	diorite	56.88	0.56	18.96	8.18	0.49	2.9		4.7	4.51	0.88	5.89196	0.088	0.04	0.02	0.07	1.06		1.06		99.34	9	347	9	6	68	55	22	74	72		177	110
Analysed by D. Racicot (1980-1981)	552240	5.52139e+06	PLD-32-22	POD-32-10	POD-32-10	tonalite	73.14	0.23	14.28	2.9	0.69	4.65		0.7	1.53	0.96	2.66029	0.049	0.03		0.07	0.47		0.47		99.7	15	214	11	10	140	33	8	11	20		345	13
Analysed by D. Racicot (1980-1981)	556697	5.52266e+06	PLD-32-6	PLD-32-3ABC	PLD-32-3C	leucotonalite	70.55	0.4	15.52	3.86	0.6	4.3		1.2	1.66	1.5	3.34476	0.056	0.11		0.07	0.79		0.79		100.62	11	415	10	9	162	40	2	10	15		283	27
Analysed by D. Racicot (1980-1981)	569496	5.5241e+06	PLD-5-1	PLD-5-1A-E	PLD-5-1E	leucotonalite	75.88	0.01	13.89	1.55	3.08	4.48	4.633	0.01	0.07	0.55	0.627791	0.015			0.08	0.05		0.05		99.67	37	256	6	5	44	4		6	11	0.25	959	4	0.851	1.29	0.06	1.35	0.779	0.034	0.373	5.22	10.13		2.889
Analysed by D. Racicot (1980-1981)	569573	5.52414e+06	PLD-5-2	PLD-5-2	PLD-5-2	tonalite	67.22	0.23	17.06	3.95	1.33	4.78		1.32	1.19	1.54	2.86245	0.065	0.05		0.14	0.59		0.59		99.47	27	441	10	7	117	42	2	12	15		448	31
Analysed by D. Racicot (1980-1981)	566341	5.52344e+06	PLD-6-5	PLD-6-3	PLD-6-3	leucotonalite	66.88	0.24	17.21	4.18	0.86	6.87		0.99	0.86	1.12	2.07572	0.03	0.06		0.06	0.39		0.39		99.75	15	685	7	6	83	31	2	14	21		485	21
Analysed by D. Racicot (1980-1981)	567714	5.52338e+06	PLR-2-12	PLR-2-7	PLR-2-7	leucotonalite	70.62	0.04	17.83	2.99	2.05	5.86		0.26	0.07	0.49	0.567791	0.013			0.09	0.1		0.1		100.41	20	703	5	5	58	6	1	8	14		1207	6
Analysed by D. Racicot (1980-1981)	567770	5.52279e+06	PLR-2-2	PLR-2-2	PLR-2-2	tonalite	66.62	0.25	16.98	4.21	1.52	4.61		1.77	1.33	1.58	3.05803	0.057	0.13		0.07	0.39		0.39		99.52	32	553	11	7	102	46	1	21	24		547	35
Analysed by D. Racicot (1980-1981)	553959	5.52227e+06	PLR-36-10	PLR-36-4	PLR-36-4	dyke	50.77	0.88	19.14	9.56	0.01	0.6		5.69	6.04	2.8	9.51225	0.131	0.13		0.15	3.42		3.42		99.32	1	265	15	8	60	87	13	101	105		72	206
Reanalysed by L. Mathieu (2018)	565377	5.52544e+06	PLR-7-2	PLR-7-2AB	PLR-7-2B	tonalite	70	0.26	16.1	3.66	1.3	4.62		0.96			2.88	0.06	0.07	0.01	0.073288				0.62	100.6	30.6	210	7.4	6.8	137	57	4	14	10		405	25	3	3.2	0.3	2.78	0.94	-0.05	7	32.8	53.8	7.03	24.8
Analysed by D. Racicot (1980-1981)	565377	5.52544e+06	PLR-7-2	PLR-7-2AB	PLR-7-2B	tonalite	70.95	0.25	15.73	3.5	1.11	4.41		1.02	1.86	0.74	2.80702	0.06	0.06	0.04	0.05	0.43		0.43		100.21	30	202	11	10	129	52	3	17	37		472	21
Analysed by D. Racicot (1980-1981)	565390	5.5253e+06	PLR-7-3	PLR-7-3AB	PLR-7-3A	diorite	54.88	1	17.38	7.59	0.85	3.56		4.1	5.11	3.56	9.23874	0.153	0.33	0.08	0.07	0.8		0.8		99.46	19	491	20	11	68	92	20	34	39		233	148
Analysed by D. Racicot (1980-1981)	570935	5.52503e+06	PLRD-15-9	PLRD-15-3	PLRD-15-3	diorite	66.02	0.3	17.41	4.54	1.31	4.93		2.05	1.59	1.21	2.97697	0.052	0.11		0.06	0.35		0.35		99.93	27	628	8	6	96	49	2	22	22		470	34
Analysed by D. Racicot (1980-1981)	575362	5.53214e+06	PMD-13-5	PMD-13-4	PMD-13-4	diorite	69.8	0.29	15.46	4.2	0.6	4.05		1.01	2.12	0.85	3.20596	0.055	0.05		0.06	0.8		0.8		99.35	14	254	9	8	145	43	1	13	18		220	25
Analysed by D. Racicot (1980-1981)	574098	5.52956e+06	PMD-20-5	PMD-20-3	PMD-20-3	tonalite	69.83	0.28	16	3.81	1.18	4.55		1.06	1.66	0.9	2.74476	0.045	0.07		0.06	0.32		0.32		99.77	24	324	7	8	114	42	2	13	20		403	23
Reanalysed by L. Mathieu (2018)	572738	5.5305e+06	PMD-8-2	PMD-8-1	PMD-8-1	diorite	51.7	0.67	18.45	9.66	0.21	3.25		6.78			8.66	0.11	0.12	0.03	0.073288				0.94	100.61	4.3	242	19.6	3.9	230	64	31	178	180		53.8	155	18	5.3	0.1	0.4	0.18	-0.05	31	8.6	22.4	3.25	15.7
Analysed by D. Racicot (1980-1981)	572738	5.5305e+06	PMD-8-2	PMD-8-1	PMD-8-1	diorite	51.73	0.67	18.5	9.61	0.17	3.09	3.325	7.27	6.17	1.06	7.91672	0.11	0.1		0.07	0.75		0.75		99.3	4	222	21	8	63	61	21	161	163	127.5	67	145	19.99	1.8	0.19	0.167	0.121	0.001	27.12	8.104	20.74		13.65
Reanalysed by L. Mathieu (2018)	572749	5.53041e+06	PMD-8-3	PMD-8-2ABC	PMD-8-2A	diorite	61.6	0.51	18.05	6.45	0.56	3.81		2.84			5.98	0.08	0.1	0.01	0.073288				1.16	101.19	11.6	281	9	3.3	137	63	28	41	30		138.5	88	10	3.5	0.1	1.04	0.2	-0.05	18	9.1	19.1	2.37	9.1
Analysed by D. Racicot (1980-1981)	572749	5.53041e+06	PMD-8-3	PMD-8-2ABC	PMD-8-2A	diorite	60.57	0.53	18.11	6.25	0.54	3.92		2.98	3.78	1.42	5.62071	0.092	0.07		0.05	0.94		0.94		99.25	11	284	13	7	81	61	24	39	39		170	87
Reanalysed by L. Mathieu (2018)	572203	5.52806e+06	PMD-9-5	PMD-9-6A-D	PMD-9-6B	tonalite	70.6	0.15	16.95	3.57	1.12	5.14		0.83			1.47	0.01	0.08	0.01	0.146576				0.52	100.58	21.6	613	1.4	1.5	70	24	1	11	10		613	14	1	1.5	-0.1	0.54	0.15	-0.05	4	5.6	11.4	1.3	4.7
Reanalysed by L. Mathieu (2018) - duplicata	572203	5.52806e+06	PMD-9-5	PMD-9-6A-D	PMD-9-6B	tonalite	69.2	0.14	16.65	3.51	1.09	5.05		0.81			1.44	0.01	0.08								20.3	601	1.3	1.4	70				20		591	15		1.6	-0.1	0.42	0.13	-0.05		5.3	11	1.2	4.6
Analysed by D. Racicot (1980-1981)	572203	5.52806e+06	PMD-9-5	PMD-9-6A-D	PMD-9-6B	tonalite	69.85	0.14	17.13	3.51	1.11	5.64		0.85	0.66	0.8	1.53346	0.026	0.04		0.07	0.11		0.11		99.49	20	613	6	6	71	22	1	15	22		645	15
Analysed by D. Racicot (1980-1981)	572240	5.52754e+06	PMD-9-8	PMD-9-7C	PMD-9-7D	diorite	57.28	0.34	18.07	6.56	1.76	4.24		5.96	2.52	1.69	4.49048	0.082	0.04		0.07	0.66		0.66		99.27	40	515	11	7	64	49	15	99	317		530	95
Analysed by D. Racicot (1980-1981)	576331	5.52954e+06	PMR-17-9	PMR-17-5	PMR-17-5	diorite	56.13	0.39	15.56	7.57	1.7	3.98		10.61	3.52	1.52	5.43178	0.122	0.22		0.06	0.36		0.36		99.74	37	349	13	9	77	93	22	235	733		806	119
Reanalysed by L. Mathieu (2018)	577254	5.53186e+06	PMR-26-8	PMR-26-5	PMR-26-5	diorite	65.7	0.3	18.45	5.26	1.36	4.5		1.59			3.37	0.03	0.09	0.02	0.073288				0.48	101.22	31.1	457	5.1	1.4	140	54	8	19	20		325	45	5	3.3	-0.1	0.18	0.13	-0.05	10	4.7	9.7	1.34	6.6
Analysed by D. Racicot (1980-1981)	577254	5.53186e+06	PMR-26-8	PMR-26-5	PMR-26-5	diorite	65.11	0.3	18.4	5.23	1.32	4.93		1.68	1.66	1.21	3.05476	0.046	0.05		0.08	0.2		0.2		100.22	42	447	7	5	119	47	6	21	32		36	396
Analysed by D. Racicot (1980-1981)	571366	5.52907e+06	PMR-9-1	PMR-9-1A-E	PMR-9-1B	diorite	53.59	0.91	17.96	8.39	0.26	3.8		5.16	6.7	1.46	8.90571	0.13	0.11		0.05	0.76		0.76		99.28	4	263	19	8	78	70	22	75	83		120	177
Analysed by D. Racicot (1980-1981)	546963	5.53331e+06	RAFP	RAFP	RAFP	dyke	60	0.33	18	3.69	2.35	7.75	7.48	2.97	2.72	1.1	4.12274	0.04	0.17	0.01	0.02		0.08	0.94		100.433	29	524	12	6	126	32	1	28	31	26.14	445	56	6.26	3.13	0.14	5.66	1.159		16.51	39.79	80.48		37
[truncated: 28 more columns]

## Sheet: S7
Sample_nb	Sample_name	La (ppm)	Ce	Pr	Nd	Sm	Eu	Gd	Tb	Dy	Ho	Er	Tm	Yb	Lu
5H-27R-4	diorite	12.36	26.3		13.08	2.698	0.74	4.48	0.17		0.362		0.23	1.27	0.19
PLD-2-3C	diorite	8.659	22.09		14.33	2.76	0.86	2.56	0.172		0.194		0.12	0.55	0.066
PMD-8-1	diorite	8.104	20.74		13.65	3.426	0.956	5.5	0.59		0.631		0.35	1.929	0.27
PLD-30-5A	diorite	12.36	25.11		13.33	2.769	0.79	1.38	0.25		0.338		0.11	0.91	0.127
PLD-29-8	diorite	8.101	17.01		9.503	1.882	0.77	1.32	0.2		0.191		0.09	0.73	0.112
PLD-30-3	diorite	20.69	52.47		32.05	5.784	1.75	4.7	0.45		0.565		0.165	1.54	0.208
6D-80D-2C	dyke	5.298	8.78		2.92	0.425	0.34	1.115	0.06					0.17	0.197
9N-79D-2	dyke	16.68	35.52		18.26	2.496	0.69	1.893	0.15		0.138			0.31	0.146
6G-73D-9B	dyke	12.89	25.43		12.11	1.799	0.48	2.631	0.14		0.037			0.3	0.092
6B-75D-2E	dyke	17.61	31.23		11.46	1.462	0.45	2.07	0.1		0.177			0.59	0.185
6C-15D-4B	dyke	17.66	33.42		16.05	2.214	0.64		0.13		0.284			0.64	0.25
5A-21D-4I	dyke	14.68	26.58		13.49	2.333	0.71		0.28		0.284			0.87	0.13
RAFP	dyke	39.79	80.48		37	4.606	1.26		0.26		0.078			0.69	0.215
5G-35D-2B	dyke	27.62	60.16		33.74	5.875	1.72	1.858	0.66		0.622			2.12	0.209
6D-39D-7	dyke	11.21	22.32		11.34	1.86	0.63	1.005	0.25		0.195			0.66	0.209
9M-41D-2	leucotonalite	8.601	16.3		6.248	1.028	0.31	0.34	0.019		0.096		0.04	0.24	0.04
5A-16R-2C	leucotonalite	74.85	133.5		42.6	4.788	1.35	2.32	0.24		0.316		0.11	0.66	0.123
PLD-5-1E	leucotonalite	5.22	10.13		2.889	0.611	0.35		0.05		0.097			0.24	0.025
5A-27D-5B	meladiorite	9.607	20.96		11.95	2.415	0.828	3.06	0.24		0.296		0.2	1.1	0.133
5A-21D-4D	meladiorite	20.94	49.27		29.57	5.643	1.554	4.12	0.4		0.523		0.23	1.386	0.186
6C-8D-6	meladiorite	9.689	21.79		14.46	2.99	0.97	2.73	0.31		0.389		0.1	0.9	0.113
5A-15R-4	meladiorite	11.79	29.33		16.97	3.459	1.22	4.15	0.33		0.4		0.17	1.15	0.159
6F-16D-3	tonalite	24.64	46.7		18.06	2.498	0.47		0.05		0.085		0.07	0.4	0.048
6F-38D-4B	tonalite	10.4	24.96		9.535	1.778	0.35	0.81	0.15		0.164		0.07	0.48	0.071
5H-26D-11	tonalite	19.09	33.63		11.92	1.773	0.55	1.31	0.19		0.159		0.11	0.55	0.082
6C-15D-5	tonalite	11.97	22.63		8.606	1.536	0.66	1.75	0.1		0.129		0.03	0.37	0.046
5H-26D-6	tonalite	23.37	41.85		13.64	1.997	0.66	2.26	0.19		0.262		0.08	0.69	0.098
5A-16R-1B	leucotonalite	4.6	11.5	1.26	4.4	0.88	0.05	1.11	0.28	1.83	0.41	1.43	0.22	1.58	0.28
PMR-26-5	diorite	4.7	9.7	1.34	6.6	1.35	0.68	1.36	0.21	1.03	0.2	0.53	0.07	0.33	0.06
PMD-9-6A-D	tonalite	5.6	11.4	1.3	4.7	0.66	0.4	0.46	0.06	0.37	0.05	0.2	0.01	0.2	0.02
PMD-8-1	diorite	8.6	22.4	3.25	15.7	3.7	1.13	3.82	0.62	3.82	0.67	2.41	0.29	1.87	0.24
PMD-8-2ABC	diorite	9.1	19.1	2.37	9.1	1.9	0.65	1.76	0.26	1.56	0.36	0.93	0.15	0.95	0.13
5H-27R-4	diorite	10.7	25.3	3.33	12.8	2.93	0.87	2.67	0.36	2.4	0.47	1.4	0.21	1.33	0.19
PLR-7-2AB	tonalite	32.8	53.8	7.03	24.8	3.09	0.72	2.21	0.32	1.4	0.25	0.67	0.08	0.7	0.08
5A-21D-4	meladiorite	34.1	74.2	9.32	37.6	6.03	2.09	5.05	0.59	3.43	0.66	1.68	0.23	1.51	0.25

## Sheet: S8
Sample_analysed	Name_sample	Petrographic observations (dominant ferromagnesian mineral)	Apatite (wt%)	Titanite (wt%)	Hornblende (wt%)	Biotite (wt%)	Anorthite (wt%)	Orthoclase (wt%)	Albite (wt%)	Quartz (wt%)	Amount-left (oxyde wt%)
6D-39D-11A	diorite	Bt	0.154769	0.833637	0	8.37907	15.6396	12.0834	29.8711	30.195	1.95036
PLD-30-5A	diorite	Bt > Hnbl	0.114128	1.14253	8.24842	8.52447	18.6049	0	35.1476	24.4415	2.02254		Abbreviations
PMD-13-4	diorite	Bt > Hnbl	0.0954303	0.722741	3.41437	5.28944	17.6229	0	34.5684	35.1181	2.24732		Petrographic observations
6F-39D-8A	diorite	Hnbl > Bt	0.610159	1.99183	16.6326	7.65563	13.967	0	30.458	21.4665	4.57135		Bt	biotite
PLD-30-3	diorite	Hnbl > Bt	0.626433	2.93962	23.4845	2.37337	23.1066	0	24.2622	13.2647	7.10674		Hnbl	hornblende
6D-3D-3C	diorite	Hnbl > Bt	0	0.176648	51.9323	10.9707	21.4808	0	7.65072	0	3.21599		Act	actinolite
5A-32D-2A	diorite	Hnbl > Bt	0.306647	1.50155	3.28868	9.83822	19.2026	0	29.1962	30.5677	4.68025		Chl	chlorite
6F-38D-1H	diorite	Hnbl > Bt	0.154594	1.64016	42.0661	7.28512	18.6246	0	15.1189	5.65032	4.34178
5H-27R-4	diorite	Hnbl > Bt	0.154768	1.642	25.8303	5.64176	18.5247	0	24.6279	16.5608	3.73479
PLD-29-8	diorite	Hnbl > Bt	0.207455	1.94548	16.7616	5.89867	17.5991	0	33.844	17.3573	3.99738
PLD-31-5	diorite	Hnbl > Bt	0.0765752	1.39986	29.065	4.16096	20.0269	0	22.9962	15.1324	3.70177
PMD-9-7D	diorite	Hnbl > Bt	0.0763001	0.846862	13.6348	14.3891	22.4121	0	35.4498	9.30128	1.0187
PMD-8-1	diorite	no thin section available	0.19087	1.66987	41.0293	1.43071	18.3756	0	23.7218	4.43335	4.73114
PLR-7-3A	diorite	no thin section available	0.629661	2.4915	23.6534	7.29331	17.1387	0	28.9692	11.4259	5.05989
PMR-9-1B	diorite	no thin section available	0.209979	2.26826	40.4836	2.23538	12.0605	0	29.9032	4.89627	3.47663
5A-21D-4E	diorite	no thin section available	0.281948	1.54628	24.2914	3.6731	14.3539	0	30.9102	17.7219	4.27471
PMD-8-2A	diorite	no thin section available	0.133906	1.32387	18.3429	4.64811	17.3047	0	32.509	19.3113	4.02225
PMR-17-5	diorite	no thin section available	0.408136	0.944748	37.6818	13.4116	8.89295	0	30.5761	2.48376	0.296598
PLD-31-4	diorite	no thin section available	1.34298	2.43003	27.3173	7.88636	14.7982	0	34.566	2.47981	5.24775
PLD-2-3C	diorite	no thin section available	0.285133	1.09214	16.4427	3.20105	33.6934	0	35.4743	5.92261	1.8109
PLRD-15-3	diorite	no thin section available	0.207759	0.739873	0	9.60518	20.8595	0.905752	41.9158	23.2499	1.49044
PMR-26-5	diorite	no thin section available	0.0940447	0.736808	0	8.58687	24.5906	1.73078	41.7421	20.5558	1.06493
9N-7D-2A	dyke	Act	0.40665	1.94698	27.9663	3.8803	1.51064	0	33.912	17.3399	9.65934
6E-17R-11C	dyke	Act	0.439647	2.66165	51.9482	0.0886774	0	0	1.92244	22.389	15.0804
6F-30R-4B	dyke	Act	0.492475	1.59479	68.421	0.59233	4.78355	0	23.7538	0	-1.56699
6G-73D-11C	dyke	Act	0.265681	1.89471	62.5746	0.225244	3.63812	0	0.746487	15.8052	8.31791
6F-38D-1F	dyke	Act, Chl	0.285436	1.76419	30.8311	2.04963	11.7632	0	19.9152	22.6495	7.27819
6B-53D-3	dyke	Act, Chl	0.515332	1.94108	52.9214	0.175033	5.59409	0	1.62004	20.4524	11.1886
6J-61D-2A	dyke	Act, Chl	0.23528	2.25297	25.7309	1.17535	34.4143	0	25.023	6.54549	1.77389
PLD-30-7A	dyke	Act, Chl	0.329733	2.33007	31.043	0.0879551	10.6727	0	21.4753	23.3534	7.40613
6G-73D-9C	dyke	Act, Chl	0.154168	0.629089	4.58433	1.10512	12.4923	0	45.2276	31.2239	3.96278
9M-41D-3G	dyke	Bt	0.0943904	0.542312	0	2.13713	1.54301	9.35064	61.1862	21.4326	3.47552
9M-41D-3B	dyke	Bt	0.0941635	0.467234	0	1.8264	2.5884	46.0559	29.9261	16.6235	2.21063
9M-41D-3A	dyke	Bt	0.173243	0.728921	0	3.83081	6.9494	14.2905	56.3236	14.4917	2.78273
6D-80D-2C	dyke	Bt	0.0564585	0.12287	0	1.40275	15.1266	1.09611	50.8303	30.2964	0.913661
6K-78D-5	dyke	Bt	0.17797	0.852091	0	6.3341	14.6123	11.8704	26.7047	35.4269	3.33284
9N-79D-2	dyke	Bt	0.244997	0.565996	0	4.51008	16.2517	2.12625	53.7012	21.457	0.624101
6N-79D-4	dyke	Bt	0.237879	0.750656	0	5.50553	21.1809	16.4992	39.2636	17.6114	-1.66662
5A-21D-4I	dyke	Bt > Hnbl	1.64702	1.03824	5.70133	8.07146	15.1036	0	32.5097	28.6548	5.47286
6C-15D-4B	dyke	Bt > Hnbl	0.285783	0.995116	0	12.5745	26.3071	0.216535	34.3916	20.1017	3.78383
6G-73D-9B	dyke	Chl	0.150919	0.665097	0	3.45943	14.0163	1.09152	50.1035	28.1525	1.97316
9M-40D-5D	dyke	Chl	0.0975854	0.331304	0	4.27297	13.4594	23.4589	17.4836	36.1039	4.33074
5A-27D-3	dyke	Chl	0.15562	1.52403	19.2934	2.91182	15.0816	0	29.9569	22.7515	5.99188
6E-22D-2	dyke	Chl	0.704782	2.60748	39.5891	0.426475	16.2047	0	29.9447	4.55734	1.68869
6B-75D-2E	dyke	Chl	0.152017	0.669938	0	6.63455	13.0651	3.86143	42.9407	28.8785	3.08884
6G-73D-11B	dyke	Chl	0.17114	0.943543	0	5.0362	11.2154	2.01211	50.5039	26.2511	3.31225
6G-73D-9A	dyke	Hnbl	0.770122	2.75897	36.2099	0.0874096	15.712	0	9.86672	22.3118	8.3613
6G-73D-6B	dyke	Hnbl	0.157469	2.03049	14.2489	0.21941	36.7739	0	0	28.564	16.476
6F-37D-4B	dyke	Hnbl	0.433727	1.61814	75.4592	0.264776	24.5129	0	2.21861	0	-6.02802
6B-52D-4	dyke	Hnbl	0.215346	1.02252	19.6877	0.607335	12.3246	0	35.8372	23.1777	4.98505
6B-52D-2	dyke	Hnbl	0.502108	2.80614	54.3582	0.270331	0	0	1.90293	18.1283	16.2681
6B-75D-2C	dyke	Hnbl	0.308209	1.03128	0	15.8593	22.835	5.8977	31.4771	17.6584	3.25317
6G-73D-11F	dyke	Hnbl	0.172766	1.55409	43.5882	0.1685	29.2144	0	14.4416	2.66899	3.64706
6D-39D-7	dyke	Hnbl > Bt	0.172572	0.90136	33.8415	1.32483	10.148	0	34.5775	10.631	4.75668
6G-73D-6E	dyke	Hnbl > Bt	0.213403	1.89993	42.8397	1.99123	11.5566	0	20.6508	9.29779	6.87372
5A-21D-4J	dyke	Hnbl > Bt	0.423875	1.76109	26.7563	4.74238	17.446	0	28.0101	13.6828	3.82955
5G-35D-2B	dyke	Hnbl > Bt	0.645818	3.10034	27.5032	5.48778	13.3425	0	28.318	13.5199	4.52384
5G-28R-5A	dyke	Hnbl > Bt	0.535171	1.89678	10.7602	7.35791	16.9964	0	30.9343	25.9186	3.60799
5H-19R-14C	dyke	Hnbl > Bt	0.351344	1.14694	36.7037	6.55816	9.5551	0	27.9419	11.2848	1.93671
CAME-3	dyke	no thin section available	1.50738	2.14457	7.26578	0.243968	67.6388	0	0	11.6736	8.4066
PLR-36-4	dyke	no thin section available	0.255203	2.25577	45.3297	0.0875251	15.8356	0	2.20139	19.0708	10.2153
6B-75D-3C	dyke	no thin section available	0.195577	1.02152	21.9496	18.5998	11.6651	0	21.8901	14.1831	6.30717
BR-2	dyke	no thin section available	0.481923	0.906167	0	14.5311	25.5814	1.76102	29.3303	21.0262	4.7911
CAME-1	dyke	no thin section available	0.135363	0.782766	0	5.41286	8.26893	6.02399	44.221	30.2944	4.27664
BRAR	dyke	no thin section available	0.264293	0.714866	0	5.6918	5.04239	20.9919	53.5379	12.0473	1.06417
RAFP	dyke	no thin section available	0.322384	0.817161	0	14.7687	16.1888	3.51707	66.1592	0	-2.09253
9M-41D-2	leucotonalite	Bt	0.0381559	0.373672	0	3.69596	16.457	4.4729	47.3201	26.966	0.289941
PLD-5-1E	leucotonalite	Bt	0	0.0246592	0	0.207657	7.69064	18.1529	38.0848	34.8829	0.93492
PLD-17-6	leucotonalite	Bt	0.133472	0.622446	0	4.28039	10.8314	10.056	39.655	30.254	3.6991
PLD-32-3C	leucotonalite	Bt > Hnbl	0.207272	0.984183	2.99731	5.11253	15.1406	0	36.2706	35.0184	3.38716
5H-25D-9	leucotonalite	Chl	0.0189306	0.395505	0	1.49567	7.26717	10.0892	43.3755	35.5413	1.65944
6B-63D-1A	leucotonalite	Chl	0.0562669	0.416341	0	2.77379	10.5	8.09399	37.9934	37.564	2.30516
5A-16R-2C	leucotonalite	Chl	0	0.368301	0	2.11563	10.2964	1.24175	47.6556	36.8975	1.20841
PLD-6-3	leucotonalite	Hnbl	0.113576	0.593222	0	4.85176	19.6469	1.66523	58.5406	15.1282	-1.06024
6D-3D-3D	leucotonalite	Hnbl	0.0187472	0.318236	0	1.93688	17.9887	0.0141287	54.4327	25.0606	0.0290318
9N-33R-1B	leucotonalite	no thin section available	0.117339	0.306437	0	2.98255	14.8485	11.0931	0	65.7905	4.52891
6C-30R-13A	leucotonalite	no thin section available	0.282095	0.736705	0	6.58713	14.7013	0.878615	38.8579	34.2861	2.92937
5A-16R-1B	leucotonalite	no thin section available	0	0.0245212	0	0.683835	2.29471	24.0714	43.1129	29.8055	-0.0638489
PLD-3-7	leucotonalite	no thin section available	0.160764	0.466493	10.5774	12.8376	7.69561	0	43.9433	18.4688	3.45187
PLR-2-7	leucotonalite	no thin section available	0	0.0979597	0	0.950681	14.6617	11.3834	49.4743	22.2632	1.07292
9M-12R-4	meladiorite	Act	0.215211	1.99267	48.0827	6.07991	15.8445	0	7.1498	9.2384	5.78201
6C-8D-6	meladiorite	Hnbl	0.210573	1.54978	19.3928	5.66139	24.4097	0	34.6123	8.45473	3.07676
5H-18D-8B	meladiorite	Hnbl > Bt	0.63246	3.63891	55.6236	2.92772	3.15958	0	16.9427	4.91547	5.96188
5A-27D-5B	meladiorite	Hnbl > Bt	0.229838	1.75068	36.4189	7.4184	20.0852	0	19.1278	7.79212	2.61755
5A-32R-2C	meladiorite	Hnbl > Bt	0.151451	1.1124	9.94762	6.15639	18.7857	0	34.5216	24.7426	2.88692
PLD-31-6B	meladiorite	Hnbl > Bt	0.568897	2.22855	25.8315	6.28892	15.5339	0	26.7508	16.0967	3.25558
5A-15R-4	meladiorite	no thin section available	0.447198	3.96064	62.6655	4.64554	3.25285	0	3.74329	6.12949	8.117
5A-16R-4	meladiorite	no thin section available	0.981662	2.86527	47.2766	3.04188	20.1935	0	19.8665	0	3.32471
5A-27D-5A	meladiorite	no thin section available	0.708739	1.25061	33.2053	7.36148	20.4289	0	20.9779	9.64814	2.09121
5A-21D-4D	meladiorite	no thin section available	0.801655	3.56404	47.0652	6.1606	10.8962	0	21.28	0	4.6684
5A-21D-4B	meladiorite	no thin section available	2.38056	5.14764	43.3012	3.57311	2.62774	0	27.8673	0.683221	9.00643
9M-41D-3C	tonalite	Bt	0.133998	0.524915	0	3.81392	1.92175	17.1002	48.17	23.6217	4.29706
6J-61D-2C	tonalite	Bt	0.250446	0.880454	0	9.46261	5.71035	4.04271	50.5594	23.4151	4.65433
6C-15D-5	tonalite	Bt	0.13216	0.665631	0	6.24756	16.8837	3.83564	38.9251	30.6403	1.99991
9N-4D-3	tonalite	Bt	0.209706	0.7717	0	10.9856	16.4911	3.32219	41.622	21.3361	4.09535
PLD-5-2	tonalite	Bt	0.0951887	0.571757	0	6.65023	18.7051	3.24053	40.9644	26.5124	2.56055
6C-8R-10	tonalite	Bt	0.283681	0.666763	0	6.97517	8.05073	2.26446	52.5276	26.1297	2.3224
6C-77D-3A	tonalite	Bt	0.17114	0.869053	0	6.94433	19.301	3.4191	42.7999	24.5377	1.21062
6J-61D-1A	tonalite	Bt > Hnbl	0.341693	1.04107	2.18903	10.1952	7.37403	0	51.3779	20.9408	5.19448
5H-32D-9	tonalite	Chl	0.0188478	0.787552	0	4.21402	10.109	4.66271	39.4527	38.0905	2.22673
5H-26D-11	tonalite	Chl	0.560767	0.807984	0	7.6363	11.9088	0.886218	38.039	36.2272	3.0193
5H-26D-6	tonalite	Chl	0.0379594	0.470881	0	4.11201	10.571	6.22962	38.8744	36.8882	2.38557
9M-81D-3	tonalite	Chl	0.215256	0.562151	0	5.24923	9.04187	16.0309	25.4579	36.8604	5.99519
9M-81D-6	tonalite	Chl	0.138942	0.492446	0	6.47311	13.2248	9.7217	42.9778	25.2213	1.0551
POD-32-10	tonalite	Chl	0.056869	0.569312	0	5.42246	13.5036	0.430058	39.6799	37.8141	1.95246
9M-41D-3F	tonalite	Hnbl	0.114654	0.449136	0	4.14743	0.325808	12.9637	49.7196	25.6642	6.16614
9M-2R-6B	tonalite	no thin section available	0.0973348	0.406712	0	3.84552	1.44794	18.4795	9.90238	54.882	10.5248
9M-41D-3J	tonalite	no thin section available	0.095292	0.24886	0	0.16423	1.62946	40.5221	20.9334	34.1287	2.23871
GRY	tonalite	no thin section available	0.231537	0.629864	0	6.47324	1.61145	17.6851	27.794	35.1422	9.71852
PLD-29-3	tonalite	no thin section available	0.131199	0.83211	0	7.51015	17.9524	0.879087	34.8455	34.5039	2.54498
PLR-7-2B	tonalite	no thin section available	0.113132	0.615522	0	7.06665	16.1511	1.73672	37.4314	34.0141	2.11923
PMD-20-3	tonalite	no thin section available	0.132393	0.6915	0	6.76009	17.5772	2.34524	38.7383	31.2853	1.74591
6B-75D-3A	tonalite	no thin section available	0.112906	0.417717	0	3.71682	9.84186	15.3411	38.966	29.5681	1.6307
PLR-2-2	tonalite	no thin section available	0.246686	0.619455	0	8.26818	19.3485	3.14584	39.3791	25.7653	2.32846
5H-33D-4D	tonalite	no thin section available	0.282742	2.36287	5.28269	5.60781	11.5776	0	39.6104	30.5779	3.50848
6F-16D-3	tonalite	no thin section available	0.0565139	0.442767	0	3.41085	11.3067	8.11872	40.7041	33.5733	2.02638
6F-38D-4B	tonalite	no thin section available	0	0.0982135	0	0.465862	5.07165	9.48438	40.9686	42.1005	1.76346
F-1-12	tonalite	no thin section available	0.17704	0.513721	0	4.88086	15.3733	12.0969	45.6036	19.6589	1.15759
PMD-9-6B	tonalite	no thin section available	0.0753715	0.344464	0	3.98416	16.7052	3.72583	47.8398	25.5561	1.34598
6D-3D-3A	tonalite	no thin section available	0.0562585	0.342818	1.56412	2.43484	18.9148	0	51.8917	24.7176	-0.342719
5A-70D-1	tonalite	no thin section available	0.150752	0.615151	0	3.02907	14.4189	6.88142	52.5931	20.3947	1.57616
