# Supplementary material
Source: MDPI journal article supplement (https://www.mdpi.com/2075-163X/9/3/174)
Supplement: s1 [file s1 › Supplemental_material_S3-4.xlsx]

## Sheet: S3_a
	Analysed values				Reference values
	UQAC-FeS1-22-1	UQAC-FeS1-22-2	UQAC-FeS1-22-3		Reference values	Uncertainty
Spot Size (µm)	75	75	75					Used for	Reference material for most elements (except Ca, Zr, Al)
Start (s)	28.482	22.627	22.925					Standard Name	UQAC-FeS1
End (s)	58.353	58.651	58.75					Data source	Savard et al. (2018)
Time (s)	29.871	36.024	35.826					Matrix	Artificial sulfide
Element Total	93.22	92.35	94.63
27Al	1285.85	1443.06	1298.9
28Si	28453.7	29038	27408.4		28300	2800
29Si	28957.2	28306.7	27636.1		28300	2800
33S	397290	389767	412944		400000	40000
34S	396614	388095	415291		400000	40000
44Ca	607.28	649.2	627.83
47Ti	287.6	307.65	304.76		300	30
49Ti	288.98	312.59	298.43		300	30
51V	20.69	21.56	20.75		21	2.1
52Cr	250.91	242.19	256.9		250	25
53Cr	248.99	250.73	250.28		250	25
55Mn	58.15	57.7	58		58	5.8
57Fe	450000	450000	450000		450000	45000
59Co	643.98	660.85	650		650	65
60Ni	24663.1	25613.7	25000		25000	2500
61Ni	26137.4	25711.4	23151.2		25000	2500
65Cu	23381.2	22829	22789.9		23000	2300
66Zn	270.89	283	275		275	27.5
71Ga	9.91	10.28	9.82		10	1
72Ge	3.04	3.01	2.95		3	0.3
75As	1105.86	1034.79	1009.35		1050	105
82Se	247.62	252.2	250.19		250	25
90Zr	16.11	13.23	34.18
91Zr	15.47	12.33	34.38
95Mo	63.3	66.78	64.92		65	6.5
96Mo	63.21	65.21	66.57		65	6.5
105Pd	47.1	49.35	53.54		50	5
107Ag	174.99	180.42	169.59		175	17.5
108Pd	49.9	49.04	51.05
111Cd	2.18	1.95	1.87		2	0.2
115In	9.76	10.26	9.97		10	1
118Sn	170.75	175.84	193.41		180	18
121Sb	92.99	98.88	108.13		100	10
125Te	169.96	171.81	168.23		170	17
126Te	169.51	172.12	168.37		170	17
138Ba	245.87	246.34	257.79		250	25
182W	1463.52	1517.95	1518.53		1500	150
197Au	70.05	75.32	79.63		75	7.5
202Hg	20.35	21.26	18.4		20	2
205Tl	0.3	0.31	0.29		0.3	0.03
208Pb	98.22	96.22	105.56		100	10
209Bi	143.7	154.92	151.37		150	15

## Sheet: S3_b
	Analysed values					Reference values
	GSE-0	GSE-1	GSE-2	GSE-3		Certified values	Uncertainty		Used for	Reference material for Ca, Zr and Al
Spot Size (µm)	75	75	75	75					Standard Name	GSE-1g
Start (s)	21.138	24.413	22.031	20.741					Data source	GeoRem database as of fev11
End (s)	59.346	58.75	59.048	59.147					Matrix	Glass
Time (s)	38.207	34.337	37.016	38.406
Element Total	50.08	49.59	49.58	49.33
27Al	69047.6	68166.9	68973.7	69027.8		68804	2117
28Si	269913	265069	264060	259157		250994	7011
29Si	277170	272210	270843	265642		250994	7011
33S	1624.74	2283.62	2012.16	4094.73
34S	1685.89	2819.33	1862.74	3711.35
44Ca	52671.4	52207.4	53158.5	53394.7		52858	2143
47Ti	463.86	461.4	474.77	474.77		450	42
49Ti	453.05	451.43	458.76	461.42		450	42
51V	445.26	443.53	451.65	449.34		440	20
52Cr	371.93	371.14	377.59	373.96		400	80
53Cr	378.84	380.86	383.93	378.56		400	80
55Mn	555.97	572.37	616.62	736.83		590	20
57Fe	98717	98717	98717	98717		98717	2332
59Co	356.79	363.2	370.11	390.23		380	20
60Ni	389.62	391.37	401.36	427.96		440	30
61Ni	414.71	416.21	413.32	409.46		440	30
65Cu	388.74	387.56	384.8	394.37		380	40
66Zn	370.05	385.32	409.55	474.86		460	10
71Ga	515.71	518.55	523.94	525.93		490	70
72Ge	337.11	339.36	342.05	348.12		320	80
75As	307.04	310.76	297.5	291.7		260	90
82Se	41.66	39.3	40.26	38.7		20	16
90Zr	399.94	408.1	412.23	419.72		410	30
91Zr	399.78	406.53	413.93	419.76		410	30
95Mo	364.89	372.67	371.88	380.7		390	30
96Mo	318.54	323.36	325.17	331.26		390	30
105Pd	110.19	112.85	103.95	122.84
107Ag	200.08	200.76	199.54	198.41		200	20
108Pd	109.21	119.57	126.35	133.23
111Cd	218.36	218.94	218.5	218.63		160	50
115In	334.21	336.17	342.95	349.34		370	60
118Sn	274.29	276.57	280.97	285.19		280	50
121Sb	380.01	384.27	383.59	375.46		450	110
125Te	239.52	241.69	235.41	227.87
126Te	240.84	242.32	234.64	229.84
138Ba	414.92	423.35	431.21	441.61		427	5
182W	588.44	599.5	611.03	620.64		430	50
197Au	6.63	6.97	6.41	8.61		7
202Hg	0.43	0.36	0.39	0.26
205Tl	1.32	1.31	1.36	1.38		2	0
208Pb	371.98	379.3	388.65	402.93		378	12
209Bi	368.09	377.19	380.74	395.63		320	30

## Sheet: S3_c
	Analysed values					Reference values
	MASS1-0	MASS1-1	MASS1-2	MASS1-3		Certified values	Uncertainty		Used for	Quality control
Spot Size (µm)	75	75	75	75					Standard Name	MASS1-C
Start (s)	21.039	22.23	22.527	21.436					Data source	Wilson et al. (2002) - USGS
End (s)	59.147	58.552	58.75	58.651					Matrix	Pressed pellet (Fe-S-Zn)
Time (s)	38.108	36.322	36.223	37.215
Element Total	74.07	74.08	75.85	82.09
27Al	25.43	21.93	37.18	28.65
28Si	305.29	245.46	504.79	234.92
29Si	288.44	266.21	455.5	258.85
33S	262527	258655	267690	281272		276000	1000
34S	263069	260194	269481	285324		276000	1000
44Ca	80.73	74.99	64.73	97.08
47Ti	9.42	12.17	6.34	23.39
49Ti	17.53	22.16	11.47	27.67
51V	62	62.27	62.5	63.12		63	10
52Cr	62.63	63.94	63.07	68.59		65	11
53Cr	63.46	64.2	63.82	70.44		65	11
55Mn	216.66	225.07	237.63	292.19		280	80
57Fe	156000	156000	156000	156000		156000	1000
59Co	66.33	65.85	66.66	72.33		60	10
60Ni	100.52	101.1	103.65	116.15		97	15
61Ni	106.65	107.35	109.42	108.59		97	15
65Cu	145177	144580	140792	145571		134000	500
66Zn	174595	178250	190165	232122		210000	5000
71Ga	66.3	65.53	65.73	66.05		64	11
72Ge	58.07	57.78	57.74	59.07		50
75As	58	58.17	56.41	55.99		65	3
82Se	40.97	39.7	40	42.23		51	4
90Zr	1.47	1.48	1.94	2.13
91Zr	1.3	1.4	1.99	2.03
95Mo	56.19	56.13	56.89	58.43		59	9
96Mo	40.84	40.58	41.16	41.46		59	9
105Pd	0.69	0.69	0.62	0.68
107Ag	68.64	67.35	65.92	67.82		50	5
108Pd	1.05	0.96	1.03	1.18
111Cd	50.57	46.36	49.73	55.44		60	7
115In	57.53	56.4	57.15	59.42		50
118Sn	52.32	52.93	52.83	55.27		59	6
121Sb	69.31	67.61	67.84	68.21		60	9
125Te	18.37	18.53	17.62	18.05		15
126Te	18.33	18.24	17.59	18.21		15
138Ba	3.39	2.55	13.89	4.19		14	5
182W	27.86	27.18	27.48	28.78		20	2
197Au	56	56.16	58	56.57		47
202Hg	63.67	42.77	41.14	27.27		57	3
205Tl	51.46	49.69	48.97	52.46		50
208Pb	80.32	78.78	79.09	84.74		68	7
209Bi	78.62	76.35	76.31	82.46		60

## Sheet: S3_d
	Analysed values				Reference values
	CCU-1e-1	CCU-1e-2	CCU-1e-3		Certified values		Used for	Quality control
Spot Size (µm)	75	75	75				Standard Name	CCU-1e
Start (s)	21.733	21.932	22.726				Data source	Certified by CCRMP (Canadian Certified Reference Materials Project)
End (s)	58.75	59.246	59.345				Matrix	Copper concentrate
Time (s)	37.016	37.314	36.619
Element Total	96.9	98.31	98.76
27Al	1160.7	1134.29	1194.62		1385
28Si	26102.8	27282.1	23827.5		14700
29Si	25977.8	27876.2	23396.2		14700
33S	357432	370242	369662		352800
34S	363412	373006	373580		352800
44Ca	1105.41	1139.78	1048.21		1290
47Ti	53.36	44.03	45.02		54.9
49Ti	59.55	46.72	50.9		54.9
51V	4.06	3.4	3.82
52Cr	74.44	37.14	33.56
53Cr	76.69	39.29	35.98
55Mn	77.68	102.99	93.23		96
57Fe	307000	307000	307000		307000
59Co	307.73	312.1	326.55		301
60Ni	20.96	19.19	20.26		7.27
61Ni	20.42	20.31	17.47		7.27
65Cu	226119	226427	226370		230700
66Zn	32989.9	36124.7	43388.4		30200
71Ga	2.95	2.99	3.55		3
72Ge	2.12	2.41	2.05		1
75As	1018.34	920.25	1100.23		1010
82Se	231.79	226.98	229.82		304
90Zr	4.26	19.61	1.57
91Zr	4.53	18.59	1.48
95Mo	10.27	6.28	44.33		16.1
96Mo	7.15	7.49	29.51		16.1
105Pd	1.11	0.98	1.03
107Ag	205.32	214.62	200.1		205.2
108Pd	2.05	1.99	1.98
111Cd	101.73	102.65	102.98		74.2
115In	5.81	5.76	5.82		6
118Sn	12.07	14.22	21.44
121Sb	96.06	162.49	102.7		104
125Te	54.17	64.02	67.08		61.8
126Te	54.45	64.61	68.41		61.8
138Ba	3.98	5.64	4.59		6
182W	0.93	0.57	0.57
197Au	9.11	9.73	10.09		20.27
202Hg	7.2	7.18	6.11		10.4
205Tl	2.19	2.11	2.21		2.69
208Pb	8778.58	8705.43	8792.22		7030
209Bi	2.96	3.39	3.05		3

## Sheet: S3_e
	Analysed values				Reference values
	PTC-1B-1	PTC-1B-2	PTC-1B-3		Reference values		Used for	Quality control
Spot Size (µm)	75	75	75				Standard Name	UQAC-FeS-5
Start (s)	22.726	22.23	21.436				Data source	Savard et al. (2018)
End (s)	58.75	59.147	58.552				Matrix	Artificial sulfide
Time (s)	36.024	36.917	37.116
Element Total	100.9	102.26	101.71
27Al	58.08	61.95	61.47
28Si	1440.39	1310.65	1362.43		2061.1
29Si	1538.17	1429.61	1360.9		2061.1
33S	373600	384607	381254		355717
34S	374860	388254	383410		355717
44Ca	586.31	801.99	582.5
47Ti	15.25	15	14.71		16
49Ti	24.68	22.01	20.45		16
51V	23.55	23.91	23.55		24.8
52Cr	739.43	744.2	716.01		793.5
53Cr	727.09	746.31	722.78		793.5
55Mn	840.24	944.69	1145.07		991.5
57Fe	593000	593000	593000		593000
59Co	537.95	552.98	588.63		543.3
60Ni	24002.7	24863	26520.6		25360.8
61Ni	25384.5	25001.4	24565.6		25360.8
65Cu	8324.27	8053.9	7790.92		7723.5
66Zn	1682.54	2135.39	2150.49		1702.7
71Ga	9.02	9.71	10.16		0.2
72Ge	1.93	1.84	1.88		1.1
75As	16.13	13.53	18.82		16.3
82Se	20.03	23.82	19.82		21.7
90Zr	0.46	0.38	0.55
91Zr	0.43	0.41	0.46
95Mo	31.99	68.24	33.44		36.8
96Mo	42.76	72.32	43.32		36.8
105Pd	72.29	74.5	73.5		80.6
107Ag	3.38	3.41	3.14		2.8
108Pd	72.52	72.26	70.17		80.6
111Cd	3.83	4.2	3.9		3.3
115In	0.93	1.03	0.93		0.9
118Sn	112.67	123.2	112.38		112
121Sb	18.76	19.14	18.31		18.6
125Te	1.96	2.24	1.82		2.2
126Te	1.93	2.03	1.89		2.2
138Ba	105.13	113.66	111.14		115.3
182W	11.15	12.7	11.97		9.9
197Au	108.43	106.89	104.45		91.5
202Hg	0.35	0.27	0.09
205Tl	3.59	3.49	3.46		4.2
208Pb	20.95	26.42	28.34		23.2
209Bi	937.18	1058.06	1088.11		807.5

## Sheet: S4
UTMEU18, UTMNU18 - location of samples (UTM NAD83 zone 18N)								Al	Si	Si	S	S	Ca	Ti	Ti	V	Cr	Cr	Mn	Fe	Co	Ni	Ni	Cu	Zn	Ga	Ge	As	Se	Zr	Zr	Mo	Mo	Pd	Ag	Pd	Cd	In	Sn	Sb	Te	Te	Ba	W	Au	Hg	Tl	Pb	Bi
Elements not considered in this study due to interferences							Isotope	27	28	29	33	34	44	47	49	51	53	53	55	57	59	60	61	65	66	71	72	75	82	90	91	95	96	105	107	108	111	115	118	121	125	126	138	182	197	202	205	208	209
Elements not considered in 'Element Total (wt%)'							unit	ppm	ppm	ppm	ppm	ppm	ppm	ppm	ppm	ppm	ppm	ppm	ppm	ppm	ppm	ppm	ppm	ppm	ppm	ppm	ppm	ppm	ppm	ppm	ppm	ppm	ppm	ppm	ppm	ppm	ppm	ppm	ppm	ppm	ppm	ppm	ppm	ppm	ppm	ppm	ppm	ppm	ppm
n.d. - not detected							Detection limit (ppm)	0.05	24.1	32.165	346.25	226	1.87	0.1	0.18	0.01	0.05	0.05	0.055	0.315	0.01	0.03	0.045	0.03	0.05	0.02	0.02	0.06	0.275	0.01	0.01	0.03	0.01	0.01	0.01	0.01	0.01	0.02	0.01	0.01	0.03	0.03	0.01	0.01	0.01	0.02	0.01	0.01	0.03
Sample	UTMEU18	UTMNU18	Analysis	Pyrite zone	Spot Size (µm)	Integration length (s)	Element Total (wt%)	Al	Si	Si	S	S	Ca	Ti	Ti	V	Cr	Cr	Mn	Fe	Co	Ni	Ni	Cu	Zn	Ga	Ge	As	Se	Zr	Zr	Mo	Mo	Pd	Ag	Pd	Cd	In	Sn	Sb	Te	Te	Ba	W	Au	Hg	Tl	Pb	Bi
Kokko	547443	5.52543e+06	line 1	inclusion-poor rim	75	40.994	96.7	1393.93	2433.38	2465.27	506515	496489	482.44	32.57	39.64	2.69	0.08	0.17	12.98	465500	519.8	100.81	105.43	9.4	1.83	0.31	1	2.91	4.56	10.37	10.05	n.d.	1.35	n.d.	0.2	n.d.	<0.00	<0.00	0.08	0.01	2.44	2.45	1.11	0.01	n.d.	0.38	0.01	2.19	6.12
Kokko	547443	5.52543e+06	line 1	inclusion-bearing core	75	49.441	97.99	1757.1	2486.62	2537.01	515151	508231	230.65	22.84	36.64	1.52	0.08	0.22	22.49	465500	1336.19	92.06	100.21	52.22	3.93	0.21	0.99	24.79	5.35	3.73	3.95	0.01	0.62	n.d.	9.14	0.01	0.02	<0.00	0.08	0.03	8.15	8.29	2.65	0.21	0.01	0.38	0.01	25.02	27.9
Kokko	547443	5.52543e+06	line 2	inclusion-bearing core	75	16.972	101.38	10945.5	16439.5	15828.7	511345	510495	9894.02	14.83	27.42	14.97	0.07	0.26	26.81	465500	251.57	112.46	118.59	16.4	1.38	3.87	1.23	3.07	5.27	5.64	5.88	n.d.	0.81	0.02	2.27	0.01	0.03	0.01	0.12	0.02	2.74	2.74	0.23	0.04	n.d.	0.44	n.d.	0.9	4.63
Kokko	547443	5.52543e+06	line 2	inclusion-poor rim	75	25.732	97.67	499.62	1188.78	1183.68	511850	509062	76.14	24.1	35.52	3.5	0.38	0.52	7.2	465500	136.25	141.87	146.21	5.39	1.18	0.12	0.97	1.6	5.45	13.27	15.39	<0.00	1.86	n.d.	0.07	n.d.	0.01	n.d.	0.04	<0.00	1.15	1.34	1.12	n.d.	n.d.	0.29	0.01	0.36	2.43
Kokko	547443	5.52543e+06	line 2	inclusion-bearing core	75	19.345	99.72	325.64	1046.89	1118.66	537239	527634	489.47	103.31	111.31	4.55	0.06	0.18	12.23	465500	264.7	213.77	241.79	1511.34	39.73	0.11	0.98	1.52	8.89	0.54	0.51	n.d.	0.09	0.02	7.51	0.01	0.38	0.1	0.18	n.d.	8.26	8.18	0.18	0.14	0.04	0.32	n.d.	0.29	11.91
Kokko	547443	5.52543e+06	line 3	inclusion-poor rim	75	41.062	96.23	871.6	2018.53	2063.39	505319	492756	571.78	106.57	118.36	17.04	1.02	1.06	29.26	465500	121.23	113.45	120.76	106.63	4.94	0.3	0.96	0.62	4.64	8.99	13.09	n.d.	1.5	n.d.	0.38	n.d.	0.05	n.d.	1.98	0.01	10.43	10.24	0.46	1.01	n.d.	0.36	0.01	1.65	26.41
Kokko	547443	5.52543e+06	line 3	inclusion-bearing core	75	23.724	99.01	1842.42	3422.32	3335.54	526862	517449	872.37	71.65	84.18	19.21	1.82	2.03	40.25	465500	561	80.1	85.78	58.04	6.19	0.63	1.02	2.82	5.14	2.1	2	0.02	0.31	n.d.	1.26	n.d.	0.05	0.01	1.75	0.02	51.16	51.36	0.5	0.31	n.d.	0.37	0.01	3.04	77.44
Kokko	547443	5.52543e+06	line 4	inclusion-bearing core	75	33.214	98.04	4679.52	7587.39	7521.54	501574	497566	3002.36	542.7	510.87	148.19	2.15	2.31	63.49	465500	784.52	71.02	78.03	216.61	35.6	2.02	1.02	6.25	4.54	0.13	0.12	0.03	0.07	n.d.	2.98	0.01	0.44	0.01	0.92	0.06	68.95	69.66	1.38	14.24	0.01	0.36	0.01	8.49	102.73
Kokko	547443	5.52543e+06	line 4	inclusion-poor rim	75	12.227	101.1	4248.46	5656.05	5700.35	541990	534003	1010.27	35.63	50.85	5.53	0.35	0.51	49.94	465500	273.86	111.01	117.15	16.85	7.14	0.58	1.11	1.89	3.45	11.65	12.78	<0.00	1.71	<0.00	0.29	n.d.	0.02	n.d.	0.28	0.02	1.97	1.98	3.47	1.24	<0.00	0.35	0.02	0.67	14.82
Kokko	547443	5.52543e+06	line 5	inclusion-poor rim	75	19.051	97.3	4410.98	5267.35	5816.92	506242	495585	1595.37	11.13	16.43	1.69	<0.12	0.07	71.03	465500	255.79	175.23	184.63	41.22	10.31	1.06	1.01	26.77	5.73	0.04	0.03	0.01	0.04	n.d.	7.7	n.d.	0.01	n.d.	0.04	0.04	7.75	7.64	1.52	0.03	0.09	0.52	0.01	44.52	11.4
Kokko	547443	5.52543e+06	line 5	inclusion-bearing core	75	27.831	96.43	317.38	251.26	684.01	506976	494541	58.77	1.98	13.98	0.22	<0.09	0.06	10.79	465500	117.02	166.45	177.48	2610.24	112.33	0.07	0.89	32.91	5.07	0.01	0.01	n.d.	0.04	0.02	12.34	0.04	1.56	0.12	0.15	0.05	7.74	7.75	0.04	n.d.	0.04	0.43	0.01	484.09	35.93
Kokko	547443	5.52543e+06	line 6	inclusion-poor rim	75	13.775	97.97	999.47	2085.92	2122.3	525442	509356	638.75	2.07	14.73	2.43	<0.07	0.12	11.54	465500	576.74	118.23	122.93	336.99	1.42	0.36	1.06	12.61	5.87	0.01	0.02	0.01	0.04	0.01	1.9	n.d.	0.03	n.d.	0.02	0.04	17.39	18.51	0.04	0.01	0.01	0.34	n.d.	6.39	33.18
Kokko	547443	5.52543e+06	line 6	inclusion-bearing core	75	28.196	96.94	789.12	1199.81	1173.73	511420	500534	38.13	3.02	14.47	0.47	0.09	0.15	11.27	465500	486.04	282.14	299.97	350.77	3.51	0.14	1	31.72	4.63	1.35	1.97	n.d.	0.24	0.01	5.93	0.01	0.07	n.d.	0.07	0.04	9.64	8.85	1.91	n.d.	0.01	0.36	0.01	53.69	38.1
Kokko	547443	5.52543e+06	line 6	inclusion-bearing core	75	19.156	98.94	1048.39	1453.02	1452.53	527176	517198	2388	65.31	89.32	0.92	0.15	0.35	11.51	465500	1505.61	93.39	117.07	77.05	7.5	0.17	1.02	2.87	2.83	3.3	3.26	n.d.	0.36	n.d.	0.77	n.d.	0.02	n.d.	0.19	0.03	5.64	6.12	1.88	0.01	n.d.	0.32	0.01	5.77	24.87
Kokko	547443	5.52543e+06	line 6	inclusion-poor rim	75	17.004	98.39	5929.52	7946.96	7997.47	512610	502525	1028.42	12.21	27.19	2.39	0.25	0.2	79.52	465500	372.6	174.91	181.53	76.34	12.08	0.93	0.96	50.48	6.26	0.38	0.37	0.2	0.2	0.01	23.91	0.01	0.03	n.d.	0.2	0.12	10.49	11.86	4.42	0.03	0.01	0.42	0.05	52.29	60.41
Kokko	547443	5.52543e+06	spot 1	inclusion-poor rim	75	13.252	99.97	1291.11	6313.54	6329.93	545722	522613	2580.37	938.21	887.79	17.07	1.49	1.52	76.25	465500	204.77	80.61	94.22	8.65	3.79	0.4	1.16	0.39	5.46	22.69	22.48	<0.00	3.04	<0.00	0.28	n.d.	0.01	0.01	0.85	0.01	5.63	5.96	0.44	0.46	n.d.	0.28	n.d.	2.57	28.32
Kokko	547443	5.52543e+06	spot 2	inclusion-poor rim	75	16.081	100.02	183.99	285.67	284.95	551688	533365	75.02	0.83	14.12	0.06	<0.09	<0.07	2.28	465500	407.45	143.21	143.69	3.47	0.42	0.03	0.98	32.26	3.8	n.d.	<0.00	<0.00	0.02	n.d.	2.8	n.d.	0.04	<0.00	0.01	0.01	2.99	3.07	0.01	n.d.	n.d.	0.34	0.01	135.94	18.42
Kokko	547443	5.52543e+06	spot 3	inclusion-poor rim	75	16.156	102.81	28.68	92.06	<41.71	580983	562096	22.23	1.06	14.27	0.04	<0.09	<0.07	0.32	465500	128.11	171.04	176.3	2.77	0.19	0.01	1	3.39	15.07	n.d.	<0.00	n.d.	0.03	0.03	0.1	0.03	0.01	<0.00	0.01	<0.01	3.87	3.7	0.01	<0.00	n.d.	0.3	<0.00	1.55	0.88
Kokko	547443	5.52543e+06	spot 4	inclusion-poor rim	75	17.868	100.84	14.44	105.16	87.55	556254	542464	7.09	1.32	13.82	0.07	<0.08	0.1	0.35	465500	125.22	109.49	114.32	0.44	0.14	0.01	0.97	0.73	5.29	36.87	36.95	n.d.	5.13	n.d.	n.d.	n.d.	0.01	<0.00	0.01	<0.01	1.41	1.33	0.01	n.d.	n.d.	0.19	n.d.	0.02	0.38
Kokko	547443	5.52543e+06	spot 5	inclusion-poor rim	75	17.198	101.34	874.57	6025.37	6003.13	539785	526560	6674.85	7455.21	7211.05	97.07	1.66	1.84	28.08	465500	237.66	95.55	100.56	2.74	1.6	0.33	2.13	1.2	8.22	7.75	7.75	0.01	1.1	0.03	0.46	0.01	0.01	0.02	5.02	0.02	7.86	7.47	1	26.07	n.d.	0.18	0.01	2.81	16.88
Kokko	547443	5.52543e+06	spot 6	inclusion-bearing core	75	15.858	100.37	1820.51	2866.81	2878.44	531987	526294	1084.45	2.79	15.99	1.38	<0.09	<0.09	6.46	465500	455.57	142.25	142.75	5305.89	1.75	0.32	0.97	9.1	4.94	6.07	7.56	0.01	0.78	0.03	11	0.01	0.21	<0.00	<0.01	0.05	30.6	31.8	0.14	0.01	0.03	0.31	n.d.	12.19	88.55
Kokko	547443	5.52543e+06	spot 7	inclusion-poor rim	75	17.794	101.22	22.95	76.44	123.58	546289	545896	5.3	16.36	16.14	0.33	<0.08	0.21	0.54	465500	432.58	161	171.56	6.48	0.15	0.02	1.03	0.39	6.32	5.5	5.81	<0.00	0.93	n.d.	0.02	n.d.	0.01	<0.00	0.01	<0.00	1.39	1.99	0.08	<0.00	n.d.	0.24	n.d.	2.55	4.08
Kokko	547443	5.52543e+06	spot 8	inclusion-bearing core	75	16.975	102.14	5713.51	9236.79	9472.2	559936	537205	3279.75	110.46	127.49	6.58	0.42	0.45	21.47	465500	21.22	21.56	33.03	94.45	2.63	1.05	1.06	1.04	7.35	2.3	2.18	n.d.	0.3	<0.00	1.27	n.d.	0.01	n.d.	0.49	0.05	0.53	0.41	0.39	0.15	0.03	0.31	0.02	53.23	42.23
Kokko	547443	5.52543e+06	spot 9	small pyrite + silicate (mixed signal)	75	13.252	278.96	764522	1.03394e+06	1.05617e+06	34586.8	38533.4	473524	3416.96	3267.79	261.62	8.52	4.43	8413.71	465500	46.78	165.4	198.77	22.5	989.24	159.35	6.41	21.33	<8.19	6.49	5.53	<0.03	0.84	0.14	17.27	0.02	0.4	0.06	1.25	0.3	20.06	20.98	96.81	1.61	<0.01	6.97	0.37	17.25	51.5
Queylus	543739	5.50835e+06	line 7	inclusion-poor pyrite	75	122.01	98.83	17.57	<10.15	43.35	532422	520564	5.92	7.4	15.94	0.1	0.13	0.22	0.48	465500	2055.6	21.94	21.5	16.77	0.37	0.01	0.89	17.03	14.84	2.26	2.29	0.37	0.54	n.d.	0.81	n.d.	<0.00	<0.00	0.06	0.01	22.96	23.07	0.12	0.58	0.1	0.42	n.d.	0.84	1.09
Queylus	543739	5.50835e+06	line 7	inclusion-bearing pyrite	75	46.516	101.12	225.74	699.05	884.06	544966	531076	41.22	10.24	16.8	0.44	0.44	0.46	1.97	465500	2574.53	38.05	41.61	10957.6	1.76	0.04	0.92	31.31	14.38	0.1	0.06	0.08	0.09	0.05	1.68	n.d.	n.d.	n.d.	0.56	0.05	55.3	55.9	1.13	0.07	0.21	0.49	n.d.	2.74	3.04
Queylus	543739	5.50835e+06	line 8	inclusion-bearing pyrite	75	49.896	101.68	1512.06	8494.21	10192	549430	534770	187.58	94.78	96.87	0.96	0.69	0.62	7.33	465500	1666.15	1259.38	1256.56	3184.78	5.3	0.43	0.94	6.59	41.42	1.27	1.19	0.14	0.25	0.02	1.04	0.01	0.02	0.03	2.72	0.03	3.81	3.64	30.13	0.11	0.09	0.25	0.01	1.59	4.48
Queylus	543739	5.50835e+06	line 8	inclusion-poor pyrite	75	36.668	99.72	28.39	<13.96	47.17	541194	528705	8.93	2.46	10.47	0.17	0.1	0.14	1.51	465500	145.11	2552.36	2539.6	152.4	1.66	0.01	0.87	7.88	62.36	0.02	0.01	0.01	0.04	0.01	0.09	0.01	n.d.	n.d.	0.02	0.01	4.18	4.21	0.21	n.d.	0.07	0.2	n.d.	0.95	4.51
Queylus	543739	5.50835e+06	spot 10	inclusion-poor pyrite	75	10.349	97.92	4.12	<24.34	<31.61	525749	511910	<1.47	0.88	9.67	0.04	0.08	0.11	0.15	465500	1582.19	8.41	9.35	30.85	0.07	0.01	0.82	25.53	13.76	n.d.	<0.00	0.01	0.03	<0.00	0.01	<0.00	0.01	<0.00	0.15	<0.00	76.66	77.45	0.01	0.01	n.d.	0.28	<0.00	0.01	0.11
Queylus	543739	5.50835e+06	spot 11	inclusion-poor pyrite	75	9.306	98.83	2.28	38.73	50.5	534759	520697	9.82	0.74	10.19	0.1	<0.05	0.08	1.1	465500	1852.52	23.43	23.41	74.69	0.26	n.d.	0.83	5.12	4.36	0.01	0.01	0.01	0.03	<0.00	0.01	<0.00	<0.00	n.d.	0.76	<0.00	77.19	78.31	0.18	0.05	0.19	0.22	n.d.	0.08	0.98
Queylus	543739	5.50835e+06	spot 12	inclusion-bearing pyrite	75	8.86	103.65	189.91	1039.15	844.99	576403	565946	26.96	14.65	16.47	0.12	0.13	0.23	0.66	465500	2876.28	632.71	623.43	187.75	4.34	0.05	0.89	2.71	27.38	0.12	0.07	0.01	0.03	n.d.	0.11	n.d.	0.01	0.01	1.97	0.01	1.66	1.55	4.28	0.01	0.03	0.14	n.d.	0.39	7.77
Queylus	543739	5.50835e+06	spot 13	inclusion-poor pyrite	75	6.701	101.1	15.44	37.42	70.96	538474	539896	2.8	0.8	9.92	0.05	<0.05	0.03	0.27	465500	5406.82	52.37	51.55	4.13	0.12	0.02	0.99	33.92	26.4	n.d.	<0.00	n.d.	0.02	<0.00	n.d.	n.d.	n.d.	n.d.	0.85	<0.00	0.88	0.8	0.23	<0.00	0.01	0.11	n.d.	0.04	0.58
Queylus	543739	5.50835e+06	spot 14	inclusion-poor pyrite	75	7.817	99.7	2.52	29.41	67.44	550286	530800	<1.89	1.15	10.44	0.06	<0.05	0.08	0.17	465500	199.27	403.82	385.26	11.26	0.13	n.d.	0.97	2.81	62.35	n.d.	n.d.	<0.00	0.02	n.d.	0.01	n.d.	n.d.	n.d.	0.74	<0.00	1.01	0.99	0.01	<0.00	<0.00	0.11	<0.00	n.d.	n.d.
Queylus	543739	5.50835e+06	spot 15	inclusion-poor pyrite	75	11.54	100.46	0.17	<25.12	<30.65	553069	537203	5.32	0.75	10.78	0.03	<0.04	0.06	0.13	465500	223.73	1448.67	1494.4	33.97	0.11	n.d.	0.91	16.81	75.88	n.d.	<0.00	<0.00	0.03	<0.00	0.54	n.d.	<0.00	<0.00	0.01	0.03	11.54	11.97	0.06	<0.00	0.13	0.24	n.d.	2.27	5.46
Queylus	543739	5.50835e+06	spot 16	inclusion-poor pyrite	75	11.689	102.29	1.72	<25.55	67.1	574602	556554	4.08	0.64	10.1	0.03	<0.05	0.06	0.48	465500	44.82	583.25	593.61	23.64	0.19	0.01	0.88	4.18	82.15	<0.00	<0.00	0.01	0.04	n.d.	0.67	n.d.	n.d.	<0.00	0.11	0.01	8.43	8.28	0.15	<0.00	0.02	0.21	n.d.	0.4	23.01
Queylus	543739	5.50835e+06	spot 17	inclusion-poor pyrite	75	13.103	104.74	0.37	<25.27	33.88	565921	561497	<1.59	0.68	10.84	0.04	<0.04	0.05	0.13	465500	19904.9	275.93	282.56	130.12	0.13	0.02	0.78	6.94	19.12	n.d.	0.01	<0.00	0.04	n.d.	0.04	<0.00	<0.00	<0.00	0.11	0.01	1.12	0.99	0.01	<0.00	0.01	0.56	n.d.	0.04	0.5
Queylus	543739	5.50835e+06	spot 18	inclusion-bearing pyrite	75	12.88	98.16	411.71	696.87	716.35	541530	513569	1.8	467.49	404.07	5.75	0.87	0.8	5.83	465500	34.32	2.92	2.26	9.14	0.16	0.88	0.86	610.79	4.87	0.06	0.07	0.05	0.08	n.d.	0.07	<0.00	n.d.	0.01	0.69	0.11	278.89	277.78	0.75	3.94	1.36	0.41	n.d.	0.42	7.9
Queylus	543739	5.50835e+06	spot 19	inclusion-bearing pyrite	75	11.093	97.93	391.88	823.65	1110.82	526104	506124	112.08	44.04	53.72	19.11	0.55	0.63	15.96	465500	299.92	24.18	22.46	4868.34	5.93	4.64	1.09	533.3	17.64	0.17	0.2	0.45	0.3	0.03	2.41	n.d.	0.14	0.03	3.88	0.85	405.96	401.98	3.92	19.39	3.03	0.58	0.02	31.95	33.78
